# Supplementary material for: Evaluating a custom-designed aid to improve communication of genetic results in families with hypertrophic cardiomyopathy: study protocol for a randomised controlled trial
Source: PubMed Central journal article supplement — BMJ Open. 2019 Feb 1;9(1):e026627. doi: 10.1136/bmjopen-2018-026627 (PMC6361342; doi:10.1136/bmjopen-2018-026627), 2019-02-01
Supplement: bmjopen-2018-026627.draft_revisions.pdf [file bmjopen-2018-026627.draft_revisions.pdf]

# BMJ Open

BMJ Open is committed to open peer review. As part of this commitment we make the peer review history of every article we publish publicly available.

When an article is published we post the peer reviewers' comments and the authors' responses online. We also post the versions of the paper that were used during peer review. These are the versions that the peer review comments apply to.

The versions of the paper that follow are the versions that were submitted during the peer review process. They are not the versions of record or the final published versions. They should not be cited or distributed as the published version of this manuscript.

BMJ Open is an open access journal and the full, final, typeset and author-corrected version of record of the manuscript is available on our site with no access controls, subscription charges or pay-per-view fees (<http://bmjopen.bmj.com>).

If you have any questions on BMJ Open's open peer review process please email [info.bmjopen@bmj.com](mailto:info.bmjopen@bmj.com)

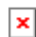

**EVALUATING A CUSTOM DESIGNED AID TO IMPROVE  
COMMUNICATION OF GENETIC RESULTS IN FAMILIES WITH  
HYPERTROPHIC CARDIOMYOPATHY: STUDY PROTOCOL FOR  
A RANDOMISED CONTROLLED TRIAL**

|                               |                                                                                                                                                                                                                                                             |
|-------------------------------|-------------------------------------------------------------------------------------------------------------------------------------------------------------------------------------------------------------------------------------------------------------|
| Journal:                      | <i>BMJ Open</i>                                                                                                                                                                                                                                             |
| Manuscript ID                 | bmjopen-2018-026627                                                                                                                                                                                                                                         |
| Article Type:                 | Protocol                                                                                                                                                                                                                                                    |
| Date Submitted by the Author: | 12-Sep-2018                                                                                                                                                                                                                                                 |
| Complete List of Authors:     | Burns, Charlotte; Centenary Institute, Molecular Cardiology Program<br>Yeates, Laura; Centenary Institute, Molecular Cardiology Program<br>Semsarian, Christopher; Centenary Institute,<br>Ingles, Jodie; Centenary Institute, Molecular Cardiology Program |
| Keywords:                     | Protocols & guidelines < HEALTH SERVICES ADMINISTRATION &<br>MANAGEMENT, Cardiomyopathy < CARDIOLOGY, Genetics < TROPICAL<br>MEDICINE                                                                                                                       |
|                               |                                                                                                                                                                                                                                                             |

SCHOLARONE™  
Manuscripts

1  
2  
3  
4  
5  
6  
7  
8  
9  
10  
11  
12  
13  
14  
15  
16  
17  
18  
19  
20  
21  
22  
23  
24  
25  
26  
27  
28  
29  
30  
31  
32  
33  
34  
35  
36  
37  
38  
39  
40  
41  
42  
43  
44  
45  
46  
47  
48  
49  
50  
51  
52  
53  
54  
55  
56  
57  
58  
59  
60

# EVALUATING A CUSTOM DESIGNED AID TO IMPROVE COMMUNICATION OF GENETIC RESULTS IN FAMILIES WITH HYPERTROPHIC CARDIOMYOPATHY: STUDY PROTOCOL FOR A RANDOMISED CONTROLLED TRIAL

Charlotte Burns, MGC MPH,\*†‡ Laura Yeates, GradDipGenCouns,\*‡ Christopher  
Semsarian, MBBS MPH PhD,\*†‡ Jodie Ingles, GradDipGenCouns MPH PhD\*†‡

\*Agnes Ginges Centre for Molecular Cardiology, Centenary Institute, Sydney, Australia;

†Sydney Medical School, Faculty of Medicine and Health, University of Sydney;

‡Department of Cardiology, Royal Prince Alfred Hospital, Sydney, Australia.

*Total word count: 3097 (not including abstract or references)*

*Key words: Protocol, randomised controlled trial, hypertrophic cardiomyopathy, genetic testing.*

## **NO DISCLOSURES**

### **Address for Correspondence:**

Doctor Jodie Ingles

Agnes Ginges Centre for Molecular Cardiology

Centenary Institute

Locked Bag 6

Newtown NSW 2042 Australia

Email: [j.ingles@centenary.org.au](mailto:j.ingles@centenary.org.au)

## ABSTRACT

**Introduction:** Genetic testing for hypertrophic cardiomyopathy (HCM) in the era of genomics brings unique challenges for genetic counselling. The number of genes routinely included in an HCM gene panel has increased markedly, many with minimal if any robust evidence of gene-disease association. Subsequently there is a greater chance of uncertain genetic findings. The responsibility of communicating this information with at-risk relatives lies with the index case (proband). We have developed a communication aid to assist with the delivery of genetic results to the proband. We have previously shown the aid is feasible and acceptable, and have now developed a study protocol for a randomised controlled trial of a genetic counsellor-led intervention incorporating the communication aid.

**Methods and Analysis:** This is a prospective randomised controlled trial. We will investigate the impact of a genetic counsellor-led intervention to return proband gene results using a custom designed communication aid. We aim to improve knowledge and empowerment. The primary outcome of this trial is the ability and confidence of the proband to communicate genetic results to at-risk relatives. Secondary outcomes will assess genetic knowledge, satisfaction with services, outcomes from genetic counselling and psychological adaptation to genetic information.

**Ethics and Dissemination:** This study has been approved by and is in strict accordance with the Sydney Local Health District Ethics Review Committee (X16-0030; 22/01/2016; version 1). Results from this trial will be prepared as a manuscript and submitted to peer-reviewed journals for publication as well as submission for presentation at national and international meetings.

**Registration Details:** This trial is registered with the Australian New Zealand Clinical Trials Registry: ACTRN12617000706370

## STRENGTHS AND LIMITATIONS

- This study will assess the effectiveness of a communication aid to improve the ability and confidence of patients with hypertrophic cardiomyopathy (HCM) to communicate genetic test results with their at-risk relatives.
- The results of this trial will inform genetic counselling practice for HCM genetic testing, as well as be broadly applicable for other inherited heart diseases.
- Limitations include the generalisability of our findings, which are true for a specialised multidisciplinary clinic where the intervention was performed but may not be representative of the broader HCM population undergoing genetic testing.
- As genomic technologies continue to evolve, uncertainty and complexity of genetic findings will likely increase over time.

## INTRODUCTION

### Background and rationale

Genetic testing in the era of genomics brings unique challenges for the genetic counselling of families. Hypertrophic cardiomyopathy (HCM) is a clinically heterogeneous inherited heart disease characterised by unexplained left ventricular hypertrophy in the absence of a loading condition such as hypertension.<sup>1</sup> With a prevalence of 1 in 200-500, it is one of the most common inherited heart diseases and clinical manifestations can range from asymptomatic through to heart failure or sudden cardiac death.<sup>2</sup> In the setting of HCM, genetic testing of the index case (proband) can provide invaluable information by allowing at-risk relatives the opportunity to undergo cascade genetic testing to look for the presence or absence of the family-specific variants.<sup>3</sup> The first step is often the most challenging, requiring identification of a variant for which there is sufficient evidence of causation.

Genetic counselling is a critical aspect of the process, not just for genetic testing, but also for understanding inheritance risks, characterisation of the family history and information and emotional support.<sup>4</sup> Within a clinical setting, pre- and post-test genetic counselling should include discussion of inheritance risks and clinical screening guidelines for at-risk relatives.<sup>5</sup> This allows asymptomatic at-risk relatives to make proactive, informed decisions regarding their risk, including family planning decisions.

How a patient understands and communicates this genetic information to their at-risk relatives is critical to ensuring patients' get the most value out of genetic testing. This task of communication relies on the proband within the family. Current Australian practice and privacy laws dictate that in most cases the health care provider does not make contact with relatives to disclose risk information. Therefore, it follows that in order to communicate genetic results or risk information the proband must have adequate understanding of the

1 information they have received from their healthcare provider. Several studies indicate this  
2  
3 may be problematic, and some individuals may not retain or understand the information  
4  
5 presented to them.<sup>6</sup>  
6  
7  
8  
9

### 10 **Existing knowledge**

11  
12 Currently literature estimates between 20-40% of relatives remain unaware of relevant  
13  
14 genetic information and do not act on information even when they have reportedly been  
15  
16 informed of their risk.<sup>7-9</sup> Many factors have been identified which influence family  
17  
18 communication about genetic risk, including complicated family dynamics, guilt, anxiety  
19  
20 and gender, however are difficult to target as areas for improvement within the context of  
21  
22 one or two genetic counselling sessions.<sup>7 8 10 11</sup> There are stages within the genetic  
23  
24 counselling process, where communication of genetic results and uptake of appropriate  
25  
26 screening may be influenced.  
27  
28  
29  
30  
31

32 Our group and others have shown some of the barriers that can negatively impact on  
33  
34 family communication. In a qualitative study of HCM patients undergoing comprehensive  
35  
36 genetic testing, many patients reported uncertain results to be conveyed less amongst  
37  
38 families.<sup>12</sup> Further, these results are often misunderstood. For example, amongst this  
39  
40 cohort, probands with uncertain results perceived these results as falsely reassuring or  
41  
42 conversely suggests their disease is 'worse' or 'different'. This led to a misunderstanding  
43  
44 that their result was not heritable and therefore communication with relatives did not  
45  
46 occur.<sup>12</sup> Supporting these findings, the general genetics literature highlights that risk  
47  
48 perception and understanding of results though varied, can be poor, inaccurate and  
49  
50 incomplete.<sup>13 14</sup>  
51  
52  
53  
54  
55  
56  
57  
58  
59  
60

1  
2  
3  
4  
5  
6  
7  
8  
9  
10  
11  
12  
13  
14  
15  
16  
17  
18  
19  
20  
21  
22  
23  
24  
25  
26  
27  
28  
29  
30  
31  
32  
33  
34  
35  
36  
37  
38  
39  
40  
41  
42  
43  
44  
45  
46  
47  
48  
49  
50  
51  
52  
53  
54  
55  
56  
57  
58  
59  
60

There is evidence for the effectiveness of a genetic counsellor in addressing some of the communication and knowledge barriers.<sup>15-17</sup> One key area for intervention is during the post-test genetic counselling session. Genetic and risk information can be difficult to understand and explain clearly and as a consequence, the patient may not gain sufficient knowledge and lack confidence to convey these key messages to at-risk relatives.<sup>12</sup> Further, it is recognised patients deliberate on the appropriate time to communicate genetic information and make decisions regarding which relatives the information is pertinent to, regardless of the recommendation of professionals.<sup>7 18 19</sup> Few resources exist which aim to facilitate effective communication to at-risk relatives. We therefore hypothesise that improving knowledge of an HCM genetic diagnosis will have a positive impact on communication to at-risk relatives, as well as genetic knowledge, satisfaction with services, outcomes from genetic counselling and psychological adaptation to genetic information.

### Utility of a communication aid

When asked about family communication, most patients report families should communicate risk amongst themselves with varying levels of support from their healthcare providers.<sup>14 17 20</sup> In addition, there is evidence for the effectiveness of genetic counselling to assist with this process.<sup>15 16 20</sup> Hodgson et al. published a randomised controlled trial assessing the impact of a genetic counselling phone intervention on communication of genetic information within families.<sup>21</sup> They found no significant difference between the intervention and control group when measuring contact with genetic services, though in sub-analyses of the high-risk children group, the primary outcome was significantly improved. Importantly, the primary outcome measure was contact with a genetic service, which can be difficult to ascertain and may not be the most accurate measure of effectiveness or a direct reflection of communication efforts.



1 Resources such as decision and communication aids, or family letters, may provide  
2 additional support to this process, though more data is needed regarding efficacy.<sup>15 19 21 22</sup>

3  
4  
5 Decision or communication aids are tools specifically designed to support patients with  
6 decision making and unmet information needs. There is evidence for the effectiveness of  
7 an aid with regard to improved knowledge and accuracy of risk perceptions.<sup>23-25</sup> Further,  
8 most health information is written which may not be the most effective health  
9 communication method. Communication and decision aids provide a format to include  
10 visual elements that may improve comprehension, recall and comfort with the information,  
11 particularly when health literacy may be an issue.  
12  
13  
14  
15  
16  
17  
18  
19  
20  
21  
22

### 23 **Need for a trial**

24  
25 Overall, the literature highlights that probands require additional support to understand and  
26 communicate genetic results. The rationale for this study is the critical gap in supporting  
27 patients' comprehension and consequent communication of genetic risk to at-risk relatives.  
28  
29 Though genetic counsellors are specifically trained in delivering genetic information,  
30 information needs of patients are not always met and communication amongst at-risk  
31 relatives can be suboptimal. As genetic test results become increasingly complex, an  
32 evidence-based approach to supporting patients with genetic knowledge and risk  
33 communication should be explored.  
34  
35  
36  
37  
38  
39  
40  
41  
42  
43  
44

### 45 **STUDY AIMS AND OUTCOMES**

46  
47 The aim of this randomised controlled trial is to determine if a genetic counsellor-led  
48 intervention using a communication aid for the delivery of HCM genetic test results  
49 improves the ability and confidence of the proband to communicate genetic results to at-  
50 risk relatives compared with current clinical practice.  
51  
52  
53  
54  
55  
56  
57  
58  
59  
60

- 1  
2  
3  
4  
5  
6  
7  
8  
9  
10  
11  
12  
13  
14  
15  
16  
17  
18  
19  
20  
21  
22  
23  
24  
25  
26  
27  
28  
29  
30  
31  
32  
33  
34  
35  
36  
37  
38  
39  
40  
41  
42  
43  
44  
45  
46  
47  
48  
49  
50  
51  
52  
53  
54  
55  
56  
57  
58  
59  
60
1. The primary outcome is the ability and confidence of the proband to communicate genetic results to at-risk relatives, measured at 2 weeks post-intervention.
2. Secondary outcomes will assess genetic knowledge, satisfaction with services, patient reported outcome of genetic counselling and psychological adaptation to genetic information, measured at 2 weeks post-intervention.
3. As a longer-term outcome, we will systematically assess and document family communication as reported by the proband measured by phone calls at one, three and six monthly intervals. The researcher conducting these phone calls will not be blinded to the treatment arm of the participant. These phone calls will be conducted and analysed after collection of the primary and secondary outcomes data. This is to prevent interference with results because the phone calls themselves may serve as a family communication intervention.

## **METHODS AND ANALYSIS**

### **Trial design**

This is a prospective randomised controlled trial. The protocol is reported in accordance with the SPIRIT statement, which provides recommendations for a minimum set of scientific, ethical and administrative elements that should be addressed within a clinical trial protocol.<sup>26</sup> All items from the World Health Organization Trial Registration Data Set are listed in Table 1. Consecutive HCM patients will be invited to participate when they are notified on the phone that their genetic result is ready to be returned. Once written consent is obtained they will be randomised to receive their genetic result via the intervention or control arm of the study (Figure 1).

### **Study setting**

This trial will be carried out within a specialised multidisciplinary HCM clinic. This incorporates the expertise of specialist cardiologists and cardiac genetic counsellors.<sup>27</sup> Patients with HCM attending these clinics at Royal Prince Alfred Hospital will be invited to attend.

### **Eligibility criteria**

HCM probands with a genetic result ready for return are eligible. Participants must be aged 18 years or older, with sufficient written English skills as nominated by the participant. Genetic testing is performed as part of a research study, or commercial laboratory as previously published.<sup>28 29</sup> All identified variants are classified in the same manner, as per current clinical standards and guidelines.<sup>30</sup> Recruitment commenced in November 2017 and is expected to end in November 2018. Participants will be invited to participate in the study during their routine pre clinic phone call conducted as normal

1 clinical process. Informed consent will be obtained by the cardiac genetic counsellor  
2 present at the participants clinic consultation (supplementary material).  
3  
4  
5  
6  
7

### 8 **Randomisation**

9  
10 A randomised list was prepared using the Excel (Microsoft Office) “Random” function and  
11 study participants who consent to the study are allocated the next number on the random  
12 list. This number is linked to either control or intervention. A researcher not involved in the  
13 study performs the randomisation.  
14  
15  
16  
17  
18  
19  
20

### 21 **Sample size and power calculations**

22  
23 Prior to commencement of the study, power calculations were performed using the results  
24 from our published feasibility study.<sup>31</sup> The primary outcome of this trial is the ability and  
25 confidence of the proband to communicate genetic results to at-risk relatives. Data from  
26 the feasibility study indicated 75% of participants communicated genetic results to at-risk  
27 relatives. Assuming the control group communicates in 50% of cases, at a significance  
28 level of 5% and 80% statistical power, a sample size of n=21 is required per group.  
29  
30  
31  
32  
33  
34  
35  
36  
37

### 38 **Development of the custom communication aid**

39  
40 We have developed a communication aid to assist with the delivery of genetic results to  
41 the proband and support family communication. A pilot study demonstrating feasibility and  
42 acceptability of this aid has been previously reported.<sup>31</sup> In brief, development of the aid  
43 involved review of the literature alongside multidisciplinary meetings. Development was a  
44 multistep process and on the basis of meeting outcomes, literature review and empirical  
45 evidence from the multidisciplinary team. The aid addresses:  
46  
47  
48  
49  
50  
51  
52

- 53 1. Genetic test basic background information
  - 54 2. Possible outcomes of genetic testing
- 55  
56  
57  
58  
59  
60

- 1
  - 2
  - 3
  - 4
  - 5
  - 6
  - 7
  - 8
  - 9
  - 10
  - 11
  - 12
  - 13
  - 14
  - 15
  - 16
  - 17
  - 18
  - 19
  - 20
  - 21
  - 22
  - 23
  - 24
  - 25
  - 26
  - 27
  - 28
  - 29
  - 30
  - 31
  - 32
  - 33
  - 34
  - 35
  - 36
  - 37
  - 38
  - 39
  - 40
  - 41
  - 42
  - 43
  - 44
  - 45
  - 46
  - 47
  - 48
  - 49
  - 50
  - 51
  - 52
  - 53
  - 54
  - 55
  - 56
  - 57
  - 58
  - 59
  - 60
3. Overview of the process involved in classification of a genetic variant
  4. Implications for at-risk relatives including family screening recommendations

### **Control arm**

Those within the control arm of the study will receive their result via normal clinical practice. There are currently no evidence-based guidelines for return of comprehensive genetic test results within the multidisciplinary clinic setting. Normal clinical practice typically involves return of a genetic result either by the cardiologist or genetic counsellor. Return of the result is usually performed following clinical cardiology review, which is often the primary purpose of the consult. In the majority of cases a genetic counsellor is present.

### **Intervention arm**

Those randomised to the intervention arm will be allocated a separate appointment time after clinical review with their cardiologist, where they will see the cardiac genetic counsellor who will return their genetic result using the communication aid.

The communication aid covers the process of genetic testing and risk from diagnosis of HCM through to the implications of a genetic result for at-risk relatives (Figure 2). There is a section in the aid under 'Results', which goes through the meaning of each category of genetic result. These include an indeterminate result (no variant identified), a variant of uncertain significance and a likely pathogenic/pathogenic result (Figure 3). The genetic counsellor returning the genetic result will mark the appropriate category of result, which applies to the patient in front of them. The genetic counsellor will return the genetic result, and then go through the communication aid, referencing the individual result and specific recommendations for the rest of the family. There will be an opportunity to ask questions,

1 and the genetic counsellor will write the specific recommendations for each family member  
2  
3  
4 in the box provided at the end of the communication aid (Figure 4).  
5  
6  
7

## 8 **DATA COLLECTION AND OUTCOMES**

9  
10 Both the primary and secondary outcomes will be measured at a single time point (2-  
11 weeks post intervention) using a survey comprised of a number of previously published  
12 and validated scales. A number of demographic questions will also be asked within the  
13 survey. The survey will be available online via qualtrics (<https://www.qualtrics.com/>) with a  
14 direct link sent to participants. For those who prefer a hard copy it will be posted with a  
15 return envelope. The survey will be sent two weeks after return of genetic results.  
16  
17 Evidence regarding the most appropriate time between genetic result disclosure and family  
18 communication is lacking. However, given the risk of arrhythmia and sudden death within  
19 the inherited heart disease context, two weeks post result disclosure was considered by  
20 the study team to be an appropriate time point to send the survey.<sup>25</sup> Return of the survey  
21 is followed up on a fortnightly basis.  
22  
23  
24  
25  
26  
27  
28  
29  
30  
31  
32  
33  
34  
35

### 36 **Primary outcome**

37  
38 The primary outcome of this trial is the ability and confidence of the proband to  
39 communicate genetic results to at-risk relatives. This will be measured at a single time  
40 point, administered two weeks after return of genetic results. Ability and confidence will be  
41 assessed by two measures and then combined into a binary outcome. The certainty sub-  
42 scale of the Psychological Adaptation to Genetic Information (PAGIS) scale will measure  
43 confidence with genetic knowledge.<sup>32</sup> This sub-scale measures the patients' perception  
44 and confidence in their genetic knowledge and the items from this sub-scale are listed in  
45 Table 2. Subsequent ability to pass this information on will be measured by the number of  
46 at-risk relatives informed of genetic results by the proband. We will average the scores  
47  
48  
49  
50  
51  
52  
53  
54  
55  
56  
57  
58  
59  
60

1 from both measures to determine a final score. The calculations used to determine this  
2 cut-off are illustrated in Table 3. The final score will be converted to a binary outcome of  
3 fair versus poor ability and confidence to communicate genetic results to at-risk relatives.  
4  
5  
6 This outcome has been specifically designed for this study.  
7  
8  
9

10  
11  
12 Factors that influence communication of genetic results to at-risk relatives are  
13 multidimensional. For this reason, we chose this combination approach to more broadly  
14 reflect the communication process. Many studies rely on single and linear measures of  
15 communication such as contact by relatives with genetics departments or self reported  
16 communication with at-risk relatives only. To overcome this, we aimed to incorporate a  
17 multidimensional approach that included the probands confidence regarding their  
18 knowledge of genetics alongside the action linked to this knowledge, being the  
19 communication to relatives. This will aim to determine consistency between the probands  
20 confidence with genetic information against their self-reported percentage of immediate  
21 family members informed  
22  
23  
24  
25  
26  
27  
28  
29  
30  
31  
32  
33

34  
35  
36 The certainty sub-scale of the Psychological Adaptation to Genetic Information Scale  
37 (PAGIS) will be used to measure confidence with genetic knowledge as described  
38 above.<sup>32</sup> Guided by grounded theory in patient perspectives of genetic counselling and the  
39 Roy Adaptation to Genetic Information Model, the 26-item PAGIS scale allows for  
40 evaluation of the efficacy of genetic counselling.<sup>32 33</sup> The scale aims to incorporate the  
41 multidimensional adaptation to genetic information and comprises of five domains which  
42 include; a) non-intrusiveness, b) support c) self-worth, d) certainty and e) self-efficacy.<sup>32</sup>  
43  
44  
45  
46  
47  
48  
49  
50  
51 Evidence for the utility of this scale has been published and illustrates its potential use for  
52 assessing genetic counselling interventions.<sup>32</sup>  
53  
54  
55  
56  
57  
58  
59  
60

## Secondary outcomes

The survey comprises three additional scales to assess primary and secondary outcomes, a number of questions regarding communication with relatives, as well as a number of demographic questions.

Genetic knowledge will be assessed using an amended version of the Breast Cancer Genetic Counseling Knowledge Questionnaire (BGKQ).<sup>33 34</sup> This scale was originally developed to assess knowledge of information typically included in genetic counselling for breast cancer. The original scale was a 27 item questionnaire including statements regarding genetics such as '*50% (half) of your genetic information was passed down from your mother*' and participants were asked if the statement was true or false. Items in the original scale were empirically derived from detailed content analysis of breast cancer genetic counselling sessions. The original scale demonstrated a high content validity with cronbachs  $\alpha = 0.92$ , with demonstrated ability to discriminate between patients before and after genetic counselling sessions.<sup>34</sup> We have amended questions to reflect the HCM context and 10 items were included.

Satisfaction with services received will be assessed using the widely used Satisfaction with Genetic Counseling Scale (SGCS).<sup>35</sup> The original questionnaire was designed to assess three dimensions of patient satisfaction: instrumental, affective and procedural.<sup>33 35</sup> This survey will use an amended version of the 12 item short form of the survey.

The genetic counselling outcome scale (GCOS-24) will be used to assess patient reported outcomes of genetic counselling.<sup>36</sup> The questionnaire was designed to be used pre and post genetic counselling, though we have used it in the post counselling setting. The



1 authors of this scale used the construct of empowerment to summarise the patient derived  
2  
3 benefits from genetic counselling.  
4  
5  
6  
7

### 8 **Data management**

9  
10 All data from the survey will be entered into Microsoft Excel. Patient identifiers will be  
11 removed with study codes allocated. The primary researcher will be blinded to treatment  
12 arm of the patient for analysis of the primary and secondary outcome data. A second  
13 senior researcher and supervisor will oversee data storage and analysis. Data will be  
14 stored in accordance with the Sydney Local Health District Ethics Review Committee and  
15 Centenary Institute.  
16  
17  
18  
19  
20  
21  
22  
23  
24

### 25 **Data analysis plan**

26  
27 Data will be analysed using Prism (version 7.0) and SPSS (Version 23.0). We will compare  
28 the primary outcome as a binary measure between the intervention and control group. We  
29 will use chi-square analyses using  $p < 0.05$  for statistical significance. For assessment of  
30 secondary outcomes we will be guided by published scoring systems for the validated  
31 scales to score genetics knowledge, satisfaction with services and genetic counselling  
32 outcomes. Mean scores for each scale will be compared between the intervention and  
33 control group and comparisons between the control and intervention group will be  
34 analysed using unpaired t-tests for continuous data and chi-square analysis for categorical  
35 data. Sub-group analysis will also be performed; specifically we will compare outcomes in  
36 the study groups stratified by the gene result (i.e. causative, uncertain or indeterminate  
37 results).  
38  
39  
40  
41  
42  
43  
44  
45  
46  
47  
48  
49  
50  
51  
52

## 53 **ETHICS AND DISSEMINATION**

### 54 **Ethics**

1 All aspects of the study will be performed according to institutional human research ethics  
2  
3 committee approval. This study has been approved by and is in strict accordance with the  
4  
5 Sydney Local Health District Ethics Review Committee (X16-0030).  
6  
7  
8  
9

## 10 **Dissemination**

11  
12 Results from this trial will be prepared as a manuscript and submitted to peer-reviewed  
13  
14 journals for publication. In addition, it will form part of the first authors' PhD thesis. Results  
15  
16 from the study will be submitted to international and national scientific sessions with the  
17  
18 aim of being presented. We will make a copy of the aid available to a wider genetic  
19  
20 audience for use in their clinical practice and study data will be available from the authors.  
21  
22  
23  
24  
25  
26  
27  
28  
29  
30  
31  
32  
33  
34  
35  
36  
37  
38  
39  
40  
41  
42  
43  
44  
45  
46  
47  
48  
49  
50  
51  
52  
53  
54  
55  
56  
57  
58  
59  
60

## ACKNOWLEDGEMENTS AND FUNDING

CB is the recipient of an Australia Postgraduate Award (APA). CS is the recipient of a National Health and Medical Research Council (NHMRC) Practitioner Fellowship (#1059156). JI is the recipient of a National Heart Foundation of Australia Future Leader Fellowship (#100833).

We thank Yana Smagarinsky for her assistance with developing the communication aid and Katharine Morgan for graphic design of the communication aid.

## AUTHOR STATEMENT

All authors contributed to the manuscript, specifically:

- (1) Substantial contributions to the conception or design of the work; or the acquisition, analysis, or interpretation of data for the work (CB, LY, CS, JI); AND
- (2) Drafting the work or revising it critically for important intellectual content (CB, LY, CS, JI); AND
- (3) Final approval of the version to be published (CB, LY, CS, JI); AND
- (4) Agreement to be accountable for all aspects of the work in ensuring that questions related to the accuracy or integrity of any part of the work are appropriately investigated and resolved (CB, LY, CS, JI).

## REFERENCES

1. Maron BJ, Maron MS, Semsarian C. Genetics of hypertrophic cardiomyopathy after 20 years: clinical perspectives. *Journal of the American College of Cardiology* 2012;**60**(8):705-15.
2. Semsarian C, Ingles J, Maron MS, et al. New perspectives on the prevalence of hypertrophic cardiomyopathy. *J Am Coll Cardiol* 2015;**65**(12):1249-54.
3. Ingles J, Burns C, Barratt A, et al. Application of Genetic Testing in Hypertrophic Cardiomyopathy for Preclinical Disease Detection. *Circ Cardiovasc Genet* 2015;**8**(6):852-9.
4. National Society of Genetic Counselors' Definition Task F, Resta R, Biesecker BB, et al. A new definition of Genetic Counseling: National Society of Genetic Counselors' Task Force report. *Journal of genetic counseling* 2006;**15**(2):77-83.
5. Semsarian C, Ingles J. A clinical approach to genetic testing for non-specialists. *BMJ* 2017;**358**:j4101.
6. Burns C, James C, Ingles J. Communication of genetic information to families with inherited rhythm disorders. *Heart rhythm* 2018;**15**(5):780-86.
7. Burns C, McGaughran J, Davis A, et al. Factors influencing uptake of familial long QT syndrome genetic testing. *Am J Med Genet A* 2016;**170A**(2):418-25.
8. Christiaans I, Birnie E, Bonse GJ, et al. Uptake of genetic counselling and predictive DNA testing in hypertrophic cardiomyopathy. *Eur J Hum Genet* 2008;**16**(10):1201-7.
9. Gaff CL, Clarke AJ, Atkinson P, et al. Process and outcome in communication of genetic information within families: a systematic review. *European journal of human genetics*. 2007;**15**(10):999-1011.
10. Claes E, Evers-Kiebooms G, Boogaerts A, et al. Communication with close and distant relatives in the context of genetic testing for hereditary breast and ovarian cancer in cancer patients. *American journal of medical genetics Part A* 2003;**116A**(1):11-9.
11. Barsevick AM, Montgomery SV, Ruth K, et al. Intention to communicate BRCA1/BRCA2 genetic test results to the family. *Journal of family psychology*. 2008;**22**(2):303-12.
12. Burns C, Yeates L, Spinks C, et al. Attitudes, knowledge and consequences of uncertain genetic findings in hypertrophic cardiomyopathy. *Eur J Hum Genet* 2017;**25**(7):809-15.
13. Patenaude AF, Tung N, Ryan PD, et al. Young adult daughters of BRCA1/2 positive mothers: what do they know about hereditary cancer and how much do they worry? *Psycho-oncology* 2013;**22**(9):2024-31.
14. Young AL, Butow PN, Vetsch J, et al. Family Communication, Risk Perception and Cancer Knowledge of Young Adults from BRCA1/2 Families: a Systematic Review. *Journal of genetic counseling* 2017;**26**(6):1179-96.

- 1 15. Forrest LE, Burke J, Bacic S, et al. Increased genetic counseling support improves  
2 communication of genetic information in families. *Genetics in medicine : official journal of*  
3 *the American College of Medical Genetics* 2008;**10**(3):167-72.
- 4  
5 16. Fiallos K, Applegate C, Mathews DJ, et al. Choices for return of primary and secondary  
6 genomic research results of 790 members of families with Mendelian disease. *European*  
7 *journal of human genetics*. 2017;**25**(5):530-37.
- 8  
9 17. Forrest K, Simpson SA, Wilson BJ, et al. To tell or not to tell: barriers and facilitators in  
10 family communication about genetic risk. *Clinical genetics* 2003;**64**(4):317-26.
- 11  
12 18. Montgomery SV, Barsevick AM, Egleston BL, et al. Preparing individuals to  
13 communicate genetic test results to their relatives: report of a randomized control trial.  
14 *Fam Cancer* 2013;**12**(3):537-46.
- 15  
16 19. Seymour KC, Addington-Hall J, Lucassen AM, et al. What Facilitates or Impedes  
17 Family Communication Following Genetic Testing for Cancer Risk? A Systematic Review  
18 and Meta-Synthesis of Primary Qualitative Research. *Journal of genetic counseling*  
19 2010;**19**(4):330-42.
- 20  
21 20. Healey E, Taylor N, Greening S, et al. Quantifying family dissemination and identifying  
22 barriers to communication of risk information in Australian BRCA families. *Genetics in*  
23 *medicine*. 2017;**19**(12):1323-31.
- 24  
25 21. Hodgson J, Metcalfe S, Gaff C, et al. Outcomes of a randomised controlled trial of a  
26 complex genetic counselling intervention to improve family communication. *European*  
27 *journal of human genetics*. 2016;**24**(3):356-60.
- 28  
29 22. Suthers GK, Armstrong J, McCormack J, et al. Letting the family know: balancing  
30 ethics and effectiveness when notifying relatives about genetic testing for a familial  
31 disorder. *Journal of medical genetics* 2006;**43**(8):665-70.
- 32  
33 23. Stacey D, Legare F, Lewis K, et al. Decision aids for people facing health treatment or  
34 screening decisions. *Cochrane Db Syst Rev* 2017(4).
- 35  
36 24. Wakefield CE, Meiser B, Homewood J, et al. Development and pilot testing of two  
37 decision aids for individuals considering genetic testing for cancer risk. *Journal of genetic*  
38 *counseling* 2007;**16**(3):325-39.
- 39  
40 25. Vavolizza RD, Kalia I, Aaron KE, et al. Disclosing Genetic Information to Family  
41 Members About Inherited Cardiac Arrhythmias: An Obligation or a Choice? *Journal of*  
42 *genetic counseling* 2015;**24**(4):608-15.
- 43  
44 26. Chan AW, Tetzlaff JM, Altman DG, et al. SPIRIT 2013 statement: defining standard  
45 protocol items for clinical trials. *Annals of internal medicine* 2013;**158**(3):200-7.
- 46  
47 27. Ingles J, Lind JM, Phongsavan P, et al. Psychosocial impact of specialized cardiac  
48 genetic clinics for hypertrophic cardiomyopathy. *Genet Med* 2008;**10**(2):117-20.
- 49  
50 28. Bagnall RD, Weintraub RG, Ingles J, et al. A Prospective Study of Sudden Cardiac  
51 Death among Children and Young Adults. *New Engl J Med* 2016;**374**(25):2441-52.
- 52  
53  
54  
55  
56  
57  
58  
59  
60

- 1  
2  
3  
4  
5  
6  
7  
8  
9  
10  
11  
12  
13  
14  
15  
16  
17  
18  
19  
20  
21  
22  
23  
24  
25  
26  
27  
28  
29  
30  
31  
32  
33  
34  
35  
36  
37  
38  
39  
40  
41  
42  
43  
44  
45  
46  
47  
48  
49  
50  
51  
52  
53  
54  
55  
56  
57  
58  
59  
60
29. Burns C, Bagnall RD, Lam L, et al. Multiple Gene Variants in Hypertrophic Cardiomyopathy in the Era of Next-Generation Sequencing. *Circ Cardiovasc Genet* 2017;**10**(4).
30. Richards S, Aziz N, Bale S, et al. Standards and guidelines for the interpretation of sequence variants: a joint consensus recommendation of the American College of Medical Genetics and Genomics and the Association for Molecular Pathology. *Genetics in Medicine* 2015;**17**(5):405-24.
31. Smagarinsky Y, Burns C, Spinks C, et al. Development of a communication aid for explaining hypertrophic cardiomyopathy genetic test results. *Pilot Feasibility Stud* 2017;**3**:53.
32. Read CY, Perry DJ, Duffy ME. Design and psychometric evaluation of the Psychological Adaptation to Genetic Information Scale. *J Nurs Scholarsh* 2005;**37**(3):203-8.
33. Kasparian NA, Wakefield CE, Meiser B. Assessment of psychosocial outcomes in genetic counseling research: an overview of available measurement scales. *Journal of genetic counseling* 2007;**16**(6):693-712.
34. Erbllich J, Brown K, Kim YM, et al. Development and validation of a breast cancer genetic counseling knowledge questionnaire. *Patient Educ Couns* 2005;**56**(2):182-91.
35. Shiloh S, Avdor O, Goodman RM. Satisfaction with genetic counseling: dimensions and measurement. *American journal of medical genetics* 1990;**37**(4):522-9.
36. McAllister M, Wood AM, Dunn G, et al. The Genetic Counseling Outcome Scale: a new patient-reported outcome measure for clinical genetics services. *Clinical genetics* 2011;**79**(5):413-24.

**Table 1: Trial Registration Data**

|                                               |                                                                                                                                                                         |
|-----------------------------------------------|-------------------------------------------------------------------------------------------------------------------------------------------------------------------------|
| Primary registry and trial identifying number | Australian New Zealand Clinical Trials Registry:<br>ACTRN12617000706370                                                                                                 |
| Date of registration in primary registry      | 17/05/2017                                                                                                                                                              |
| Secondary identifying numbers                 | NA                                                                                                                                                                      |
| Source(s) of monetary or material support     | National Heart Foundation of Australia                                                                                                                                  |
| Primary sponsor                               | The University of Sydney                                                                                                                                                |
| Secondary sponsor                             | NA                                                                                                                                                                      |
| Contact for public queries                    | Dr Jodie Ingles<br><a href="mailto:j.ingles@centenary.org.au">j.ingles@centenary.org.au</a>                                                                             |
| Contact for scientific queries                | Dr Jodie Ingles<br><a href="mailto:j.ingles@centenary.org.au">j.ingles@centenary.org.au</a>                                                                             |
| Public title                                  | Use of an aid to improve communication of genetic risk information to families with hypertrophic cardiomyopathy (HCM)                                                   |
| Scientific title                              | Use of a custom designed aid to improve communication of genetic results in families with HCM                                                                           |
| Countries of recruitment                      | Australia                                                                                                                                                               |
| Health condition (s) or problem (s) studied   | HCM                                                                                                                                                                     |
| Intervention                                  | Use of a custom designed aid to communicate HCM genetic test results                                                                                                    |
| Key inclusion and exclusion criteria          | HCM probands with a genetic result ready for return<br>Participants must be aged 18 years or older<br>Sufficient written English skills as nominated by the participant |
| Study type                                    | Prospective randomised controlled trial                                                                                                                                 |
| Date of first enrolment                       | 25/11/2016                                                                                                                                                              |
| Target sample size                            | 45                                                                                                                                                                      |
| Recruitment status                            | Recruiting                                                                                                                                                              |
| Primary outcome (s)                           | Ability and confidence of the proband to communicate genetic results to at-risk relatives                                                                               |
| Key secondary outcomes                        | Secondary outcomes will assess genetic knowledge, satisfaction with services, outcomes from genetic counselling and psychological adaptation to genetic information     |

---

**Table 2: Certainty sub-scale of the PAGIS scale**

---

1. I understand how I came to have hypertrophic cardiomyopathy
  2. I understand the health risks my relatives face because of hypertrophic cardiomyopathy
  3. I feel certain that I understand the meaning of having hypertrophic cardiomyopathy
  4. I understand the chances I have of passing hypertrophic cardiomyopathy along to my children
  5. I feel that I can explain to other people what having hypertrophic cardiomyopathy means
  6. I feel confused because I have been given different explanations of what having hypertrophic cardiomyopathy means
- 

Abbreviations: PAGIS = Psychological Adaptation to Genetic Information Scale.



---

**Table 3: Primary outcome measure converted to a primary outcome**

---

Measures incorporated

1. Certainty sub scale from PAGIS (measuring confidence)
2. Adult first degree relatives informed of genetic risk (measuring ability)

### Calculation examples

#### Example 1:

Certainty score from PAGIS sub scale =  $18/36 = 0.5$

Relatives informed of risk =  $3/6 = 0.5$

=  $(0.5 + 0.5 = 1) / 2 = 0.5$

= 50%

Therefore this participant falls into the 'poor communication' category of the primary outcome

#### Example 2:

Certainty score from PAGIS sub scale =  $30/36 = 0.83$

Relatives informed of risk =  $7/8 = 0.88$

$(0.88 + 0.83) / 2 = 0.86$

= 86%

Therefore this participant falls into the 'fair communication' category of this primary outcome

---

Abbreviations: PAGIS = Psychological Adaptation to Genetic Information Scale.

1  
2  
3 **FIGURE LEGENDS**  
4  
5  
6

7 **FIGURE 1:** Flow chart of overall study design  
8  
9

10  
11 **FIGURE 2:** Example page from communication aid: Genetic testing step by step  
12  
13

14  
15 **FIGURE 3:** Example page from communication aid: What is my genetic result?  
16  
17

18  
19  
20 **FIGURE 4:** Example page from communication aid: Family-screening guidelines  
21  
22  
23  
24  
25  
26  
27  
28  
29  
30  
31  
32  
33  
34  
35  
36  
37  
38  
39  
40  
41  
42  
43  
44  
45  
46  
47  
48  
49  
50  
51  
52  
53  
54  
55  
56  
57  
58  
59  
60

1  
2  
3  
4  
5  
6  
7  
8  
9  
10  
11  
12  
13  
14  
15  
16  
17  
18  
19  
20  
21  
22  
23  
24  
25  
26  
27  
28  
29  
30  
31  
32  
33  
34  
35  
36  
37  
38  
39  
40  
41  
42  
43  
44  
45  
46  
47  
48  
49  
50  
51  
52  
53  
54  
55  
56  
57  
58  
59  
60

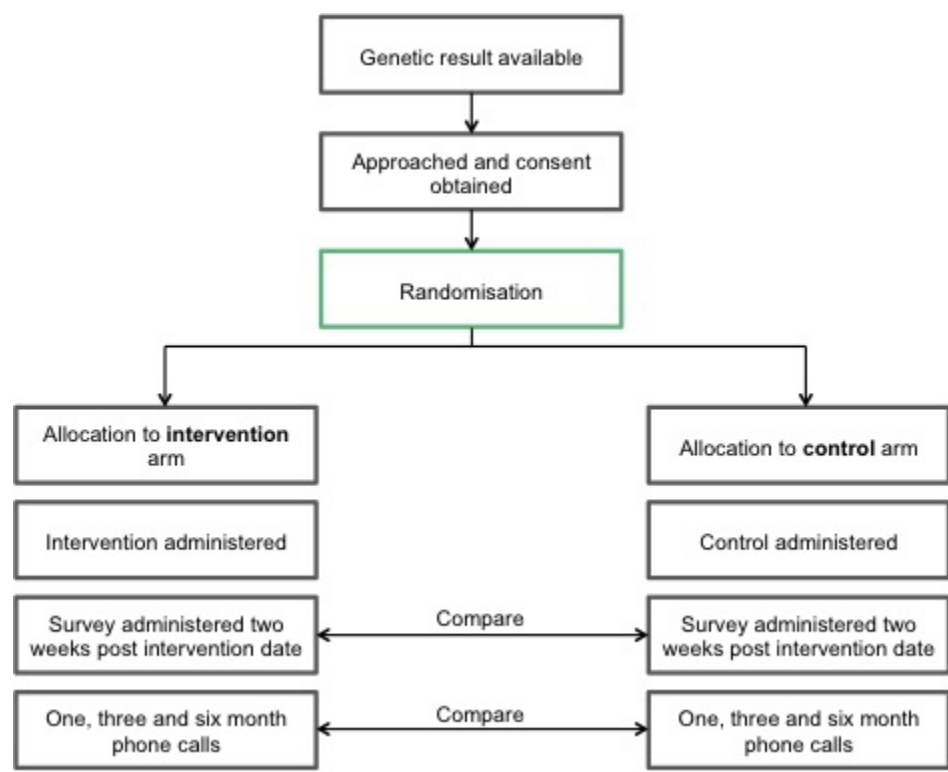

FIGURE 1: Flow chart of overall study design

165x133mm (72 x 72 DPI)

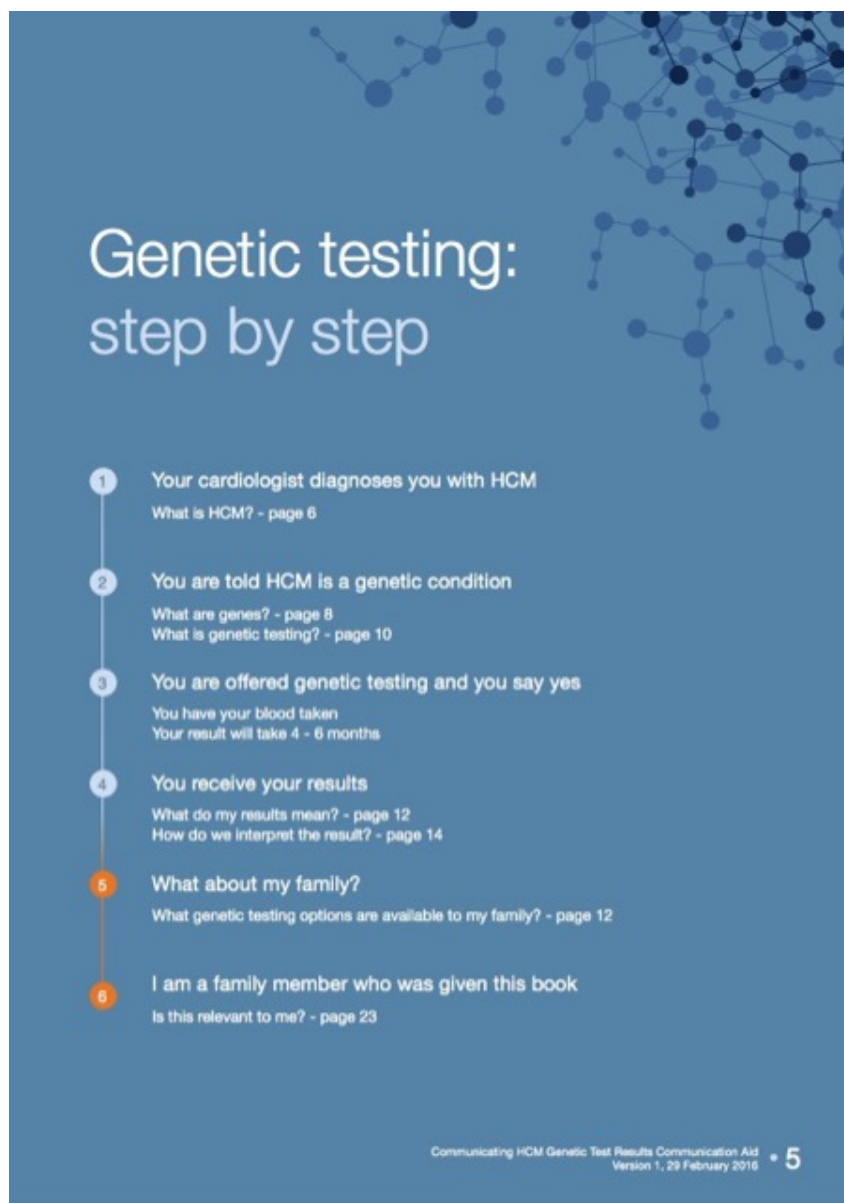

FIGURE 2: Example page from communication aid: Genetic testing step by step

159x225mm (72 x 72 DPI)

FIGURE 3

## What is my genetic result?

| Test Result                                     | The Impact for You                                                                                           | The Impact for Your Family                                                                                      |
|-------------------------------------------------|--------------------------------------------------------------------------------------------------------------|-----------------------------------------------------------------------------------------------------------------|
| Pathogenic (page 18)                            | This result is considered to be the definite cause of your disease.                                          | We can look for the same variant in family members (cascade genetic testing).                                   |
| Likely (probably) pathogenic (page 18)          | This result is considered to be important and with the available evidence is thought to be the cause of HCM. | We can look for the same variant in family members (cascade genetic testing).                                   |
| Variant of unknown significance (VUS) (page 20) | Currently we do not know if this variant is the cause of HCM or not. More evidence is needed.                | Continue with current clinical screening guidelines, no cascade genetic testing options available at this time. |
| Benign or likely benign (page 16)               | This variant is not the cause of HCM.                                                                        | Continue with current clinical screening guidelines, no cascade genetic testing options available at this time. |
| No variant identified (indeterminate) (page 15) | No HCM variants have been identified.                                                                        | Continue with current clinical screening guidelines, no cascade genetic testing options available at this time. |

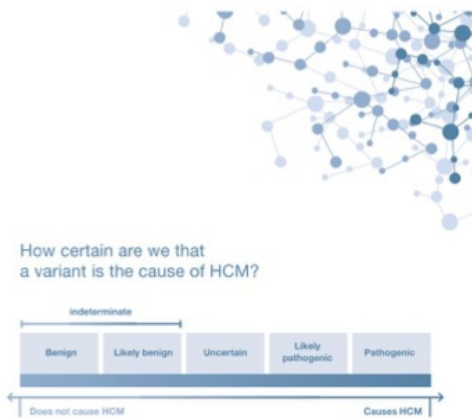

FIGURE 3: Example page from communication aid: What is my genetic result?

254x190mm (72 x 72 DPI)

### Clinical screening guidelines for family members

| Family member's age | How often you should see a cardiologist |
|---------------------|-----------------------------------------|
| 0 - 5 years         | Optional                                |
| 6 - 10 years        | Every 3 - 5 years                       |
| 11 - 20 years       | Every 12 - 18 months                    |
| 21 - 30 years       | Every 2 - 3 years                       |
| 31 or more years    | Every 3 - 5 years                       |

This only applies to first-degree relatives (i.e. parents, brother/sister and children) of someone with HCM. If anyone in the family is having any symptoms suggesting a heart problem, they should see a cardiologist.

Worksheet



## My family summary

Sharing this booklet with family members is encouraged.

**If you're a family member reading this booklet, hopefully you will find some details below that apply directly to you.**

All first-degree relatives of someone with HCM are recommended to have clinical screening to check for signs of HCM. This includes children, brothers/sisters and parents.

Clinical screening involves: echocardiogram (ultrasound of the heart) electrocardiogram (or ECG, an electrical trace of the heart rhythm), and physical examination with a cardiologist.

| First name | Relation | Age | Clinical Screening | Genetic testing possibilities |
|------------|----------|-----|--------------------|-------------------------------|
|            |          |     |                    |                               |
|            |          |     |                    |                               |
|            |          |     |                    |                               |
|            |          |     |                    |                               |
|            |          |     |                    |                               |
|            |          |     |                    |                               |
|            |          |     |                    |                               |
|            |          |     |                    |                               |

FIGURE 4: Example page from communication aid: Family-screening guidelines  
245x145mm (72 x 72 DPI)

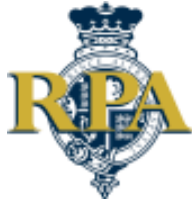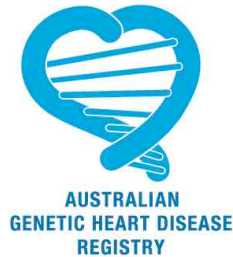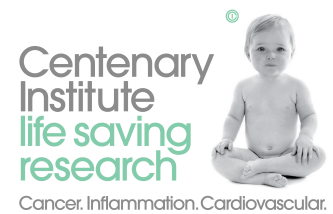

# Communicating Hypertrophic Cardiomyopathy (HCM) Genetic Test Results

## INFORMATION FOR PARTICIPANTS

### Introduction

You are invited to take part in a research study examining how we can best communicate genetic test results in hypertrophic cardiomyopathy (HCM). Genetic testing for genetic heart diseases like HCM has become increasingly complex and our method of explaining these results needs to evolve to meet these changing needs. Cardiac genetic counsellors coordinate the genetic testing process and they play a key role in ensuring the information you are receiving is clear and meaningful for you and your family. The objective of this study is to compare the effectiveness of an intervention aimed at improving the way we communicate genetic test result information with our current usual care. If you consent to the study, you will be randomly assigned to either the new communication intervention or to usual care.

Individuals with hypertrophic cardiomyopathy are eligible to participate in this study if they are the first in their family to have genetic testing. People aged 16 years or older are eligible to participate; however children younger than this are excluded.

The study is being conducted by Dr Jodie Ingles, Prof Christopher Semsarian, Ms Laura Yeates and Ms Charlotte Burns from the Molecular Cardiology Research Program, Centenary Institute and Royal Prince Alfred Hospital Sydney.

### Study Procedures

If you agree to participate in this study, you will be asked to complete the participant consent form. You will then be randomly allocated to one of two groups, to receive your genetic test result. Two weeks after your genetic test result appointment, you will be asked to complete a survey (*either paper or online*), asking about your understanding of genetic testing for HCM. This survey will take between 10-20 minutes to complete.

**In addition, the researchers would like to phone you at one, three and six month intervals to follow up with you after you receive your genetic result. These phone calls will take approximately 10 minutes and will be conducted at a time that suits you.**

1 Researchers will have access to your medical record to obtain information relevant  
2 to this study. Information about you may also be sought from the *Australian Genetic*  
3 *Heart Disease Registry*, if you have enrolled ([www.heartregistry.org.au](http://www.heartregistry.org.au)).  
4 Confidentiality of the survey responses will be paramount. Your name will be  
5 replaced with a unique code and only Dr Jodie Ingles will have access to the true  
6 identity of respondents.  
7

8  
9 No additional genetic testing will be carried out as part of this study.

10  
11 Information collected about you will be securely stored.  
12

### 13 **Benefits**

14  
15 While we intend that this research study furthers medical knowledge and may  
16 improve management of genetic heart diseases in the future, it may not be of direct  
17 benefit to you.  
18

### 19 **Voluntary Participation**

20  
21 Participation in this study is entirely voluntary. You do not have to take part in it. If  
22 you do take part, you can withdraw at any time without having to give a reason.  
23 Whatever your decision, please be assured that it will not affect your medical  
24 treatment or your relationship with the staff who are caring for you.  
25

### 26 **Confidentiality**

27  
28 All of the information collected from you for the study will be treated confidentially,  
29 and only the researchers named above will have access to it. The study results may  
30 be presented at a conference or in a scientific publication, but individual participants  
31 will not be identifiable in such a presentation.  
32

33  
34 Any forms completed online, including the participant consent form and survey will  
35 be extremely secure to maintain participant privacy.  
36

### 37 **Further Information**

38  
39 When you have read this information, one of the investigators is available to discuss  
40 it with you further and answer any questions you may have. If you would like to  
41 know more at any stage, please feel free to contact:  
42

#### 43 ***Dr Jodie Ingles***

44 Molecular Cardiology Research Program

45 Centenary Institute

46 Locked Bag No 6, Newtown NSW 2042

47 Ph. 02 9565 6293

48 Email. [j.ingles@centenary.org.au](mailto:j.ingles@centenary.org.au) Web. [www.heartregistry.org.au](http://www.heartregistry.org.au)  
49

50  
51 This information sheet is for you to keep.  
52

### 53 **Ethics Approval and Complaints**



1 This study has been approved by the Ethics Review Committee (RPAH Zone) of the  
2 Sydney Local Health District. Any person with concerns or complaints about the  
3 conduct of this study should contact the Executive Officer on 02 9515 6766 and quote  
4 protocol number X16-0030.  
5  
6  
7  
8  
9  
10  
11  
12  
13  
14  
15  
16  
17  
18  
19  
20  
21  
22  
23  
24  
25  
26  
27  
28  
29  
30  
31  
32  
33  
34  
35  
36  
37  
38  
39  
40  
41  
42  
43  
44  
45  
46  
47  
48  
49  
50  
51  
52  
53  
54  
55  
56  
57  
58  
59  
60

For peer review only

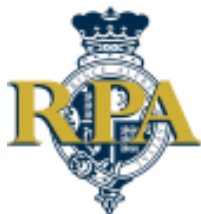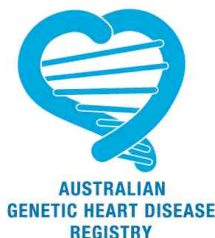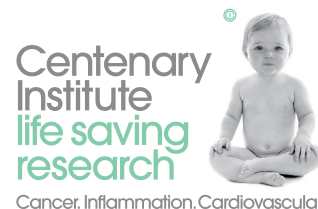

# Communicating Hypertrophic Cardiomyopathy (HCM) Genetic Test Results

## PARTICIPANT CONSENT FORM

I, ..... [name]  
 of ..... [address]  
 ..... [email]

have read and understood the Information for Participants on the abovenamed research study  
 and have discussed the study with .....

I have been made aware of the procedures involved in the study.

I understand that my participation in this study will allow the researchers to have access to my  
 medical record, including information held by the Australian Genetic Heart Disease Registry (if  
 I am enrolled), and I agree to this.

I freely choose to participate in this study and understand that I can withdraw at any time.

I also understand that the research study is strictly confidential.

I hereby agree to participate in this research study.

**NAME:** .....

**SIGNATURE:** .....

**DATE:** .....

**NAME OF WITNESS:** .....

**SIGNATURE OF WITNESS:** .....

# Reporting checklist for protocol of a clinical trial.

Based on the SPIRIT guidelines.

## Instructions to authors

Complete this checklist by entering the page numbers from your manuscript where readers will find each of the items listed below.

Your article may not currently address all the items on the checklist. Please modify your text to include the missing information. If you are certain that an item does not apply, please write "n/a" and provide a short explanation.

Upload your completed checklist as an extra file when you submit to a journal.

In your methods section, say that you used the SPIRIT reporting guidelines, and cite them as:

Chan A-W, Tetzlaff JM, Altman DG, Laupacis A, Gøtzsche PC, Krleža-Jerić K, Hróbjartsson A, Mann H, Dickersin K, Berlin J, Doré C, Parulekar W, Summerskill W, Groves T, Schulz K, Sox H, Rockhold FW, Rennie D, Moher D. SPIRIT 2013 Statement: Defining standard protocol items for clinical trials. *Ann Intern Med.* 2013;158(3):200-207

|                                             |                     | Reporting Item                                                                                               | Page Number                  |
|---------------------------------------------|---------------------|--------------------------------------------------------------------------------------------------------------|------------------------------|
| Title                                       | <a href="#">#1</a>  | Descriptive title identifying the study design, population, interventions, and, if applicable, trial acronym | <b>1</b>                     |
| Trial registration                          | <a href="#">#2a</a> | Trial identifier and registry name. If not yet registered, name of intended registry                         | <b>2, Table 1</b>            |
| Trial registration: data set                | <a href="#">#2b</a> | All items from the World Health Organization Trial Registration Data Set                                     | <b>9, Table 1</b>            |
| Protocol version                            | <a href="#">#3</a>  | Date and version identifier                                                                                  | <b>1</b>                     |
| Funding                                     | <a href="#">#4</a>  | Sources and types of financial, material, and other support                                                  | <b>18</b>                    |
| Roles and responsibilities: contributorship | <a href="#">#5a</a> | Names, affiliations, and roles of protocol contributors                                                      | <b>1, 18</b>                 |
| Roles and                                   | <a href="#">#5b</a> | Name and contact information for the trial                                                                   | <b>NA- No trial sponsor.</b> |

|    |                   |                     |                                              |                               |
|----|-------------------|---------------------|----------------------------------------------|-------------------------------|
| 1  | responsibilities: |                     | sponsor                                      |                               |
| 2  | sponsor contact   |                     |                                              |                               |
| 3  | information       |                     |                                              |                               |
| 4  |                   |                     |                                              |                               |
| 5  | Roles and         | <a href="#">#5c</a> | Role of study sponsor and funders, if any,   | <b>NA- no role other than</b> |
| 6  | responsibilities: |                     | in study design; collection, management,     | <b>funding for key</b>        |
| 7  | sponsor and       |                     | analysis, and interpretation of data;        | <b>researchers.</b>           |
| 8  | funder            |                     | writing of the report; and the decision to   |                               |
| 9  |                   |                     | submit the report for publication, including |                               |
| 10 |                   |                     | whether they will have ultimate authority    |                               |
| 11 |                   |                     | over any of these activities                 |                               |
| 12 |                   |                     |                                              |                               |
| 13 |                   |                     |                                              |                               |
| 14 |                   |                     |                                              |                               |
| 15 |                   |                     |                                              |                               |
| 16 | Roles and         | <a href="#">#5d</a> | Composition, roles, and responsibilities of  | <b>NA</b>                     |
| 17 | responsibilities: |                     | the coordinating centre, steering            |                               |
| 18 | committees        |                     | committee, endpoint adjudication             |                               |
| 19 |                   |                     | committee, data management team, and         |                               |
| 20 |                   |                     | other individuals or groups overseeing       |                               |
| 21 |                   |                     | the trial, if applicable (see Item 21a for   |                               |
| 22 |                   |                     | data monitoring committee)                   |                               |
| 23 |                   |                     |                                              |                               |
| 24 |                   |                     |                                              |                               |
| 25 |                   |                     |                                              |                               |
| 26 |                   |                     |                                              |                               |
| 27 |                   |                     |                                              |                               |
| 28 | Background and    | <a href="#">#6a</a> | Description of research question and         | <b>4</b>                      |
| 29 | rationale         |                     | justification for undertaking the trial,     |                               |
| 30 |                   |                     | including summary of relevant studies        |                               |
| 31 |                   |                     | (published and unpublished) examining        |                               |
| 32 |                   |                     | benefits and harms for each intervention     |                               |
| 33 |                   |                     |                                              |                               |
| 34 |                   |                     |                                              |                               |
| 35 |                   |                     |                                              |                               |
| 36 | Background and    | <a href="#">#6b</a> | Explanation for choice of comparators        | <b>11</b>                     |
| 37 | rationale: choice |                     |                                              |                               |
| 38 | of comparators    |                     |                                              |                               |
| 39 |                   |                     |                                              |                               |
| 40 |                   |                     |                                              |                               |
| 41 | Objectives        | <a href="#">#7</a>  | Specific objectives or hypotheses            | <b>7,8</b>                    |
| 42 |                   |                     |                                              |                               |
| 43 |                   |                     |                                              |                               |
| 44 | Trial design      | <a href="#">#8</a>  | Description of trial design including type   | <b>9</b>                      |
| 45 |                   |                     | of trial (eg, parallel group, crossover,     |                               |
| 46 |                   |                     | factorial, single group), allocation ratio,  |                               |
| 47 |                   |                     | and framework (eg, superiority,              |                               |
| 48 |                   |                     | equivalence, non-inferiority, exploratory)   |                               |
| 49 |                   |                     |                                              |                               |
| 50 |                   |                     |                                              |                               |
| 51 |                   |                     |                                              |                               |
| 52 | Study setting     | <a href="#">#9</a>  | Description of study settings (eg,           | <b>9</b>                      |
| 53 |                   |                     | community clinic, academic hospital) and     |                               |
| 54 |                   |                     | list of countries where data will be         |                               |
| 55 |                   |                     | collected. Reference to where list of study  |                               |
| 56 |                   |                     | sites can be obtained                        |                               |
| 57 |                   |                     |                                              |                               |
| 58 |                   |                     |                                              |                               |
| 59 |                   |                     |                                              |                               |
| 60 |                   |                     |                                              |                               |

|    |                      |                      |                                                                                                                                                                                                                                                                                                                                                                                |                                                    |
|----|----------------------|----------------------|--------------------------------------------------------------------------------------------------------------------------------------------------------------------------------------------------------------------------------------------------------------------------------------------------------------------------------------------------------------------------------|----------------------------------------------------|
| 1  | Eligibility criteria | <a href="#">#10</a>  | Inclusion and exclusion criteria for participants. If applicable, eligibility criteria for study centres and individuals who will perform the interventions (eg, surgeons, psychotherapists)                                                                                                                                                                                   | <b>9</b>                                           |
| 2  |                      |                      |                                                                                                                                                                                                                                                                                                                                                                                |                                                    |
| 3  |                      |                      |                                                                                                                                                                                                                                                                                                                                                                                |                                                    |
| 4  |                      |                      |                                                                                                                                                                                                                                                                                                                                                                                |                                                    |
| 5  |                      |                      |                                                                                                                                                                                                                                                                                                                                                                                |                                                    |
| 6  |                      |                      |                                                                                                                                                                                                                                                                                                                                                                                |                                                    |
| 7  |                      |                      |                                                                                                                                                                                                                                                                                                                                                                                |                                                    |
| 8  |                      |                      |                                                                                                                                                                                                                                                                                                                                                                                |                                                    |
| 9  | Interventions:       | <a href="#">#11a</a> | Interventions for each group with sufficient detail to allow replication, including how and when they will be administered                                                                                                                                                                                                                                                     | <b>11</b>                                          |
| 10 | description          |                      |                                                                                                                                                                                                                                                                                                                                                                                |                                                    |
| 11 |                      |                      |                                                                                                                                                                                                                                                                                                                                                                                |                                                    |
| 12 |                      |                      |                                                                                                                                                                                                                                                                                                                                                                                |                                                    |
| 13 |                      |                      |                                                                                                                                                                                                                                                                                                                                                                                |                                                    |
| 14 |                      |                      |                                                                                                                                                                                                                                                                                                                                                                                |                                                    |
| 15 |                      |                      |                                                                                                                                                                                                                                                                                                                                                                                |                                                    |
| 16 | Interventions:       | <a href="#">#11b</a> | Criteria for discontinuing or modifying allocated interventions for a given trial participant (eg, drug dose change in response to harms, participant request, or improving / worsening disease)                                                                                                                                                                               | <b>NA</b>                                          |
| 17 | modifications        |                      |                                                                                                                                                                                                                                                                                                                                                                                |                                                    |
| 18 |                      |                      |                                                                                                                                                                                                                                                                                                                                                                                |                                                    |
| 19 |                      |                      |                                                                                                                                                                                                                                                                                                                                                                                |                                                    |
| 20 |                      |                      |                                                                                                                                                                                                                                                                                                                                                                                |                                                    |
| 21 |                      |                      |                                                                                                                                                                                                                                                                                                                                                                                |                                                    |
| 22 |                      |                      |                                                                                                                                                                                                                                                                                                                                                                                |                                                    |
| 23 |                      |                      |                                                                                                                                                                                                                                                                                                                                                                                |                                                    |
| 24 | Interventions:       | <a href="#">#11c</a> | Strategies to improve adherence to intervention protocols, and any procedures for monitoring adherence (eg, drug tablet return; laboratory tests)                                                                                                                                                                                                                              | <b>NA- intervention was one clinic appointment</b> |
| 25 | adherence            |                      |                                                                                                                                                                                                                                                                                                                                                                                |                                                    |
| 26 |                      |                      |                                                                                                                                                                                                                                                                                                                                                                                |                                                    |
| 27 |                      |                      |                                                                                                                                                                                                                                                                                                                                                                                |                                                    |
| 28 |                      |                      |                                                                                                                                                                                                                                                                                                                                                                                |                                                    |
| 29 |                      |                      |                                                                                                                                                                                                                                                                                                                                                                                |                                                    |
| 30 |                      |                      |                                                                                                                                                                                                                                                                                                                                                                                |                                                    |
| 31 | Interventions:       | <a href="#">#11d</a> | Relevant concomitant care and interventions that are permitted or prohibited during the trial                                                                                                                                                                                                                                                                                  | <b>NA</b>                                          |
| 32 | concomitant care     |                      |                                                                                                                                                                                                                                                                                                                                                                                |                                                    |
| 33 |                      |                      |                                                                                                                                                                                                                                                                                                                                                                                |                                                    |
| 34 |                      |                      |                                                                                                                                                                                                                                                                                                                                                                                |                                                    |
| 35 |                      |                      |                                                                                                                                                                                                                                                                                                                                                                                |                                                    |
| 36 | Outcomes             | <a href="#">#12</a>  | Primary, secondary, and other outcomes, including the specific measurement variable (eg, systolic blood pressure), analysis metric (eg, change from baseline, final value, time to event), method of aggregation (eg, median, proportion), and time point for each outcome. Explanation of the clinical relevance of chosen efficacy and harm outcomes is strongly recommended | <b>12,13,14</b>                                    |
| 37 |                      |                      |                                                                                                                                                                                                                                                                                                                                                                                |                                                    |
| 38 |                      |                      |                                                                                                                                                                                                                                                                                                                                                                                |                                                    |
| 39 |                      |                      |                                                                                                                                                                                                                                                                                                                                                                                |                                                    |
| 40 |                      |                      |                                                                                                                                                                                                                                                                                                                                                                                |                                                    |
| 41 |                      |                      |                                                                                                                                                                                                                                                                                                                                                                                |                                                    |
| 42 |                      |                      |                                                                                                                                                                                                                                                                                                                                                                                |                                                    |
| 43 |                      |                      |                                                                                                                                                                                                                                                                                                                                                                                |                                                    |
| 44 |                      |                      |                                                                                                                                                                                                                                                                                                                                                                                |                                                    |
| 45 |                      |                      |                                                                                                                                                                                                                                                                                                                                                                                |                                                    |
| 46 |                      |                      |                                                                                                                                                                                                                                                                                                                                                                                |                                                    |
| 47 |                      |                      |                                                                                                                                                                                                                                                                                                                                                                                |                                                    |
| 48 |                      |                      |                                                                                                                                                                                                                                                                                                                                                                                |                                                    |
| 49 |                      |                      |                                                                                                                                                                                                                                                                                                                                                                                |                                                    |
| 50 |                      |                      |                                                                                                                                                                                                                                                                                                                                                                                |                                                    |
| 51 |                      |                      |                                                                                                                                                                                                                                                                                                                                                                                |                                                    |
| 52 | Participant          | <a href="#">#13</a>  | Time schedule of enrolment, interventions (including any run-ins and washouts), assessments, and visits for participants. A schematic diagram is highly recommended (see Figure)                                                                                                                                                                                               | <b>8, Figure 1</b>                                 |
| 53 | timeline             |                      |                                                                                                                                                                                                                                                                                                                                                                                |                                                    |
| 54 |                      |                      |                                                                                                                                                                                                                                                                                                                                                                                |                                                    |
| 55 |                      |                      |                                                                                                                                                                                                                                                                                                                                                                                |                                                    |
| 56 |                      |                      |                                                                                                                                                                                                                                                                                                                                                                                |                                                    |
| 57 |                      |                      |                                                                                                                                                                                                                                                                                                                                                                                |                                                    |
| 58 |                      |                      |                                                                                                                                                                                                                                                                                                                                                                                |                                                    |
| 59 |                      |                      |                                                                                                                                                                                                                                                                                                                                                                                |                                                    |

|    |                                                   |                      |                                                                                                                                                                                                                                                                                                                                                          |                                                                                                                                       |
|----|---------------------------------------------------|----------------------|----------------------------------------------------------------------------------------------------------------------------------------------------------------------------------------------------------------------------------------------------------------------------------------------------------------------------------------------------------|---------------------------------------------------------------------------------------------------------------------------------------|
| 1  | Sample size                                       | <a href="#">#14</a>  | Estimated number of participants needed to achieve study objectives and how it was determined, including clinical and statistical assumptions supporting any sample size calculations                                                                                                                                                                    | <b>10</b>                                                                                                                             |
| 2  |                                                   |                      |                                                                                                                                                                                                                                                                                                                                                          |                                                                                                                                       |
| 3  |                                                   |                      |                                                                                                                                                                                                                                                                                                                                                          |                                                                                                                                       |
| 4  |                                                   |                      |                                                                                                                                                                                                                                                                                                                                                          |                                                                                                                                       |
| 5  |                                                   |                      |                                                                                                                                                                                                                                                                                                                                                          |                                                                                                                                       |
| 6  |                                                   |                      |                                                                                                                                                                                                                                                                                                                                                          |                                                                                                                                       |
| 7  |                                                   |                      |                                                                                                                                                                                                                                                                                                                                                          |                                                                                                                                       |
| 8  |                                                   |                      |                                                                                                                                                                                                                                                                                                                                                          |                                                                                                                                       |
| 9  | Recruitment                                       | <a href="#">#15</a>  | Strategies for achieving adequate participant enrolment to reach target sample size                                                                                                                                                                                                                                                                      | <b>9</b>                                                                                                                              |
| 10 |                                                   |                      |                                                                                                                                                                                                                                                                                                                                                          |                                                                                                                                       |
| 11 |                                                   |                      |                                                                                                                                                                                                                                                                                                                                                          |                                                                                                                                       |
| 12 |                                                   |                      |                                                                                                                                                                                                                                                                                                                                                          |                                                                                                                                       |
| 13 |                                                   |                      |                                                                                                                                                                                                                                                                                                                                                          |                                                                                                                                       |
| 14 | Allocation:<br>sequence<br>generation             | <a href="#">#16a</a> | Method of generating the allocation sequence (eg, computer-generated random numbers), and list of any factors for stratification. To reduce predictability of a random sequence, details of any planned restriction (eg, blocking) should be provided in a separate document that is unavailable to those who enrol participants or assign interventions | <b>9,10</b>                                                                                                                           |
| 15 |                                                   |                      |                                                                                                                                                                                                                                                                                                                                                          |                                                                                                                                       |
| 16 |                                                   |                      |                                                                                                                                                                                                                                                                                                                                                          |                                                                                                                                       |
| 17 |                                                   |                      |                                                                                                                                                                                                                                                                                                                                                          |                                                                                                                                       |
| 18 |                                                   |                      |                                                                                                                                                                                                                                                                                                                                                          |                                                                                                                                       |
| 19 |                                                   |                      |                                                                                                                                                                                                                                                                                                                                                          |                                                                                                                                       |
| 20 |                                                   |                      |                                                                                                                                                                                                                                                                                                                                                          |                                                                                                                                       |
| 21 |                                                   |                      |                                                                                                                                                                                                                                                                                                                                                          |                                                                                                                                       |
| 22 |                                                   |                      |                                                                                                                                                                                                                                                                                                                                                          |                                                                                                                                       |
| 23 |                                                   |                      |                                                                                                                                                                                                                                                                                                                                                          |                                                                                                                                       |
| 24 |                                                   |                      |                                                                                                                                                                                                                                                                                                                                                          |                                                                                                                                       |
| 25 |                                                   |                      |                                                                                                                                                                                                                                                                                                                                                          |                                                                                                                                       |
| 26 |                                                   |                      |                                                                                                                                                                                                                                                                                                                                                          |                                                                                                                                       |
| 27 |                                                   |                      |                                                                                                                                                                                                                                                                                                                                                          |                                                                                                                                       |
| 28 |                                                   |                      |                                                                                                                                                                                                                                                                                                                                                          |                                                                                                                                       |
| 29 | Allocation<br>concealment<br>mechanism            | <a href="#">#16b</a> | Mechanism of implementing the allocation sequence (eg, central telephone; sequentially numbered, opaque, sealed envelopes), describing any steps to conceal the sequence until interventions are assigned                                                                                                                                                | <b>9,10</b>                                                                                                                           |
| 30 |                                                   |                      |                                                                                                                                                                                                                                                                                                                                                          |                                                                                                                                       |
| 31 |                                                   |                      |                                                                                                                                                                                                                                                                                                                                                          |                                                                                                                                       |
| 32 |                                                   |                      |                                                                                                                                                                                                                                                                                                                                                          |                                                                                                                                       |
| 33 |                                                   |                      |                                                                                                                                                                                                                                                                                                                                                          |                                                                                                                                       |
| 34 |                                                   |                      |                                                                                                                                                                                                                                                                                                                                                          |                                                                                                                                       |
| 35 |                                                   |                      |                                                                                                                                                                                                                                                                                                                                                          |                                                                                                                                       |
| 36 |                                                   |                      |                                                                                                                                                                                                                                                                                                                                                          |                                                                                                                                       |
| 37 |                                                   |                      |                                                                                                                                                                                                                                                                                                                                                          |                                                                                                                                       |
| 38 |                                                   |                      |                                                                                                                                                                                                                                                                                                                                                          |                                                                                                                                       |
| 39 | Allocation:<br>implementation                     | <a href="#">#16c</a> | Who will generate the allocation sequence, who will enrol participants, and who will assign participants to interventions                                                                                                                                                                                                                                | <b>9,10</b>                                                                                                                           |
| 40 |                                                   |                      |                                                                                                                                                                                                                                                                                                                                                          |                                                                                                                                       |
| 41 |                                                   |                      |                                                                                                                                                                                                                                                                                                                                                          |                                                                                                                                       |
| 42 |                                                   |                      |                                                                                                                                                                                                                                                                                                                                                          |                                                                                                                                       |
| 43 |                                                   |                      |                                                                                                                                                                                                                                                                                                                                                          |                                                                                                                                       |
| 44 |                                                   |                      |                                                                                                                                                                                                                                                                                                                                                          |                                                                                                                                       |
| 45 | Blinding (masking)                                | <a href="#">#17a</a> | Who will be blinded after assignment to interventions (eg, trial participants, care providers, outcome assessors, data analysts), and how                                                                                                                                                                                                                | <b>15</b>                                                                                                                             |
| 46 |                                                   |                      |                                                                                                                                                                                                                                                                                                                                                          |                                                                                                                                       |
| 47 |                                                   |                      |                                                                                                                                                                                                                                                                                                                                                          |                                                                                                                                       |
| 48 |                                                   |                      |                                                                                                                                                                                                                                                                                                                                                          |                                                                                                                                       |
| 49 |                                                   |                      |                                                                                                                                                                                                                                                                                                                                                          |                                                                                                                                       |
| 50 |                                                   |                      |                                                                                                                                                                                                                                                                                                                                                          |                                                                                                                                       |
| 51 |                                                   |                      |                                                                                                                                                                                                                                                                                                                                                          |                                                                                                                                       |
| 52 | Blinding<br>(masking):<br>emergency<br>unblinding | <a href="#">#17b</a> | If blinded, circumstances under which unblinding is permissible, and procedure for revealing a participant's allocated intervention during the trial                                                                                                                                                                                                     | <b>NA- researcher will be blinded to treatment arm for analysis only, however researchers will not be blinded during intervention</b> |
| 53 |                                                   |                      |                                                                                                                                                                                                                                                                                                                                                          |                                                                                                                                       |
| 54 |                                                   |                      |                                                                                                                                                                                                                                                                                                                                                          |                                                                                                                                       |
| 55 |                                                   |                      |                                                                                                                                                                                                                                                                                                                                                          |                                                                                                                                       |
| 56 |                                                   |                      |                                                                                                                                                                                                                                                                                                                                                          |                                                                                                                                       |
| 57 |                                                   |                      |                                                                                                                                                                                                                                                                                                                                                          |                                                                                                                                       |
| 58 |                                                   |                      |                                                                                                                                                                                                                                                                                                                                                          |                                                                                                                                       |
| 59 |                                                   |                      |                                                                                                                                                                                                                                                                                                                                                          |                                                                                                                                       |
| 60 |                                                   |                      |                                                                                                                                                                                                                                                                                                                                                          |                                                                                                                                       |

**because of nature of intervention.**

|    |                      |                      |                                               |
|----|----------------------|----------------------|-----------------------------------------------|
| 1  |                      |                      |                                               |
| 2  |                      |                      |                                               |
| 3  |                      |                      |                                               |
| 4  | Data collection      | <a href="#">#18a</a> | Plans for assessment and collection of        |
| 5  | plan                 |                      | outcome, baseline, and other trial data,      |
| 6  |                      |                      | including any related processes to            |
| 7  |                      |                      | promote data quality (eg, duplicate           |
| 8  |                      |                      | measurements, training of assessors)          |
| 9  |                      |                      | and a description of study instruments        |
| 10 |                      |                      | (eg, questionnaires, laboratory tests)        |
| 11 |                      |                      | along with their reliability and validity, if |
| 12 |                      |                      | known. Reference to where data                |
| 13 |                      |                      | collection forms can be found, if not in the  |
| 14 |                      |                      | protocol                                      |
| 15 |                      |                      |                                               |
| 16 |                      |                      |                                               |
| 17 |                      |                      |                                               |
| 18 |                      |                      |                                               |
| 19 |                      |                      |                                               |
| 20 |                      |                      |                                               |
| 21 | Data collection      | <a href="#">#18b</a> | Plans to promote participant retention        |
| 22 | plan: retention      |                      | and complete follow-up, including list of     |
| 23 |                      |                      | any outcome data to be collected for          |
| 24 |                      |                      | participants who discontinue or deviate       |
| 25 |                      |                      | from intervention protocols                   |
| 26 |                      |                      |                                               |
| 27 |                      |                      |                                               |
| 28 |                      |                      |                                               |
| 29 | Data management      | <a href="#">#19</a>  | Plans for data entry, coding, security, and   |
| 30 |                      |                      | storage, including any related processes      |
| 31 |                      |                      | to promote data quality (eg, double data      |
| 32 |                      |                      | entry; range checks for data values).         |
| 33 |                      |                      | Reference to where details of data            |
| 34 |                      |                      | management procedures can be found, if        |
| 35 |                      |                      | not in the protocol                           |
| 36 |                      |                      |                                               |
| 37 |                      |                      |                                               |
| 38 |                      |                      |                                               |
| 39 |                      |                      |                                               |
| 40 |                      |                      |                                               |
| 41 | Statistics:          | <a href="#">#20a</a> | Statistical methods for analysing primary     |
| 42 | outcomes             |                      | and secondary outcomes. Reference             |
| 43 |                      |                      | to where other details of the statistical     |
| 44 |                      |                      | analysis plan can be found, if not in the     |
| 45 |                      |                      | protocol                                      |
| 46 |                      |                      |                                               |
| 47 |                      |                      |                                               |
| 48 |                      |                      |                                               |
| 49 | Statistics:          | <a href="#">#20b</a> | Methods for any additional analyses (eg,      |
| 50 | additional           |                      | subgroup and adjusted analyses)               |
| 51 | analyses             |                      |                                               |
| 52 |                      |                      |                                               |
| 53 |                      |                      |                                               |
| 54 | Statistics: analysis | <a href="#">#20c</a> | Definition of analysis population relating    |
| 55 | population and       |                      | to protocol non-adherence (eg, as             |
| 56 | missing data         |                      | randomised analysis), and any statistical     |
| 57 |                      |                      |                                               |
| 58 |                      |                      |                                               |
| 59 |                      |                      |                                               |
| 60 |                      |                      |                                               |

**12,13,14, Table 2, Figure 2, Figure 3, Figure 4**

**15**

**15**

**16**

**16**

**NA- not relevant to study design.**

methods to handle missing data (eg, multiple imputation)

|    |                   |                      |                                              |
|----|-------------------|----------------------|----------------------------------------------|
| 1  |                   |                      |                                              |
| 2  |                   |                      |                                              |
| 3  |                   |                      |                                              |
| 4  | Data monitoring:  | <a href="#">#21a</a> | Composition of data monitoring               |
| 5  | formal committee  |                      | committee (DMC); summary of its role         |
| 6  |                   |                      | and reporting structure; statement of        |
| 7  |                   |                      | whether it is independent from the           |
| 8  |                   |                      | sponsor and competing interests; and         |
| 9  |                   |                      | reference to where further details about     |
| 10 |                   |                      | its charter can be found, if not in the      |
| 11 |                   |                      | protocol. Alternatively, an explanation of   |
| 12 |                   |                      | why a DMC is not needed                      |
| 13 |                   |                      |                                              |
| 14 |                   |                      |                                              |
| 15 |                   |                      |                                              |
| 16 |                   |                      |                                              |
| 17 |                   |                      |                                              |
| 18 | Data monitoring:  | <a href="#">#21b</a> | Description of any interim analyses and      |
| 19 | interim analysis  |                      | stopping guidelines, including who will      |
| 20 |                   |                      | have access to these interim results and     |
| 21 |                   |                      | make the final decision to terminate the     |
| 22 |                   |                      | trial                                        |
| 23 |                   |                      |                                              |
| 24 |                   |                      |                                              |
| 25 |                   |                      |                                              |
| 26 | Harms             | <a href="#">#22</a>  | Plans for collecting, assessing, reporting,  |
| 27 |                   |                      | and managing solicited and                   |
| 28 |                   |                      | spontaneously reported adverse events        |
| 29 |                   |                      | and other unintended effects of trial        |
| 30 |                   |                      | interventions or trial conduct               |
| 31 |                   |                      |                                              |
| 32 |                   |                      |                                              |
| 33 |                   |                      |                                              |
| 34 |                   |                      |                                              |
| 35 | Auditing          | <a href="#">#23</a>  | Frequency and procedures for auditing        |
| 36 |                   |                      | trial conduct, if any, and whether the       |
| 37 |                   |                      | process will be independent from             |
| 38 |                   |                      | investigators and the sponsor                |
| 39 |                   |                      |                                              |
| 40 |                   |                      |                                              |
| 41 |                   |                      |                                              |
| 42 | Research ethics   | <a href="#">#24</a>  | Plans for seeking research ethics            |
| 43 | approval          |                      | committee / institutional review board       |
| 44 |                   |                      | (REC / IRB) approval                         |
| 45 |                   |                      |                                              |
| 46 |                   |                      |                                              |
| 47 | Protocol          | <a href="#">#25</a>  | Plans for communicating important            |
| 48 | amendments        |                      | protocol modifications (eg, changes to       |
| 49 |                   |                      | eligibility criteria, outcomes, analyses) to |
| 50 |                   |                      | relevant parties (eg, investigators, REC /   |
| 51 |                   |                      | IRBs, trial participants, trial registries,  |
| 52 |                   |                      | journals, regulators)                        |
| 53 |                   |                      |                                              |
| 54 |                   |                      |                                              |
| 55 |                   |                      |                                              |
| 56 |                   |                      |                                              |
| 57 | Consent or assent | <a href="#">#26a</a> | Who will obtain informed consent or          |
| 58 |                   |                      | assent from potential trial participants or  |
| 59 |                   |                      |                                              |
| 60 |                   |                      |                                              |



|    |                       |                      |                                                                                                                                            |                               |
|----|-----------------------|----------------------|--------------------------------------------------------------------------------------------------------------------------------------------|-------------------------------|
| 1  |                       |                      | authorised surrogates, and how (see Item                                                                                                   |                               |
| 2  |                       |                      | 32)                                                                                                                                        |                               |
| 3  |                       |                      |                                                                                                                                            |                               |
| 4  | Consent or            | <a href="#">#26b</a> | Additional consent provisions for                                                                                                          | <b>NA</b>                     |
| 5  | assent: ancillary     |                      | collection and use of participant data and                                                                                                 |                               |
| 6  | studies               |                      | biological specimens in ancillary studies,                                                                                                 |                               |
| 7  |                       |                      | if applicable                                                                                                                              |                               |
| 8  |                       |                      |                                                                                                                                            |                               |
| 9  |                       |                      |                                                                                                                                            |                               |
| 10 |                       |                      |                                                                                                                                            |                               |
| 11 | Confidentiality       | <a href="#">#27</a>  | How personal information about potential                                                                                                   | <b>16</b>                     |
| 12 |                       |                      | and enrolled participants will be collected,                                                                                               |                               |
| 13 |                       |                      | shared, and maintained in order to                                                                                                         |                               |
| 14 |                       |                      | protect confidentiality before, during, and                                                                                                |                               |
| 15 |                       |                      | after the trial                                                                                                                            |                               |
| 16 |                       |                      |                                                                                                                                            |                               |
| 17 |                       |                      |                                                                                                                                            |                               |
| 18 |                       |                      |                                                                                                                                            |                               |
| 19 | Declaration of        | <a href="#">#28</a>  | Financial and other competing interests                                                                                                    | <b>1</b>                      |
| 20 | interests             |                      | for principal investigators for the overall                                                                                                |                               |
| 21 |                       |                      | trial and each study site                                                                                                                  |                               |
| 22 |                       |                      |                                                                                                                                            |                               |
| 23 |                       |                      |                                                                                                                                            |                               |
| 24 | Data access           | <a href="#">#29</a>  | Statement of who will have access to the                                                                                                   | <b>16/17</b>                  |
| 25 |                       |                      | final trial dataset, and disclosure of                                                                                                     |                               |
| 26 |                       |                      | contractual agreements that limit such                                                                                                     |                               |
| 27 |                       |                      | access for investigators                                                                                                                   |                               |
| 28 |                       |                      |                                                                                                                                            |                               |
| 29 |                       |                      |                                                                                                                                            |                               |
| 30 |                       |                      |                                                                                                                                            |                               |
| 31 | Ancillary and post    | <a href="#">#30</a>  | Provisions, if any, for ancillary and post-                                                                                                | <b>NA</b>                     |
| 32 | trial care            |                      | trial care, and for compensation to those                                                                                                  |                               |
| 33 |                       |                      | who suffer harm from trial participation                                                                                                   |                               |
| 34 |                       |                      |                                                                                                                                            |                               |
| 35 |                       |                      |                                                                                                                                            |                               |
| 36 | Dissemination         | <a href="#">#31a</a> | Plans for investigators and sponsor to                                                                                                     | <b>16/17</b>                  |
| 37 | policy: trial results |                      | communicate trial results to participants,                                                                                                 |                               |
| 38 |                       |                      | healthcare professionals, the public, and                                                                                                  |                               |
| 39 |                       |                      | other relevant groups (eg, via publication,                                                                                                |                               |
| 40 |                       |                      | reporting in results databases, or other                                                                                                   |                               |
| 41 |                       |                      | data sharing arrangements), including                                                                                                      |                               |
| 42 |                       |                      | any publication restrictions                                                                                                               |                               |
| 43 |                       |                      |                                                                                                                                            |                               |
| 44 |                       |                      |                                                                                                                                            |                               |
| 45 |                       |                      |                                                                                                                                            |                               |
| 46 |                       |                      |                                                                                                                                            |                               |
| 47 |                       |                      |                                                                                                                                            |                               |
| 48 | Dissemination         | <a href="#">#31b</a> | Authorship eligibility guidelines and any                                                                                                  | <b>18</b>                     |
| 49 | policy: authorship    |                      | intended use of professional writers                                                                                                       |                               |
| 50 |                       |                      |                                                                                                                                            |                               |
| 51 |                       |                      |                                                                                                                                            |                               |
| 52 | Dissemination         | <a href="#">#31c</a> | Plans, if any, for granting public access to                                                                                               | <b>17</b>                     |
| 53 | policy:               |                      | the full protocol, participant-level dataset,                                                                                              |                               |
| 54 | reproducible          |                      | and statistical code                                                                                                                       |                               |
| 55 | research              |                      |                                                                                                                                            |                               |
| 56 |                       |                      |                                                                                                                                            |                               |
| 57 |                       |                      |                                                                                                                                            |                               |
| 58 | Informed consent      | <a href="#">#32</a>  | Model consent form and other related                                                                                                       | <b>Supplementary material</b> |
| 59 |                       |                      |                                                                                                                                            |                               |
| 60 |                       |                      | For peer review only - <a href="http://bmjopen.bmj.com/site/about/guidelines.xhtml">http://bmjopen.bmj.com/site/about/guidelines.xhtml</a> |                               |

|    |            |                                                                   |
|----|------------|-------------------------------------------------------------------|
| 1  | materials  | documentation given to participants and                           |
| 2  |            | authorised surrogates                                             |
| 3  |            |                                                                   |
| 4  | Biological | <u>#33</u> Plans for collection, laboratory evaluation, <b>NA</b> |
| 5  | specimens  | and storage of biological specimens for                           |
| 6  |            | genetic or molecular analysis in the                              |
| 7  |            | current trial and for future use in ancillary                     |
| 8  |            | studies, if applicable                                            |
| 9  |            |                                                                   |
| 10 |            |                                                                   |
| 11 |            |                                                                   |

12 The SPIRIT checklist is distributed under the terms of the Creative Commons Attribution License CC-  
13 BY-ND 3.0. This checklist can be completed online using <https://www.goodreports.org/>, a tool made  
14 by the [EQUATOR Network](#) in collaboration with [Penelope.ai](#)  
15  
16  
17  
18  
19  
20  
21  
22  
23  
24  
25  
26  
27  
28  
29  
30  
31  
32  
33  
34  
35  
36  
37  
38  
39  
40  
41  
42  
43  
44  
45  
46  
47  
48  
49  
50  
51  
52  
53  
54  
55  
56  
57  
58  
59  
60

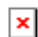

**EVALUATING A CUSTOM DESIGNED AID TO IMPROVE  
COMMUNICATION OF GENETIC RESULTS IN FAMILIES WITH  
HYPERTROPHIC CARDIOMYOPATHY: STUDY PROTOCOL FOR  
A RANDOMISED CONTROLLED TRIAL**

|                                 |                                                                                                                                                                                                                                                             |
|---------------------------------|-------------------------------------------------------------------------------------------------------------------------------------------------------------------------------------------------------------------------------------------------------------|
| Journal:                        | <i>BMJ Open</i>                                                                                                                                                                                                                                             |
| Manuscript ID                   | bmjopen-2018-026627.R1                                                                                                                                                                                                                                      |
| Article Type:                   | Protocol                                                                                                                                                                                                                                                    |
| Date Submitted by the Author:   | 23-Nov-2018                                                                                                                                                                                                                                                 |
| Complete List of Authors:       | Burns, Charlotte; Centenary Institute, Molecular Cardiology Program<br>Yeates, Laura; Centenary Institute, Molecular Cardiology Program<br>Semsarian, Christopher; Centenary Institute,<br>Ingles, Jodie; Centenary Institute, Molecular Cardiology Program |
| <b>Primary Subject Heading</b>: | Genetics and genomics                                                                                                                                                                                                                                       |
| Secondary Subject Heading:      | Cardiovascular medicine, Communication                                                                                                                                                                                                                      |
| Keywords:                       | Protocols & guidelines < HEALTH SERVICES ADMINISTRATION & MANAGEMENT, Cardiomyopathy < CARDIOLOGY, Genetics < TROPICAL MEDICINE                                                                                                                             |
|                                 |                                                                                                                                                                                                                                                             |

SCHOLARONE™  
Manuscripts

1  
2  
3  
4  
5  
6  
7  
8  
9  
10  
11  
12  
13  
14  
15  
16  
17  
18  
19  
20  
21  
22  
23  
24  
25  
26  
27  
28  
29  
30  
31  
32  
33  
34  
35  
36  
37  
38  
39  
40  
41  
42  
43  
44  
45  
46  
47  
48  
49  
50  
51  
52  
53  
54  
55  
56  
57  
58  
59  
60

# EVALUATING A CUSTOM DESIGNED AID TO IMPROVE COMMUNICATION OF GENETIC RESULTS IN FAMILIES WITH HYPERTROPHIC CARDIOMYOPATHY: STUDY PROTOCOL FOR A RANDOMISED CONTROLLED TRIAL

Charlotte Burns, MGC MPH,\*†‡ Laura Yeates, GradDipGenCouns,\*‡ Christopher  
Semsarian, MBBS MPH PhD,\*†‡ Jodie Ingles, GradDipGenCouns MPH PhD\*†‡

\*Agnes Ginges Centre for Molecular Cardiology, Centenary Institute, Sydney, Australia;  
†Sydney Medical School, Faculty of Medicine and Health, University of Sydney;  
‡Department of Cardiology, Royal Prince Alfred Hospital, Sydney, Australia.

*Total word count: 3097 (not including abstract or references)*

*Key words: Protocol, randomised controlled trial, hypertrophic cardiomyopathy, genetic testing.*

## **NO DISCLOSURES**

### **Address for Correspondence:**

Doctor Jodie Ingles

Agnes Ginges Centre for Molecular Cardiology

Centenary Institute

Locked Bag 6

Newtown NSW 2042 Australia

Email: [j.ingles@centenary.org.au](mailto:j.ingles@centenary.org.au)

## ABSTRACT

**Introduction:** Genetic testing for hypertrophic cardiomyopathy (HCM) in the era of genomics brings unique challenges for genetic counselling. The number of genes routinely included in an HCM gene panel has increased markedly, many with minimal if any robust evidence of gene-disease association. Subsequently there is a greater chance of uncertain genetic findings. The responsibility of communicating this information with at-risk relatives lies with the index case (proband). We have developed a communication aid to assist with the delivery of genetic results to the proband. We have previously shown the aid is feasible and acceptable, and have now developed a study protocol for a randomised controlled trial of a genetic counsellor-led intervention incorporating the communication aid.

**Methods and Analysis:** This is a prospective randomised controlled trial. We will investigate the impact of a genetic counsellor-led intervention to return proband gene results using a custom designed communication aid. We aim to improve knowledge and empowerment. The primary outcome of this trial is the ability and confidence of the proband to communicate genetic results to at-risk relatives. Secondary outcomes will assess genetic knowledge, satisfaction with services, outcomes from genetic counselling and psychological adaptation to genetic information.

**Ethics and Dissemination:** This study has been approved by and is in strict accordance with the Sydney Local Health District Ethics Review Committee (X16-0030; 22/01/2016; version 1). Results from this trial will be prepared as a manuscript and submitted to peer-reviewed journals for publication as well as submission for presentation at national and international meetings.

**Registration Details:** This trial is registered with the Australian New Zealand Clinical Trials Registry: ACTRN12617000706370

## STRENGTHS AND LIMITATIONS

- This study will assess the effectiveness of a communication aid to improve the ability and confidence of patients with hypertrophic cardiomyopathy (HCM) to communicate genetic test results with their at-risk relatives.
- The results of this trial will inform genetic counselling practice for HCM genetic testing, as well as be broadly applicable for other inherited heart diseases.
- Limitations include the generalisability of our findings, which are true for a specialised multidisciplinary clinic where the intervention was performed but may not be representative of the broader HCM population undergoing genetic testing.
- As genomic technologies continue to evolve, uncertainty and complexity of genetic findings will likely increase over time.

## INTRODUCTION

### Background and rationale

Genetic testing in the era of genomics brings unique challenges for the genetic counselling of families. Hypertrophic cardiomyopathy (HCM) is a clinically heterogeneous inherited heart disease characterised by unexplained left ventricular hypertrophy in the absence of a loading condition such as hypertension.<sup>1</sup> With a prevalence of 1 in 200-500, it is one of the most common inherited heart diseases and clinical manifestations can range from asymptomatic through to heart failure or sudden cardiac death.<sup>2</sup> In the setting of HCM, genetic testing of the index case (proband) can provide invaluable information by allowing at-risk relatives the opportunity to undergo cascade genetic testing to look for the presence or absence of the family-specific variants.<sup>3</sup> The first step is often the most challenging, requiring identification of a variant for which there is sufficient evidence of causation.

Genetic counselling is a critical aspect of the process, not just for genetic testing, but also for understanding inheritance risks, characterisation of the family history and information and emotional support.<sup>4</sup> Within a clinical setting, pre- and post-test genetic counselling should include discussion of inheritance risks and clinical screening guidelines for at-risk relatives.<sup>5</sup> This allows asymptomatic at-risk relatives to make proactive, informed decisions regarding their risk, including family planning decisions.

How a patient understands and communicates this genetic information to their at-risk relatives is critical to ensuring patients' get the most value out of genetic testing. This task of communication relies on the proband within the family. Current Australian practice and privacy laws dictate that in most cases the health care provider does not make contact with relatives to disclose risk information. Therefore, it follows that in order to communicate genetic results or risk information the proband must have adequate understanding of the

1  
2 information they have received from their healthcare provider. Several studies indicate this  
3  
4 may be problematic, and some individuals may not retain or understand the information  
5  
6 presented to them.<sup>6</sup>  
7  
8  
9

## 11 Existing knowledge

12  
13 Currently literature estimates between 20-40% of relatives remain unaware of relevant  
14  
15 genetic information and do not act on information even when they have reportedly been  
16  
17 informed of their risk.<sup>7-9</sup> Many factors have been identified which influence family  
18  
19 communication about genetic risk, including complicated family dynamics, guilt, anxiety  
20  
21 and gender, however are difficult to target as areas for improvement within the context of  
22  
23 one or two genetic counselling sessions.<sup>7 8 10 11</sup> There are stages within the genetic  
24  
25 counselling process, where communication of genetic results and uptake of appropriate  
26  
27 screening may be influenced.  
28  
29  
30

31  
32  
33  
34 Our group and others have shown some of the barriers that can negatively impact on  
35  
36 family communication. In a qualitative study of HCM patients undergoing comprehensive  
37  
38 genetic testing, many patients reported uncertain results to be conveyed less amongst  
39  
40 families.<sup>12</sup> Further, these results are often misunderstood. For example, amongst this  
41  
42 cohort, probands with uncertain results perceived these results as falsely reassuring or  
43  
44 conversely suggests their disease is 'worse' or 'different'. This led to a misunderstanding  
45  
46 that their result was not heritable and therefore communication with relatives did not  
47  
48 occur.<sup>12</sup> Supporting these findings, the general genetics literature highlights that risk  
49  
50 perception and understanding of results though varied, can be poor, inaccurate and  
51  
52 incomplete.<sup>13 14</sup>  
53  
54  
55  
56  
57  
58  
59  
60



1  
2 There is evidence for the effectiveness of a genetic counsellor in addressing some of the  
3 communication and knowledge barriers.<sup>15-17</sup> One key area for intervention is during the  
4 post-test genetic counselling session. Genetic and risk information can be difficult to  
5 understand and explain clearly and as a consequence, the patient may not gain sufficient  
6 knowledge and lack confidence to convey these key messages to at-risk relatives.<sup>12</sup>  
7  
8 Further, it is recognised that patients deliberate on the appropriate time to communicate  
9 genetic information and make decisions regarding which relatives the information is  
10 pertinent to, regardless of the recommendation of professionals.<sup>7 18 19</sup> Few resources exist  
11 which aim to facilitate effective communication to at-risk relatives. We therefore  
12 hypothesise that improving knowledge of an HCM genetic diagnosis will have a positive  
13 impact on communication to at-risk relatives, as well as genetic knowledge, satisfaction  
14 with services, outcomes from genetic counselling and psychological adaptation to genetic  
15 information.

### 34 **Utility of a communication aid**

35  
36 When asked about family communication, most patients report families should  
37 communicate risk amongst themselves with varying levels of support from their healthcare  
38 providers.<sup>14 17 20</sup> In addition, there is evidence for the effectiveness of genetic counselling  
39 to assist with this process.<sup>15 16 20</sup> Hodgson et al. published a randomised controlled trial  
40 assessing the impact of a genetic counselling phone intervention on communication of  
41 genetic information within families.<sup>21</sup> They found no significant difference between the  
42 intervention and control group when measuring contact with genetic services, though in  
43 sub-analyses of the high-risk children group, the primary outcome was significantly  
44 improved. Importantly, the primary outcome measure was contact with a genetic service,  
45 which can be difficult to ascertain and may not be the most accurate measure of  
46 effectiveness or a direct reflection of communication efforts.

1  
2 Resources such as decision and communication aids, or family letters, may provide  
3  
4 additional support to this process, though more data is needed regarding efficacy.<sup>15 19 21 22</sup>  
5  
6 Decision or communication aids are tools specifically designed to support patients with  
7  
8 decision making and unmet information needs. There is evidence for the effectiveness of  
9  
10 an aid with regard to improved knowledge and accuracy of risk perceptions.<sup>23-25</sup> Further,  
11  
12 most health information is written which may not be the most effective health  
13  
14 communication method. Communication and decision aids provide a format to include  
15  
16 visual elements that may improve comprehension, recall and comfort with the information,  
17  
18 particularly when health literacy may be an issue.  
19  
20  
21  
22  
23  
24

### 25 **Need for a trial**

26  
27 Overall, the literature highlights that probands require additional support to understand and  
28  
29 communicate genetic results. The rationale for this study is the critical gap in supporting  
30  
31 patients' comprehension and consequent communication of genetic risk to at-risk relatives.  
32  
33 Though genetic counsellors are specifically trained in delivering genetic information,  
34  
35 information needs of patients are not always met and communication amongst at-risk  
36  
37 relatives can be suboptimal. As genetic test results become increasingly complex, an  
38  
39 evidence-based approach to supporting patients with genetic knowledge and risk  
40  
41 communication should be explored.  
42  
43  
44  
45  
46  
47

### 48 **STUDY AIMS AND OUTCOMES**

49  
50 The aim of this randomised controlled trial is to determine if a genetic counsellor-led  
51  
52 intervention using a communication aid for the delivery of HCM genetic test results  
53  
54 improves the ability and confidence of the proband to communicate genetic results to at-  
55  
56 risk relatives compared with current clinical practice.  
57  
58  
59  
60

- 1  
2  
3  
4  
5  
6  
7  
8  
9  
10  
11  
12  
13  
14  
15  
16  
17  
18  
19  
20  
21  
22  
23  
24  
25  
26  
27  
28  
29  
30  
31  
32  
33  
34  
35  
36  
37  
38  
39  
40  
41  
42  
43  
44  
45  
46  
47  
48  
49  
50  
51  
52  
53  
54  
55  
56  
57  
58  
59  
60  
1. The primary outcome is the ability and confidence of the proband to communicate genetic results to at-risk relatives, measured at 2 weeks post-intervention.
2. Secondary outcomes will assess genetic knowledge, satisfaction with services, patient reported outcome of genetic counselling and psychological adaptation to genetic information, measured at 2 weeks post-intervention.
3. As a longer-term outcome, we will systematically assess and document family communication as reported by the proband measured by phone calls at one, three and six monthly intervals. The researcher conducting these phone calls will not be blinded to the treatment arm of the participant. During these phone calls a series of questions regarding family communication and uptake of family screening will be asked of the proband. These phone calls will be conducted and analysed after collection of the primary and secondary outcomes data. This is to prevent interference with results because the phone calls themselves may serve as a family communication intervention. A phone script to be used as a guide for these phone calls is available in the supplementary material.

## **METHODS AND ANALYSIS**

### **Trial design**

This is a prospective randomised controlled trial. The protocol is reported in accordance with the SPIRIT statement, which provides recommendations for a minimum set of scientific, ethical and administrative elements that should be addressed within a clinical trial protocol.<sup>26</sup> All items from the World Health Organization Trial Registration Data Set are listed in Table 1. Consecutive HCM patients will be invited to participate when they are notified on the phone that their genetic result is ready to be returned. Once written consent is obtained they will be randomised to receive their genetic result via the intervention or control arm of the study (Figure 1).

### **Study setting**

This trial will be carried out within a specialised multidisciplinary HCM clinic. This incorporates the expertise of specialist cardiologists and cardiac genetic counsellors.<sup>27</sup> Patients with HCM attending these clinics at Royal Prince Alfred Hospital will be invited to attend.

### **Eligibility criteria**

HCM probands with a genetic result ready for return are eligible. HCM probands are defined as the first person in the family to undergo genetic testing for HCM. Probands include those with and without a family history of disease provided genetic testing has been ordered. Participants must be aged 16 years or older, with sufficient written English skills as nominated by the participant. Genetic testing is performed as part of a research study, or commercial laboratory as previously published.<sup>28 29</sup> All identified variants are classified in the same manner, as per current clinical standards and guidelines.<sup>30</sup> Recruitment commenced in November 2017 and is expected to end in November 2018.

1  
2 Participants will be invited to participate in the study during their routine pre clinic phone  
3  
4 call conducted as normal clinical process. Informed consent will be obtained by the cardiac  
5  
6 genetic counsellor present at the participants clinic consultation (supplementary material).  
7  
8  
9

## 10 11 **Randomisation**

12  
13 A randomised list was prepared using the Excel (Microsoft Office) "Random" function and  
14  
15 study participants who consent to the study are allocated the next number on the random  
16  
17 list. This number is linked to either control or intervention. A researcher not involved in the  
18  
19 study performs the randomisation.  
20  
21  
22  
23

## 24 25 **Sample size and power calculations**

26  
27 Prior to commencement of the study, power calculations were performed using the results  
28  
29 from our published feasibility study.<sup>31</sup> The primary outcome of this trial is the ability and  
30  
31 confidence of the proband to communicate genetic results to at-risk relatives. Data from  
32  
33 the feasibility study indicated 75% of participants communicated genetic results to at-risk  
34  
35 relatives. Assuming the control group communicates in 50% of cases, at a significance  
36  
37 level of 5% and 80% statistical power, a sample size of n=21 is required per group.  
38  
39  
40  
41  
42

## 43 44 **Development of the custom communication aid**

45  
46 We have developed a communication aid to assist with the delivery of genetic results to  
47  
48 the proband and support family communication. A pilot study demonstrating feasibility and  
49  
50 acceptability of this aid has been previously reported.<sup>31</sup> In brief, development of the aid  
51  
52 involved review of the literature alongside multidisciplinary meetings. Development was a  
53  
54 multistep process and on the basis of meeting outcomes, literature review and empirical  
55  
56 evidence from the multidisciplinary team. The aid addresses:  
57  
58

- 59 1. Genetic test basic background information
- 60

- 1
  - 2
  - 3
  - 4
  - 5
  - 6
  - 7
  - 8
  - 9
  - 10
  - 11
  - 12
  - 13
  - 14
  - 15
  - 16
  - 17
  - 18
  - 19
  - 20
  - 21
  - 22
  - 23
  - 24
  - 25
  - 26
  - 27
  - 28
  - 29
  - 30
  - 31
  - 32
  - 33
  - 34
  - 35
  - 36
  - 37
  - 38
  - 39
  - 40
  - 41
  - 42
  - 43
  - 44
  - 45
  - 46
  - 47
  - 48
  - 49
  - 50
  - 51
  - 52
  - 53
  - 54
  - 55
  - 56
  - 57
  - 58
  - 59
  - 60
2. Possible outcomes of genetic testing
  3. Overview of the process involved in classification of a genetic variant
  4. Implications for at-risk relatives including family screening recommendations

### **Control arm**

Those within the control arm of the study will receive their result via normal clinical practice. There are currently no evidence-based guidelines for return of comprehensive genetic test results within the multidisciplinary clinic setting. Normal clinical practice typically involves return of a genetic result either by the cardiologist or genetic counsellor. Return of the result is usually performed following clinical cardiology review, which is often the primary purpose of the consult. In the majority of cases a genetic counsellor is present.

### **Intervention arm**

Those randomised to the intervention arm will be allocated a separate appointment time after clinical review with their cardiologist, where they will see the cardiac genetic counsellor who will return their genetic result using the communication aid.

The communication aid covers the process of genetic testing and risk from diagnosis of HCM through to the implications of a genetic result for at-risk relatives (Figure 2). There is a section in the aid under 'Results', which goes through the meaning of each category of genetic result. These include an indeterminate result (no variant identified), a variant of uncertain significance and a likely pathogenic/pathogenic result (Figure 3). The genetic counsellor returning the genetic result will mark the appropriate category of result, which applies to the patient in front of them. The genetic counsellor will return the genetic result, and then go through the communication aid, referencing the individual result and specific recommendations for the rest of the family. There will be an opportunity to ask questions,

1  
2 and the genetic counsellor will write the specific recommendations for each family member  
3  
4 in the box provided at the end of the communication aid (Figure 4).  
5  
6  
7

## 8 **Patient and Public Involvement**

9  
10  
11 Development of this research question and outcome measures were informed by clinical  
12  
13 experience of the authors in a specialised clinic setting, as well as published research  
14  
15 identifying gaps in communication with relatives. Specifically, there are known challenges  
16  
17 associated with understanding and subsequent communication of genetic information to  
18  
19 relatives. We have shown poor understanding, recall, and communication of genetic  
20  
21 results amongst HCM probands.<sup>7 12</sup> Prior to implementation and development of this trial, a  
22  
23 pilot study involving patients was conducted, incorporating patient preference and needs  
24  
25 allowing development of both the communication aid and the study protocol.<sup>31</sup> Results will  
26  
27 be disseminated to patients in the form of a research participant newsletter on completion  
28  
29 of the study. In addition, those randomised to the control arm will receive a copy of the  
30  
31 communication aid. Patients provided written consent to participate in the study, with an  
32  
33 understanding of the requirements of the study. These were not considered by the patients  
34  
35 or study team to be burdensome for the patients participating in the study.  
36  
37  
38  
39  
40  
41  
42

## 43 **DATA COLLECTION AND OUTCOMES**

44  
45 Both the primary and secondary outcomes will be measured at a single time point (2-  
46  
47 weeks post intervention) using a survey comprised of a number of previously published  
48  
49 and validated scales. A number of demographic questions will also be asked within the  
50  
51 survey. The survey will be available online via qualtrics (<https://www.qualtrics.com/>) with a  
52  
53 direct link sent to participants. For those who prefer a hard copy it will be posted with a  
54  
55 return envelope. The survey will be sent two weeks after return of genetic results.  
56  
57  
58  
59 Evidence regarding the most appropriate time between genetic result disclosure and family  
60

1  
2 communication is lacking. However, given the risk of arrhythmia and sudden death within  
3  
4 the inherited heart disease context, two weeks post result disclosure was considered by  
5  
6 the study team to be an appropriate time point to send the survey.<sup>25</sup> Return of the survey  
7  
8 is followed up on a fortnightly basis.  
9

### 10 11 12 13 **Primary outcome** 14

15  
16 The primary outcome of this trial is the ability and confidence of the proband to  
17  
18 communicate genetic results to at-risk relatives. This will be measured at a single time  
19  
20 point, administered two weeks after return of genetic results. Ability and confidence will be  
21  
22 assessed by two measures and then combined into a binary outcome. The certainty sub-  
23  
24 scale of the Psychological Adaptation to Genetic Information (PAGIS) scale will measure  
25  
26 confidence with genetic knowledge.<sup>32</sup> This sub-scale measures the patients' perception  
27  
28 and confidence in their genetic knowledge and the items from this sub-scale are listed in  
29  
30 Table 2. Subsequent ability to pass this information on will be measured by the number of  
31  
32 at-risk relatives informed of genetic results by the proband. We will average the scores  
33  
34 from both measures to determine a final score. The calculations used to determine this  
35  
36 cut-off are illustrated in Table 3.  
37  
38  
39  
40  
41  
42

43  
44 In summary, we will calculate the total PAGIS certainty sub-scale score (denominator of  
45  
46 36). This will be added to the total number of relatives informed over the total number of  
47  
48 relatives at risk. This number will then be converted to a percentage. The final score will be  
49  
50 converted to a binary outcome of fair versus poor ability and confidence to communicate  
51  
52 genetic results to at-risk relatives. A cut-off of  $\geq 75\%$  will be used to indicate fair  
53  
54 communication, based on data indicating 20-40% of relatives are not informed of their  
55  
56 genetic risk. This outcome has been specifically designed for this study.  
57  
58  
59  
60



1  
2 Factors that influence communication of genetic results to at-risk relatives are  
3 multidimensional. For this reason, we chose this combination approach to more broadly  
4 reflect the communication process. Many studies rely on single and linear measures of  
5 communication such as contact by relatives with genetics departments or self reported  
6 communication with at-risk relatives only. To overcome this, we aimed to incorporate a  
7 multidimensional approach that included the probands confidence regarding their  
8 knowledge of genetics alongside the action linked to this knowledge, being the  
9 communication to relatives. This will aim to determine consistency between the probands  
10 confidence with genetic information against their self-reported percentage of immediate  
11 family members informed  
12  
13  
14  
15  
16  
17  
18  
19  
20  
21  
22  
23

24  
25  
26  
27 The certainty sub-scale of the Psychological Adaptation to Genetic Information Scale  
28 (PAGIS) will be used to measure confidence with genetic knowledge as described  
29 above.<sup>32</sup> Guided by grounded theory in patient perspectives of genetic counselling and the  
30 Roy Adaptation to Genetic Information Model, the 26-item PAGIS scale allows for  
31 evaluation of the efficacy of genetic counselling.<sup>32 33</sup> The scale aims to incorporate the  
32 multidimensional adaptation to genetic information and comprises of five domains which  
33 include; a) non-intrusiveness, b) support c) self-worth, d) certainty and e) self-efficacy.<sup>32</sup>  
34  
35  
36  
37  
38  
39  
40  
41  
42  
43  
44  
45  
46  
47  
48  
49  
50  
51  
52  
53  
54  
55  
56  
57  
58  
59  
60

Evidence for the utility of this scale has been published and illustrates its potential use for  
assessing genetic counselling interventions.<sup>32</sup>

### **Secondary outcomes**

The survey comprises three additional scales to assess primary and secondary outcomes, a number of questions regarding communication with relatives, as well as a number of demographic questions.

1  
2 Genetic knowledge will be assessed using an amended version of the Breast Cancer  
3  
4 Genetic Counseling Knowledge Questionnaire (BGKQ).<sup>33 34</sup> This scale was originally  
5  
6 developed to assess knowledge of information typically included in genetic counselling for  
7  
8 breast cancer. The original scale was a 27 item questionnaire including statements  
9  
10 regarding genetics such as '*50% (half) of your genetic information was passed down from*  
11  
12 *your mother*' and participants were asked if the statement was true or false. Items in the  
13  
14 original scale were empirically derived from detailed content analysis of breast cancer  
15  
16 genetic counselling sessions. The original scale demonstrated a high content validity with  
17  
18 cronbachs  $\alpha = 0.92$ , with demonstrated ability to discriminate between patients before and  
19  
20 after genetic counselling sessions.<sup>34</sup> We have amended questions to reflect the HCM  
21  
22 context and 10 items were included.  
23  
24  
25  
26  
27  
28

29 Satisfaction with services received will be assessed using the widely used Satisfaction with  
30  
31 Genetic Counseling Scale (SGCS).<sup>35</sup> The original questionnaire was designed to assess  
32  
33 three dimensions of patient satisfaction: instrumental, affective and procedural.<sup>33 35</sup> This  
34  
35 survey will use an amended version of the 12 item short form of the survey.  
36  
37  
38  
39  
40

41 The genetic counselling outcome scale (GCOS-24) will be used to assess patient reported  
42  
43 outcomes of genetic counselling.<sup>36</sup> The questionnaire was designed to be used pre and  
44  
45 post genetic counselling, though we have used it in the post counselling setting. The  
46  
47 authors of this scale used the construct of empowerment to summarise the patient derived  
48  
49 benefits from genetic counselling.  
50  
51  
52  
53  
54

## 55 **Data management**

56  
57 All data from the survey will be entered into Microsoft Excel. Patient identifiers will be  
58  
59 removed with study codes allocated. The primary researcher will be blinded to treatment  
60

1  
2 arm of the patient for analysis of the primary and secondary outcome data. A second  
3  
4 senior researcher and supervisor will oversee data storage and analysis. Data will be  
5  
6 stored in accordance with the Sydney Local Health District Ethics Review Committee and  
7  
8 Centenary Institute.  
9

### 10 11 12 13 **Data analysis plan** 14

15  
16 Data will be analysed using Prism (version 7.0) and SPSS (Version 23.0). We will compare  
17  
18 the primary outcome as a binary measure between the intervention and control group. We  
19  
20 will use chi-square analyses using  $p < 0.05$  for statistical significance. For assessment of  
21  
22 secondary outcomes we will be guided by published scoring systems for the validated  
23  
24 scales to score genetics knowledge, satisfaction with services and genetic counselling  
25  
26 outcomes. Mean scores for each scale will be compared between the intervention and  
27  
28 control group and comparisons between the control and intervention group will be  
29  
30 analysed using unpaired t-tests for continuous data and chi-square analysis for categorical  
31  
32 data. Sub-group analysis will also be performed; specifically we will compare outcomes in  
33  
34 the study groups stratified by the gene result (i.e. causative, uncertain or indeterminate  
35  
36 results) and compare familial and non-familial HCM probands, which has been previously  
37  
38 shown to influence family communication practices.<sup>37</sup>  
39  
40  
41  
42  
43  
44

45  
46 As a longer-term outcome, we will systematically assess and document family  
47  
48 communication as reported by the proband measured by phone calls at one, three and six  
49  
50 monthly intervals. These phone calls will also measure uptake of family screening as  
51  
52 reported by the proband. This will be assessed separately to the primary and secondary  
53  
54 outcomes. We will compare outcomes between the study groups stratified by the gene  
55  
56 result (i.e. causative, uncertain or indeterminate results). In addition, we will compare  
57  
58  
59  
60

1  
2 outcomes between study groups stratified by those with and without a family history of  
3  
4 HCM.  
5  
6  
7

## 8 **ETHICS AND DISSEMINATION**

### 10 **Ethics**

11  
12 All aspects of the study will be performed according to institutional human research ethics  
13  
14 committee approval. This study has been approved by and is in strict accordance with the  
15  
16 Sydney Local Health District Ethics Review Committee (X16-0030).  
17  
18  
19  
20  
21

### 22 **Dissemination**

23  
24 Results from this trial will be prepared as a manuscript and submitted to peer-reviewed  
25  
26 journals for publication. In addition, it will form part of the first authors' PhD thesis. Results  
27  
28 from the study will be submitted to international and national scientific sessions with the  
29  
30 aim of being presented. We will make a copy of the aid available to a wider genetic  
31  
32 audience for use in their clinical practice and study data will be available from the authors.  
33  
34  
35 This will include development of an electronic form of the aid.  
36  
37  
38  
39  
40  
41  
42  
43  
44  
45  
46  
47  
48  
49  
50  
51  
52  
53  
54  
55  
56  
57  
58  
59  
60

## ACKNOWLEDGEMENTS AND FUNDING

CB is the recipient of an Australia Postgraduate Award (APA). CS is the recipient of a National Health and Medical Research Council (NHMRC) Practitioner Fellowship (#1059156). JI is the recipient of a National Heart Foundation of Australia Future Leader Fellowship (#100833).

We thank Yana Smagarinsky for her assistance with developing the communication aid and Katharine Morgan for graphic design of the communication aid.

## AUTHOR STATEMENT

All authors contributed to the manuscript, specifically:

- (1) Substantial contributions to the conception or design of the work; or the acquisition, analysis, or interpretation of data for the work (CB, LY, CS, JI); AND
- (2) Drafting the work or revising it critically for important intellectual content (CB, LY, CS, JI); AND
- (3) Final approval of the version to be published (CB, LY, CS, JI); AND
- (4) Agreement to be accountable for all aspects of the work in ensuring that questions related to the accuracy or integrity of any part of the work are appropriately investigated and resolved (CB, LY, CS, JI).

## COMPETING INTERESTS

**All authors declare they have no disclosures regarding competing interests.**

**REFERENCES**

1. Maron BJ, Maron MS, Semsarian C. Genetics of hypertrophic cardiomyopathy after 20 years: clinical perspectives. *Journal of the American College of Cardiology* 2012;60(8):705-15. doi: 10.1016/j.jacc.2012.02.068
2. Semsarian C, Ingles J, Maron MS, et al. New perspectives on the prevalence of hypertrophic cardiomyopathy. *J Am Coll Cardiol* 2015;65(12):1249-54. doi: 10.1016/j.jacc.2015.01.019
3. Ingles J, Burns C, Barratt A, et al. Application of Genetic Testing in Hypertrophic Cardiomyopathy for Preclinical Disease Detection. *Circ Cardiovasc Genet* 2015;8(6):852-9. doi: 10.1161/CIRCGENETICS.115.001093
4. National Society of Genetic Counselors' Definition Task F, Resta R, Biesecker BB, et al. A new definition of Genetic Counseling: National Society of Genetic Counselors' Task Force report. *Journal of genetic counseling* 2006;15(2):77-83. doi: 10.1007/s10897-005-9014-3
5. Semsarian C, Ingles J. A clinical approach to genetic testing for non-specialists. *Bmj* 2017;358:j4101. doi: 10.1136/bmj.j4101
6. Burns C, James C, Ingles J. Communication of genetic information to families with inherited rhythm disorders. *Heart rhythm* 2018;15(5):780-86. doi: 10.1016/j.hrthm.2017.11.024
7. Burns C, McGaughran J, Davis A, et al. Factors influencing uptake of familial long QT syndrome genetic testing. *Am J Med Genet A* 2016;170A(2):418-25. doi: 10.1002/ajmg.a.37455
8. Christiaans I, Birnie E, Bonsel GJ, et al. Uptake of genetic counselling and predictive DNA testing in hypertrophic cardiomyopathy. *Eur J Hum Genet* 2008;16(10):1201-7. doi: ejhg200892 [pii] 10.1038/ejhg.2008.92 [published Online First: 2008/05/15]
9. Gaff CL, Clarke AJ, Atkinson P, et al. Process and outcome in communication of genetic information within families: a systematic review. *European journal of human genetics : EJHG* 2007;15(10):999-1011. doi: 10.1038/sj.ejhg.5201883
10. Claes E, Evers-Kiebooms G, Boogaerts A, et al. Communication with close and distant relatives in the context of genetic testing for hereditary breast and ovarian cancer in cancer patients. *American journal of medical genetics Part A* 2003;116A(1):11-9. doi: 10.1002/ajmg.a.10868
11. Barsevick AM, Montgomery SV, Ruth K, et al. Intention to communicate BRCA1/BRCA2 genetic test results to the family. *Journal of family psychology : JFP : journal of the Division of Family Psychology of the American Psychological Association* 2008;22(2):303-12. doi: 10.1037/0893-3200.22.2.303
12. Burns C, Yeates L, Spinks C, et al. Attitudes, knowledge and consequences of uncertain genetic findings in hypertrophic cardiomyopathy. *Eur J Hum Genet* 2017;25(7):809-15. doi: 10.1038/ejhg.2017.66

- 1  
2 13. Patenaude AF, Tung N, Ryan PD, et al. Young adult daughters of BRCA1/2 positive  
3 mothers: what do they know about hereditary cancer and how much do they worry?  
4 *Psycho-oncology* 2013;22(9):2024-31. doi: 10.1002/pon.3257  
5
- 6 14. Young AL, Butow PN, Vetsch J, et al. Family Communication, Risk Perception and  
7 Cancer Knowledge of Young Adults from BRCA1/2 Families: a Systematic Review.  
8 *Journal of genetic counseling* 2017;26(6):1179-96. doi: 10.1007/s10897-017-0125-4  
9
- 10 15. Forrest LE, Burke J, Bacic S, et al. Increased genetic counseling support improves  
11 communication of genetic information in families. *Genetics in medicine : official journal of*  
12 *the American College of Medical Genetics* 2008;10(3):167-72. doi:  
13 10.1097/GIM.0b013e318164540b  
14  
15
- 16 16. Fiallos K, Applegate C, Mathews DJ, et al. Choices for return of primary and secondary  
17 genomic research results of 790 members of families with Mendelian disease. *European*  
18 *journal of human genetics : EJHG* 2017;25(5):530-37. doi: 10.1038/ejhg.2017.21  
19
- 20 17. Forrest K, Simpson SA, Wilson BJ, et al. To tell or not to tell: barriers and facilitators in  
21 family communication about genetic risk. *Clinical genetics* 2003;64(4):317-26.  
22  
23
- 24 18. Montgomery SV, Barsevick AM, Egleston BL, et al. Preparing individuals to  
25 communicate genetic test results to their relatives: report of a randomized control trial.  
26 *Fam Cancer* 2013;12(3):537-46. doi: 10.1007/s10689-013-9609-z  
27
- 28 19. Seymour KC, Addington-Hall J, Lucassen AM, et al. What Facilitates or Impedes  
29 Family Communication Following Genetic Testing for Cancer Risk? A Systematic Review  
30 and Meta-Synthesis of Primary Qualitative Research. *Journal of genetic counseling*  
31 2010;19(4):330-42. doi: 10.1007/s10897-010-9296-y  
32  
33
- 34 20. Healey E, Taylor N, Greening S, et al. Quantifying family dissemination and identifying  
35 barriers to communication of risk information in Australian BRCA families. *Genetics in*  
36 *medicine : official journal of the American College of Medical Genetics* 2017;19(12):1323-  
37 31. doi: 10.1038/gim.2017.52  
38
- 39 21. Hodgson J, Metcalfe S, Gaff C, et al. Outcomes of a randomised controlled trial of a  
40 complex genetic counselling intervention to improve family communication. *European*  
41 *journal of human genetics : EJHG* 2016;24(3):356-60. doi: 10.1038/ejhg.2015.122  
42  
43
- 44 22. Suthers GK, Armstrong J, McCormack J, et al. Letting the family know: balancing  
45 ethics and effectiveness when notifying relatives about genetic testing for a familial  
46 disorder. *Journal of medical genetics* 2006;43(8):665-70. doi: 10.1136/jmg.2005.039172  
47
- 48 23. Stacey D, Legare F, Lewis K, et al. Decision aids for people facing health treatment or  
49 screening decisions. *Cochrane Db Syst Rev* 2017(4) doi: Artn Cd001431  
50 10.1002/14651858.Cd001431.Pub5  
51  
52
- 53 24. Wakefield CE, Meiser B, Homewood J, et al. Development and pilot testing of two  
54 decision aids for individuals considering genetic testing for cancer risk. *Journal of genetic*  
55 *counseling* 2007;16(3):325-39. doi: 10.1007/s10897-006-9068-x  
56
- 57 25. Vavolizza RD, Kalia I, Aaron KE, et al. Disclosing Genetic Information to Family  
58 Members About Inherited Cardiac Arrhythmias: An Obligation or a Choice? *Journal of*  
59 *genetic counseling* 2015;24(4):608-15. doi: 10.1007/s10897-014-9783-7  
60

- 1  
2 26. Chan AW, Tetzlaff JM, Altman DG, et al. SPIRIT 2013 statement: defining standard  
3 protocol items for clinical trials. *Annals of internal medicine* 2013;158(3):200-7. doi:  
4 10.7326/0003-4819-158-3-201302050-00583  
5
- 6 27. Ingles J, Lind JM, Phongsavan P, et al. Psychosocial impact of specialized cardiac  
7 genetic clinics for hypertrophic cardiomyopathy. *Genet Med* 2008;10(2):117-20. doi:  
8 10.1097/GIM.0b013e3181612cc7  
9 00125817-200802000-00007 [pii] [published Online First: 2008/02/19]  
10
- 11 28. Bagnall RD, Weintraub RG, Ingles J, et al. A Prospective Study of Sudden Cardiac  
12 Death among Children and Young Adults. *New Engl J Med* 2016;374(25):2441-52. doi:  
13 10.1056/NEJMoa1510687  
14  
15
- 16 29. Burns C, Bagnall RD, Lam L, et al. Multiple Gene Variants in Hypertrophic  
17 Cardiomyopathy in the Era of Next-Generation Sequencing. *Circ Cardiovasc Genet*  
18 2017;10(4) doi: 10.1161/CIRCGENETICS.116.001666  
19
- 20 30. Richards S, Aziz N, Bale S, et al. Standards and guidelines for the interpretation of  
21 sequence variants: a joint consensus recommendation of the American College of Medical  
22 Genetics and Genomics and the Association for Molecular Pathology. *Genetics in*  
23 *Medicine* 2015;17(5):405-24. doi: 10.1038/gim.2015.30  
24  
25
- 26 31. Smagarinsky Y, Burns C, Spinks C, et al. Development of a communication aid for  
27 explaining hypertrophic cardiomyopathy genetic test results. *Pilot Feasibility Stud*  
28 2017;3:53. doi: 10.1186/s40814-017-0205-0  
29
- 30 32. Read CY, Perry DJ, Duffy ME. Design and psychometric evaluation of the  
31 Psychological Adaptation to Genetic Information Scale. *J Nurs Scholarsh* 2005;37(3):203-  
32 8.  
33  
34
- 35 33. Kasparian NA, Wakefield CE, Meiser B. Assessment of psychosocial outcomes in  
36 genetic counseling research: an overview of available measurement scales. *Journal of*  
37 *genetic counseling* 2007;16(6):693-712. doi: 10.1007/s10897-007-9111-6 [published  
38 Online First: 2007/08/19]  
39
- 40 34. Erlich J, Brown K, Kim YM, et al. Development and validation of a breast cancer  
41 genetic counseling knowledge questionnaire. *Patient Educ Couns* 2005;56(2):182-91. doi:  
42 10.1016/j.pec.2004.02.007  
43  
44
- 45 35. Shiloh S, Avdor O, Goodman RM. Satisfaction with genetic counseling: dimensions  
46 and measurement. *American journal of medical genetics* 1990;37(4):522-9. doi:  
47 10.1002/ajmg.1320370419 [published Online First: 1990/12/01]  
48
- 49 36. McAllister M, Wood AM, Dunn G, et al. The Genetic Counseling Outcome Scale: a new  
50 patient-reported outcome measure for clinical genetics services. *Clinical genetics*  
51 2011;79(5):413-24. doi: 10.1111/j.1399-0004.2011.01636.x [published Online First:  
52 2011/01/25]  
53  
54
- 55 37. Ko C, Arscott P, Concannon M, et al. Genetic testing impacts the utility of prospective  
56 familial screening in hypertrophic cardiomyopathy through identification of a nonfamilial  
57 subgroup. *Genet Med* 2017 doi: 10.1038/gim.2017.79  
58  
59  
60



**Table 1: Trial Registration Data**

|                                               |                                                                                                                                                                         |
|-----------------------------------------------|-------------------------------------------------------------------------------------------------------------------------------------------------------------------------|
| Primary registry and trial identifying number | Australian New Zealand Clinical Trials Registry:<br>ACTRN12617000706370                                                                                                 |
| Date of registration in primary registry      | 17/05/2017                                                                                                                                                              |
| Secondary identifying numbers                 | NA                                                                                                                                                                      |
| Source(s) of monetary or material support     | National Heart Foundation of Australia                                                                                                                                  |
| Primary sponsor                               | The University of Sydney                                                                                                                                                |
| Secondary sponsor                             | NA                                                                                                                                                                      |
| Contact for public queries                    | Dr Jodie Ingles<br><a href="mailto:j.ingles@centenary.org.au">j.ingles@centenary.org.au</a>                                                                             |
| Contact for scientific queries                | Dr Jodie Ingles<br><a href="mailto:j.ingles@centenary.org.au">j.ingles@centenary.org.au</a>                                                                             |
| Public title                                  | Use of an aid to improve communication of genetic risk information to families with hypertrophic cardiomyopathy (HCM)                                                   |
| Scientific title                              | Use of a custom designed aid to improve communication of genetic results in families with HCM                                                                           |
| Countries of recruitment                      | Australia                                                                                                                                                               |
| Health condition (s) or problem (s) studied   | HCM                                                                                                                                                                     |
| Intervention                                  | Use of a custom designed aid to communicate HCM genetic test results                                                                                                    |
| Key inclusion and exclusion criteria          | HCM probands with a genetic result ready for return<br>Participants must be aged 18 years or older<br>Sufficient written English skills as nominated by the participant |
| Study type                                    | Prospective randomised controlled trial                                                                                                                                 |
| Date of first enrolment                       | 25/11/2016                                                                                                                                                              |
| Target sample size                            | 45                                                                                                                                                                      |
| Recruitment status                            | Recruiting                                                                                                                                                              |
| Primary outcome (s)                           | Ability and confidence of the proband to communicate genetic results to at-risk relatives                                                                               |
| Key secondary outcomes                        | Secondary outcomes will assess genetic knowledge, satisfaction with services, outcomes from genetic counselling and psychological adaptation to genetic information     |

1  
2  
3  
4  
5  
6  
7  
8  
9  
10  
11  
12  
13  
14  
15  
16  
17  
18  
19  
20  
21  
22  
23  
24  
25  
26  
27  
28  
29  
30  
31  
32  
33  
34  
35  
36  
37  
38  
39  
40  
41  
42  
43  
44  
45  
46  
47  
48  
49  
50  
51  
52  
53  
54  
55  
56  
57  
58  
59  
60

---

**Table 2: Certainty sub-scale of the PAGIS scale**

---

1. I understand how I came to have hypertrophic cardiomyopathy
  2. I understand the health risks my relatives face because of hypertrophic cardiomyopathy
  3. I feel certain that I understand the meaning of having hypertrophic cardiomyopathy
  4. I understand the chances I have of passing hypertrophic cardiomyopathy along to my children
  5. I feel that I can explain to other people what having hypertrophic cardiomyopathy means
  6. I feel confused because I have been given different explanations of what having hypertrophic cardiomyopathy means
- 

Abbreviations: PAGIS = Psychological Adaptation to Genetic Information Scale.

---

**Table 3: Primary outcome measure converted to a primary outcome**

---

Measures incorporated

1. Certainty sub scale from PAGIS (measuring confidence)
2. Adult first degree relatives informed of genetic risk (measuring ability)

### Calculation examples

#### Example 1:

Certainty score from PAGIS sub scale =  $18/36 = 0.5$

Relatives informed of risk =  $3/6 = 0.5$

=  $(0.5 + 0.5 = 1) / 2 = 0.5$

= 50%

Therefore this participant falls into the 'poor communication' category of the primary outcome

#### Example 2:

Certainty score from PAGIS sub scale =  $30/36 = 0.83$

Relatives informed of risk =  $7/8 = 0.88$

$(0.88 + 0.83) / 2 = 0.86$

= 86%

Therefore this participant falls into the 'fair communication' category of this primary outcome

---

Abbreviations: PAGIS = Psychological Adaptation to Genetic Information Scale.

1  
2  
3  
4  
5  
6  
7  
8  
9  
10  
11  
12  
13  
14  
15  
16  
17  
18  
19  
20  
21  
22  
23  
24  
25  
26  
27  
28  
29  
30  
31  
32  
33  
34  
35  
36  
37  
38  
39  
40  
41  
42  
43  
44  
45  
46  
47  
48  
49  
50  
51  
52  
53  
54  
55  
56  
57  
58  
59  
60

**FIGURE LEGENDS**

**FIGURE 1:** Flow chart of overall study design

**FIGURE 2:** Example page from communication aid: Genetic testing step by step

**FIGURE 3:** Example page from communication aid: What is my genetic result?

**FIGURE 4:** Example page from communication aid: Family-screening guidelines

For peer review only

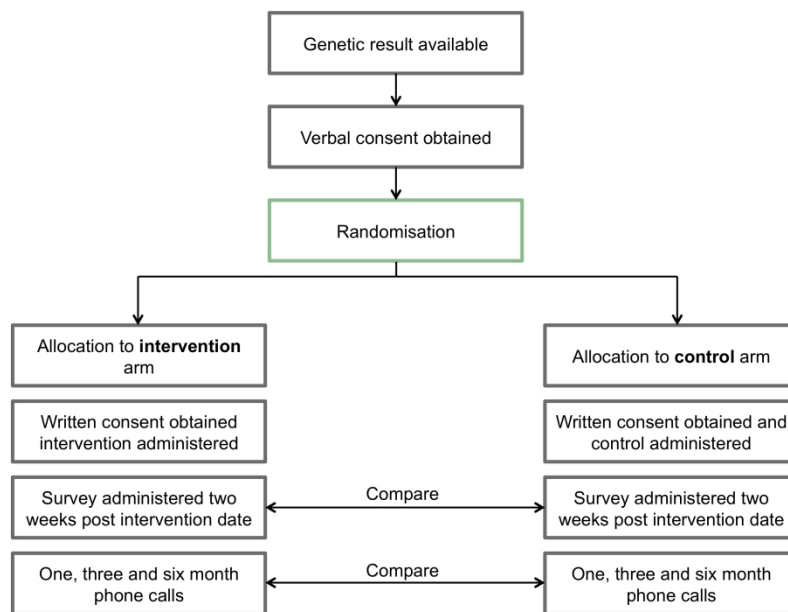

Figure 1

297x209mm (300 x 300 DPI)

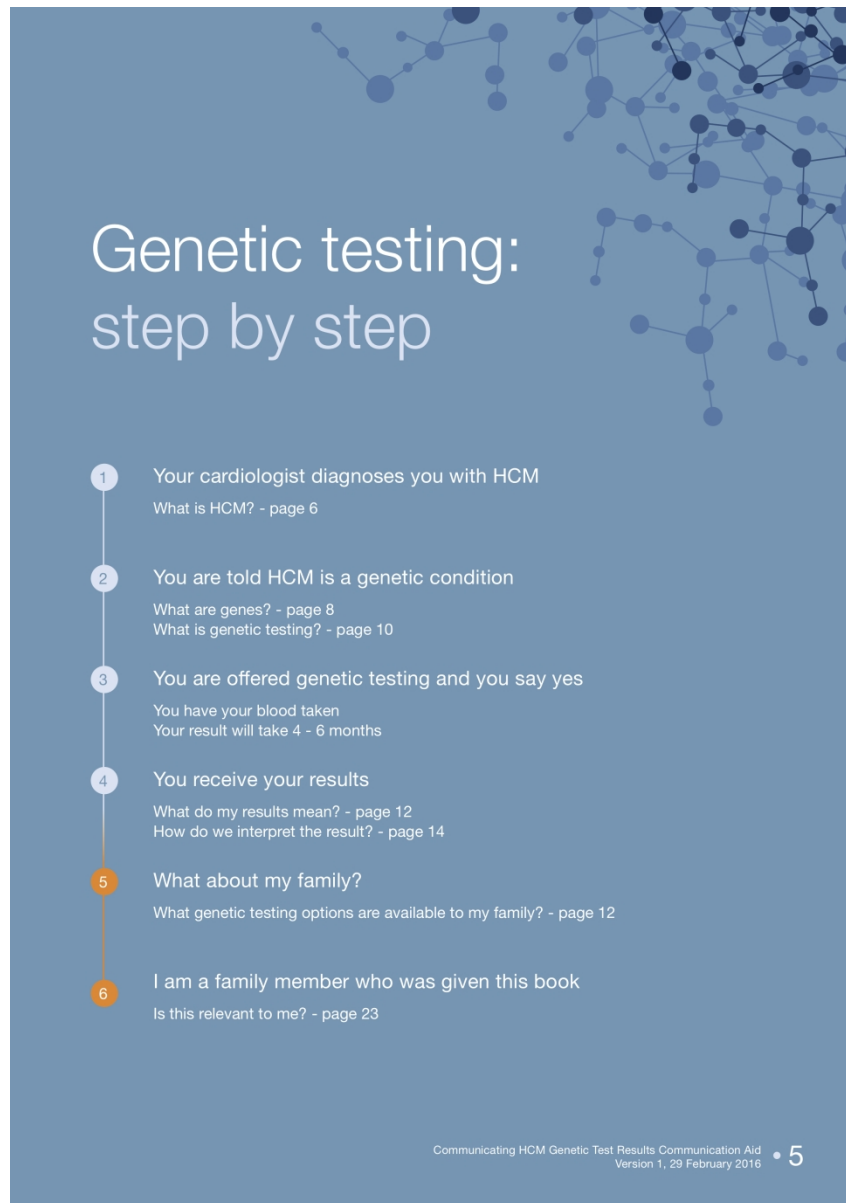

Figure 2

209x296mm (300 x 300 DPI)

# What is my genetic result?

| Test Result                                               | The Impact for You                                                                                           | The Impact for Your Family                                                                                      |
|-----------------------------------------------------------|--------------------------------------------------------------------------------------------------------------|-----------------------------------------------------------------------------------------------------------------|
| <b>Pathogenic</b><br>(page 18)                            | This result is considered to be the definite cause of your disease.                                          | We can look for the same variant in family members (cascade genetic testing).                                   |
| <b>Likely (probably) pathogenic</b><br>(page 18)          | This result is considered to be important and with the available evidence is thought to be the cause of HCM. | We can look for the same variant in family members (cascade genetic testing).                                   |
| <b>Variant of unknown significance (VUS)</b><br>(page 20) | Currently we do not know if this variant is the cause of HCM or not. More evidence is needed.                | Continue with current clinical screening guidelines, no cascade genetic testing options available at this time. |
| <b>Benign or likely benign</b><br>(page 16)               | This variant is not the cause of HCM.                                                                        | Continue with current clinical screening guidelines, no cascade genetic testing options available at this time. |
| <b>No variant identified (indeterminate)</b><br>(page 15) | No HCM variants have been identified.                                                                        | Continue with current clinical screening guidelines, no cascade genetic testing options available at this time. |

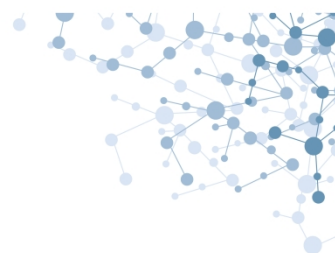

How certain are we that a variant is the cause of HCM?

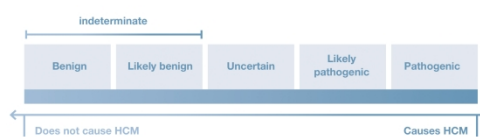

Figure 3

374x197mm (300 x 300 DPI)

1  
2  
3  
4  
5  
6  
7  
8  
9  
10  
11  
12  
13  
14  
15  
16  
17  
18  
19  
20  
21  
22  
23  
24  
25  
26  
27  
28  
29  
30  
31  
32  
33  
34  
35  
36  
37  
38  
39  
40  
41  
42  
43  
44  
45  
46  
47  
48  
49  
50  
51  
52  
53  
54  
55  
56  
57  
58  
59  
60

# My family summary

Sharing this booklet with family members is encouraged.

If you're a family member reading this booklet, hopefully you will find some details below that apply directly to you.

All first-degree relatives of someone with HCM are recommended to have clinical screening to check for signs of HCM. This includes children, brothers/sisters and parents.

Clinical screening involves: echocardiogram (ultrasound of the heart) electrocardiogram (or ECG, an electrical trace of the heart rhythm), and physical examination with a cardiologist.

| First name | Relation | Age | Clinical Screening | Genetic testing possibilities |
|------------|----------|-----|--------------------|-------------------------------|
|            |          |     |                    |                               |
|            |          |     |                    |                               |
|            |          |     |                    |                               |
|            |          |     |                    |                               |
|            |          |     |                    |                               |
|            |          |     |                    |                               |
|            |          |     |                    |                               |
|            |          |     |                    |                               |
|            |          |     |                    |                               |
|            |          |     |                    |                               |

## Clinical screening guidelines for family members

| Family member's age | How often you should see a cardiologist |
|---------------------|-----------------------------------------|
| 0 - 5 years         | Optional                                |
| 6 - 10 years        | Every 3 - 5 years                       |
| 11 - 20 years       | Every 12 - 18 months                    |
| 21 - 30 years       | Every 2 - 3 years                       |
| 31 or more years    | Every 3 - 5 years                       |

This only applies to first-degree relatives (i.e. parents, brother/sister and children) of someone with HCM. If anyone in the family is having any symptoms suggesting a heart problem, they should see a cardiologist.

Figure 4

349x225mm (300 x 300 DPI)



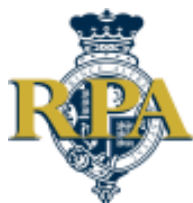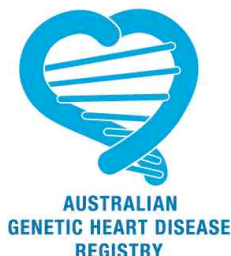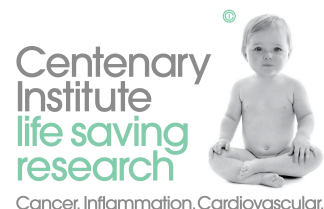

## **Communicating Hypertrophic Cardiomyopathy (HCM) Genetic Test Results**

### **INFORMATION FOR PARTICIPANTS**

#### **Introduction**

You are invited to take part in a research study examining how we can best communicate genetic test results in hypertrophic cardiomyopathy (HCM). Genetic testing for genetic heart diseases like HCM has become increasingly complex and our method of explaining these results needs to evolve to meet these changing needs. Cardiac genetic counsellors coordinate the genetic testing process and they play a key role in ensuring the information you are receiving is clear and meaningful for you and your family. The objective of this study is to compare the effectiveness of an intervention aimed at improving the way we communicate genetic test result information with our current usual care. If you consent to the study, you will be randomly assigned to either the new communication intervention or to usual care.

Individuals with hypertrophic cardiomyopathy are eligible to participate in this study if they are the first in their family to have genetic testing. People aged 16 years or older are eligible to participate; however children younger than this are excluded.

The study is being conducted by Dr Jodie Ingles, Prof Christopher Semsarian, Ms Laura Yeates and Ms Charlotte Burns from the Molecular Cardiology Research Program, Centenary Institute and Royal Prince Alfred Hospital Sydney.

#### **Study Procedures**

If you agree to participate in this study, you will be asked to complete the participant consent form. You will then be randomly allocated to one of two groups, to receive your genetic test result. Two weeks after your genetic test result appointment, you will be asked to complete a survey (*either paper or online*), asking about your understanding of genetic testing for HCM. This survey will take between 10-20 minutes to complete.

**In addition, the researchers would like to phone you at one, three and six month intervals to follow up with you after you receive your genetic result. These phone calls will take approximately 10 minutes and will be conducted at a time that suits you.**

1 Researchers will have access to your medical record to obtain information relevant  
2 to this study. Information about you may also be sought from the *Australian Genetic*  
3 *Heart Disease Registry*, if you have enrolled ([www.heartregistry.org.au](http://www.heartregistry.org.au)).  
4 Confidentiality of the survey responses will be paramount. Your name will be  
5 replaced with a unique code and only Dr Jodie Ingles will have access to the true  
6 identity of respondents.  
7

8  
9 No additional genetic testing will be carried out as part of this study.

10  
11 Information collected about you will be securely stored.  
12

### 13 **Benefits**

14  
15 While we intend that this research study furthers medical knowledge and may  
16 improve management of genetic heart diseases in the future, it may not be of direct  
17 benefit to you.  
18

### 19 **Voluntary Participation**

20  
21 Participation in this study is entirely voluntary. You do not have to take part in it. If  
22 you do take part, you can withdraw at any time without having to give a reason.  
23 Whatever your decision, please be assured that it will not affect your medical  
24 treatment or your relationship with the staff who are caring for you.  
25

### 26 **Confidentiality**

27  
28 All of the information collected from you for the study will be treated confidentially,  
29 and only the researchers named above will have access to it. The study results may  
30 be presented at a conference or in a scientific publication, but individual participants  
31 will not be identifiable in such a presentation.  
32

33  
34 Any forms completed online, including the participant consent form and survey will  
35 be extremely secure to maintain participant privacy.  
36

### 37 **Further Information**

38  
39 When you have read this information, one of the investigators is available to discuss  
40 it with you further and answer any questions you may have. If you would like to  
41 know more at any stage, please feel free to contact:  
42

#### 43 ***Dr Jodie Ingles***

44 Molecular Cardiology Research Program

45 Centenary Institute

46 Locked Bag No 6, Newtown NSW 2042

47 Ph. 02 9565 6293

48 Email. [j.ingles@centenary.org.au](mailto:j.ingles@centenary.org.au) Web. [www.heartregistry.org.au](http://www.heartregistry.org.au)  
49

50  
51 This information sheet is for you to keep.  
52

### 53 **Ethics Approval and Complaints**

1 This study has been approved by the Ethics Review Committee (RPAH Zone) of the  
2 Sydney Local Health District. Any person with concerns or complaints about the  
3 conduct of this study should contact the Executive Officer on 02 9515 6766 and quote  
4 protocol number X16-0030.  
5  
6  
7  
8  
9  
10  
11  
12  
13  
14  
15  
16  
17  
18  
19  
20  
21  
22  
23  
24  
25  
26  
27  
28  
29  
30  
31  
32  
33  
34  
35  
36  
37  
38  
39  
40  
41  
42  
43  
44  
45  
46  
47  
48  
49  
50  
51  
52  
53  
54  
55  
56  
57  
58  
59  
60

For peer review only



# Communicating Hypertrophic Cardiomyopathy (HCM) Genetic Test Results

## PARTICIPANT CONSENT FORM

I, ..... [name]  
 of ..... [address]  
 ..... [email]

have read and understood the Information for Participants on the abovenamed research study  
 and have discussed the study with .....

I have been made aware of the procedures involved in the study.

I understand that my participation in this study will allow the researchers to have access to my medical record, including information held by the Australian Genetic Heart Disease Registry (if I am enrolled), and I agree to this.

I freely choose to participate in this study and understand that I can withdraw at any time.

I also understand that the research study is strictly confidential.

I hereby agree to participate in this research study.

**NAME:** .....

**SIGNATURE:** .....

**DATE:** .....

**NAME OF WITNESS:** .....

**SIGNATURE OF WITNESS:** .....

Hello, this is (Insert Name) from the Centenary Institute, may I please speak to (Participant name)?

I am phoning (as we discussed back in (insert month of genetic result return) to follow up with you after you received your genetic result as part of our research into communicating genetic results. This is your (one month, three month, six month) follow up phone call. I was hoping to get some additional information from you regarding your gene result. Do you have 10 minutes or so to do this now- or I can arrange a more appropriate time?

---

**SECTION 1: 3-generation pedigree documented – Have this documented prior to phone call. Confirm during phone call.**

---

## **SECTION 2**

**Who in the family have you told about the following: (List names/details):  
Your diagnosis of HCM?**

**About your genetic result?**

**Who in the family has had an echo/ecg/Cardiology review- Outcome?  
(Assess against guidelines)?**

**Who in the family has had genetic testing- Outcome?**

**Who in the family is awaiting an appointment- with whom?**

---

## **SECTION 3:**

Total number of first degree relatives informed of diagnosis =

Total number of first degree relatives informed of genetic test outcome=

Total number of first degree relatives who have had cardiology review=

Total number of first degree relatives who have had genetic review=

Total number of first degree relatives awaiting review=

Total number of first degree relatives with a positive clinical screen=

Total number of relatives with a negative clinical screen =

Total number of first degree relatives with a positive genetic result =

Total number of first degree relatives with a negative genetic result=

Total number of other relatives informed =

# Reporting checklist for protocol of a clinical trial.

Based on the SPIRIT guidelines.

## Instructions to authors

Complete this checklist by entering the page numbers from your manuscript where readers will find each of the items listed below.

Your article may not currently address all the items on the checklist. Please modify your text to include the missing information. If you are certain that an item does not apply, please write "n/a" and provide a short explanation.

Upload your completed checklist as an extra file when you submit to a journal.

In your methods section, say that you used the SPIRIT reporting guidelines, and cite them as:

Chan A-W, Tetzlaff JM, Altman DG, Laupacis A, Gøtzsche PC, Krleža-Jerić K, Hróbjartsson A, Mann H, Dickersin K, Berlin J, Doré C, Parulekar W, Summerskill W, Groves T, Schulz K, Sox H, Rockhold FW, Rennie D, Moher D. SPIRIT 2013 Statement: Defining standard protocol items for clinical trials. *Ann Intern Med.* 2013;158(3):200-207

|                                             |                     | Reporting Item                                                                                               | Page Number                  |
|---------------------------------------------|---------------------|--------------------------------------------------------------------------------------------------------------|------------------------------|
| Title                                       | <a href="#">#1</a>  | Descriptive title identifying the study design, population, interventions, and, if applicable, trial acronym | <b>1</b>                     |
| Trial registration                          | <a href="#">#2a</a> | Trial identifier and registry name. If not yet registered, name of intended registry                         | <b>2, Table 1</b>            |
| Trial registration: data set                | <a href="#">#2b</a> | All items from the World Health Organization Trial Registration Data Set                                     | <b>9, Table 1</b>            |
| Protocol version                            | <a href="#">#3</a>  | Date and version identifier                                                                                  | <b>1</b>                     |
| Funding                                     | <a href="#">#4</a>  | Sources and types of financial, material, and other support                                                  | <b>18</b>                    |
| Roles and responsibilities: contributorship | <a href="#">#5a</a> | Names, affiliations, and roles of protocol contributors                                                      | <b>1, 18</b>                 |
| Roles and                                   | <a href="#">#5b</a> | Name and contact information for the trial                                                                   | <b>NA- No trial sponsor.</b> |

|    |                   |                     |                                              |                               |
|----|-------------------|---------------------|----------------------------------------------|-------------------------------|
| 1  | responsibilities: |                     | sponsor                                      |                               |
| 2  | sponsor contact   |                     |                                              |                               |
| 3  | information       |                     |                                              |                               |
| 4  |                   |                     |                                              |                               |
| 5  | Roles and         | <a href="#">#5c</a> | Role of study sponsor and funders, if any,   | <b>NA- no role other than</b> |
| 6  | responsibilities: |                     | in study design; collection, management,     | <b>funding for key</b>        |
| 7  | sponsor and       |                     | analysis, and interpretation of data;        | <b>researchers.</b>           |
| 8  | funder            |                     | writing of the report; and the decision to   |                               |
| 9  |                   |                     | submit the report for publication, including |                               |
| 10 |                   |                     | whether they will have ultimate authority    |                               |
| 11 |                   |                     | over any of these activities                 |                               |
| 12 |                   |                     |                                              |                               |
| 13 |                   |                     |                                              |                               |
| 14 |                   |                     |                                              |                               |
| 15 |                   |                     |                                              |                               |
| 16 | Roles and         | <a href="#">#5d</a> | Composition, roles, and responsibilities of  | <b>NA</b>                     |
| 17 | responsibilities: |                     | the coordinating centre, steering            |                               |
| 18 | committees        |                     | committee, endpoint adjudication             |                               |
| 19 |                   |                     | committee, data management team, and         |                               |
| 20 |                   |                     | other individuals or groups overseeing       |                               |
| 21 |                   |                     | the trial, if applicable (see Item 21a for   |                               |
| 22 |                   |                     | data monitoring committee)                   |                               |
| 23 |                   |                     |                                              |                               |
| 24 |                   |                     |                                              |                               |
| 25 |                   |                     |                                              |                               |
| 26 |                   |                     |                                              |                               |
| 27 |                   |                     |                                              |                               |
| 28 | Background and    | <a href="#">#6a</a> | Description of research question and         | <b>4</b>                      |
| 29 | rationale         |                     | justification for undertaking the trial,     |                               |
| 30 |                   |                     | including summary of relevant studies        |                               |
| 31 |                   |                     | (published and unpublished) examining        |                               |
| 32 |                   |                     | benefits and harms for each intervention     |                               |
| 33 |                   |                     |                                              |                               |
| 34 |                   |                     |                                              |                               |
| 35 |                   |                     |                                              |                               |
| 36 | Background and    | <a href="#">#6b</a> | Explanation for choice of comparators        | <b>11</b>                     |
| 37 | rationale: choice |                     |                                              |                               |
| 38 | of comparators    |                     |                                              |                               |
| 39 |                   |                     |                                              |                               |
| 40 |                   |                     |                                              |                               |
| 41 | Objectives        | <a href="#">#7</a>  | Specific objectives or hypotheses            | <b>7,8</b>                    |
| 42 |                   |                     |                                              |                               |
| 43 |                   |                     |                                              |                               |
| 44 | Trial design      | <a href="#">#8</a>  | Description of trial design including type   | <b>9</b>                      |
| 45 |                   |                     | of trial (eg, parallel group, crossover,     |                               |
| 46 |                   |                     | factorial, single group), allocation ratio,  |                               |
| 47 |                   |                     | and framework (eg, superiority,              |                               |
| 48 |                   |                     | equivalence, non-inferiority, exploratory)   |                               |
| 49 |                   |                     |                                              |                               |
| 50 |                   |                     |                                              |                               |
| 51 |                   |                     |                                              |                               |
| 52 | Study setting     | <a href="#">#9</a>  | Description of study settings (eg,           | <b>9</b>                      |
| 53 |                   |                     | community clinic, academic hospital) and     |                               |
| 54 |                   |                     | list of countries where data will be         |                               |
| 55 |                   |                     | collected. Reference to where list of study  |                               |
| 56 |                   |                     | sites can be obtained                        |                               |
| 57 |                   |                     |                                              |                               |
| 58 |                   |                     |                                              |                               |
| 59 |                   |                     |                                              |                               |
| 60 |                   |                     |                                              |                               |

|    |                      |                      |                                                                                                                                                                                                                                                                                                                                                                                |                                                    |
|----|----------------------|----------------------|--------------------------------------------------------------------------------------------------------------------------------------------------------------------------------------------------------------------------------------------------------------------------------------------------------------------------------------------------------------------------------|----------------------------------------------------|
| 1  | Eligibility criteria | <a href="#">#10</a>  | Inclusion and exclusion criteria for participants. If applicable, eligibility criteria for study centres and individuals who will perform the interventions (eg, surgeons, psychotherapists)                                                                                                                                                                                   | <b>9</b>                                           |
| 2  |                      |                      |                                                                                                                                                                                                                                                                                                                                                                                |                                                    |
| 3  |                      |                      |                                                                                                                                                                                                                                                                                                                                                                                |                                                    |
| 4  |                      |                      |                                                                                                                                                                                                                                                                                                                                                                                |                                                    |
| 5  |                      |                      |                                                                                                                                                                                                                                                                                                                                                                                |                                                    |
| 6  |                      |                      |                                                                                                                                                                                                                                                                                                                                                                                |                                                    |
| 7  |                      |                      |                                                                                                                                                                                                                                                                                                                                                                                |                                                    |
| 8  |                      |                      |                                                                                                                                                                                                                                                                                                                                                                                |                                                    |
| 9  | Interventions:       | <a href="#">#11a</a> | Interventions for each group with sufficient detail to allow replication, including how and when they will be administered                                                                                                                                                                                                                                                     | <b>11</b>                                          |
| 10 | description          |                      |                                                                                                                                                                                                                                                                                                                                                                                |                                                    |
| 11 |                      |                      |                                                                                                                                                                                                                                                                                                                                                                                |                                                    |
| 12 |                      |                      |                                                                                                                                                                                                                                                                                                                                                                                |                                                    |
| 13 |                      |                      |                                                                                                                                                                                                                                                                                                                                                                                |                                                    |
| 14 |                      |                      |                                                                                                                                                                                                                                                                                                                                                                                |                                                    |
| 15 |                      |                      |                                                                                                                                                                                                                                                                                                                                                                                |                                                    |
| 16 | Interventions:       | <a href="#">#11b</a> | Criteria for discontinuing or modifying allocated interventions for a given trial participant (eg, drug dose change in response to harms, participant request, or improving / worsening disease)                                                                                                                                                                               | <b>NA</b>                                          |
| 17 | modifications        |                      |                                                                                                                                                                                                                                                                                                                                                                                |                                                    |
| 18 |                      |                      |                                                                                                                                                                                                                                                                                                                                                                                |                                                    |
| 19 |                      |                      |                                                                                                                                                                                                                                                                                                                                                                                |                                                    |
| 20 |                      |                      |                                                                                                                                                                                                                                                                                                                                                                                |                                                    |
| 21 |                      |                      |                                                                                                                                                                                                                                                                                                                                                                                |                                                    |
| 22 |                      |                      |                                                                                                                                                                                                                                                                                                                                                                                |                                                    |
| 23 |                      |                      |                                                                                                                                                                                                                                                                                                                                                                                |                                                    |
| 24 | Interventions:       | <a href="#">#11c</a> | Strategies to improve adherence to intervention protocols, and any procedures for monitoring adherence (eg, drug tablet return; laboratory tests)                                                                                                                                                                                                                              | <b>NA- intervention was one clinic appointment</b> |
| 25 | adherence            |                      |                                                                                                                                                                                                                                                                                                                                                                                |                                                    |
| 26 |                      |                      |                                                                                                                                                                                                                                                                                                                                                                                |                                                    |
| 27 |                      |                      |                                                                                                                                                                                                                                                                                                                                                                                |                                                    |
| 28 |                      |                      |                                                                                                                                                                                                                                                                                                                                                                                |                                                    |
| 29 |                      |                      |                                                                                                                                                                                                                                                                                                                                                                                |                                                    |
| 30 |                      |                      |                                                                                                                                                                                                                                                                                                                                                                                |                                                    |
| 31 | Interventions:       | <a href="#">#11d</a> | Relevant concomitant care and interventions that are permitted or prohibited during the trial                                                                                                                                                                                                                                                                                  | <b>NA</b>                                          |
| 32 | concomitant care     |                      |                                                                                                                                                                                                                                                                                                                                                                                |                                                    |
| 33 |                      |                      |                                                                                                                                                                                                                                                                                                                                                                                |                                                    |
| 34 |                      |                      |                                                                                                                                                                                                                                                                                                                                                                                |                                                    |
| 35 |                      |                      |                                                                                                                                                                                                                                                                                                                                                                                |                                                    |
| 36 | Outcomes             | <a href="#">#12</a>  | Primary, secondary, and other outcomes, including the specific measurement variable (eg, systolic blood pressure), analysis metric (eg, change from baseline, final value, time to event), method of aggregation (eg, median, proportion), and time point for each outcome. Explanation of the clinical relevance of chosen efficacy and harm outcomes is strongly recommended | <b>12,13,14</b>                                    |
| 37 |                      |                      |                                                                                                                                                                                                                                                                                                                                                                                |                                                    |
| 38 |                      |                      |                                                                                                                                                                                                                                                                                                                                                                                |                                                    |
| 39 |                      |                      |                                                                                                                                                                                                                                                                                                                                                                                |                                                    |
| 40 |                      |                      |                                                                                                                                                                                                                                                                                                                                                                                |                                                    |
| 41 |                      |                      |                                                                                                                                                                                                                                                                                                                                                                                |                                                    |
| 42 |                      |                      |                                                                                                                                                                                                                                                                                                                                                                                |                                                    |
| 43 |                      |                      |                                                                                                                                                                                                                                                                                                                                                                                |                                                    |
| 44 |                      |                      |                                                                                                                                                                                                                                                                                                                                                                                |                                                    |
| 45 |                      |                      |                                                                                                                                                                                                                                                                                                                                                                                |                                                    |
| 46 |                      |                      |                                                                                                                                                                                                                                                                                                                                                                                |                                                    |
| 47 |                      |                      |                                                                                                                                                                                                                                                                                                                                                                                |                                                    |
| 48 |                      |                      |                                                                                                                                                                                                                                                                                                                                                                                |                                                    |
| 49 |                      |                      |                                                                                                                                                                                                                                                                                                                                                                                |                                                    |
| 50 |                      |                      |                                                                                                                                                                                                                                                                                                                                                                                |                                                    |
| 51 |                      |                      |                                                                                                                                                                                                                                                                                                                                                                                |                                                    |
| 52 | Participant          | <a href="#">#13</a>  | Time schedule of enrolment, interventions (including any run-ins and washouts), assessments, and visits for participants. A schematic diagram is highly recommended (see Figure)                                                                                                                                                                                               | <b>8, Figure 1</b>                                 |
| 53 | timeline             |                      |                                                                                                                                                                                                                                                                                                                                                                                |                                                    |
| 54 |                      |                      |                                                                                                                                                                                                                                                                                                                                                                                |                                                    |
| 55 |                      |                      |                                                                                                                                                                                                                                                                                                                                                                                |                                                    |
| 56 |                      |                      |                                                                                                                                                                                                                                                                                                                                                                                |                                                    |
| 57 |                      |                      |                                                                                                                                                                                                                                                                                                                                                                                |                                                    |
| 58 |                      |                      |                                                                                                                                                                                                                                                                                                                                                                                |                                                    |
| 59 |                      |                      |                                                                                                                                                                                                                                                                                                                                                                                |                                                    |



|    |                                                   |                      |                                                                                                                                                                                                                                                                                                                                                          |                                                                                                                                       |
|----|---------------------------------------------------|----------------------|----------------------------------------------------------------------------------------------------------------------------------------------------------------------------------------------------------------------------------------------------------------------------------------------------------------------------------------------------------|---------------------------------------------------------------------------------------------------------------------------------------|
| 1  | Sample size                                       | <a href="#">#14</a>  | Estimated number of participants needed to achieve study objectives and how it was determined, including clinical and statistical assumptions supporting any sample size calculations                                                                                                                                                                    | <b>10</b>                                                                                                                             |
| 2  |                                                   |                      |                                                                                                                                                                                                                                                                                                                                                          |                                                                                                                                       |
| 3  |                                                   |                      |                                                                                                                                                                                                                                                                                                                                                          |                                                                                                                                       |
| 4  |                                                   |                      |                                                                                                                                                                                                                                                                                                                                                          |                                                                                                                                       |
| 5  |                                                   |                      |                                                                                                                                                                                                                                                                                                                                                          |                                                                                                                                       |
| 6  |                                                   |                      |                                                                                                                                                                                                                                                                                                                                                          |                                                                                                                                       |
| 7  |                                                   |                      |                                                                                                                                                                                                                                                                                                                                                          |                                                                                                                                       |
| 8  |                                                   |                      |                                                                                                                                                                                                                                                                                                                                                          |                                                                                                                                       |
| 9  | Recruitment                                       | <a href="#">#15</a>  | Strategies for achieving adequate participant enrolment to reach target sample size                                                                                                                                                                                                                                                                      | <b>9</b>                                                                                                                              |
| 10 |                                                   |                      |                                                                                                                                                                                                                                                                                                                                                          |                                                                                                                                       |
| 11 |                                                   |                      |                                                                                                                                                                                                                                                                                                                                                          |                                                                                                                                       |
| 12 |                                                   |                      |                                                                                                                                                                                                                                                                                                                                                          |                                                                                                                                       |
| 13 |                                                   |                      |                                                                                                                                                                                                                                                                                                                                                          |                                                                                                                                       |
| 14 | Allocation:<br>sequence<br>generation             | <a href="#">#16a</a> | Method of generating the allocation sequence (eg, computer-generated random numbers), and list of any factors for stratification. To reduce predictability of a random sequence, details of any planned restriction (eg, blocking) should be provided in a separate document that is unavailable to those who enrol participants or assign interventions | <b>9,10</b>                                                                                                                           |
| 15 |                                                   |                      |                                                                                                                                                                                                                                                                                                                                                          |                                                                                                                                       |
| 16 |                                                   |                      |                                                                                                                                                                                                                                                                                                                                                          |                                                                                                                                       |
| 17 |                                                   |                      |                                                                                                                                                                                                                                                                                                                                                          |                                                                                                                                       |
| 18 |                                                   |                      |                                                                                                                                                                                                                                                                                                                                                          |                                                                                                                                       |
| 19 |                                                   |                      |                                                                                                                                                                                                                                                                                                                                                          |                                                                                                                                       |
| 20 |                                                   |                      |                                                                                                                                                                                                                                                                                                                                                          |                                                                                                                                       |
| 21 |                                                   |                      |                                                                                                                                                                                                                                                                                                                                                          |                                                                                                                                       |
| 22 |                                                   |                      |                                                                                                                                                                                                                                                                                                                                                          |                                                                                                                                       |
| 23 |                                                   |                      |                                                                                                                                                                                                                                                                                                                                                          |                                                                                                                                       |
| 24 |                                                   |                      |                                                                                                                                                                                                                                                                                                                                                          |                                                                                                                                       |
| 25 |                                                   |                      |                                                                                                                                                                                                                                                                                                                                                          |                                                                                                                                       |
| 26 |                                                   |                      |                                                                                                                                                                                                                                                                                                                                                          |                                                                                                                                       |
| 27 |                                                   |                      |                                                                                                                                                                                                                                                                                                                                                          |                                                                                                                                       |
| 28 |                                                   |                      |                                                                                                                                                                                                                                                                                                                                                          |                                                                                                                                       |
| 29 | Allocation<br>concealment<br>mechanism            | <a href="#">#16b</a> | Mechanism of implementing the allocation sequence (eg, central telephone; sequentially numbered, opaque, sealed envelopes), describing any steps to conceal the sequence until interventions are assigned                                                                                                                                                | <b>9,10</b>                                                                                                                           |
| 30 |                                                   |                      |                                                                                                                                                                                                                                                                                                                                                          |                                                                                                                                       |
| 31 |                                                   |                      |                                                                                                                                                                                                                                                                                                                                                          |                                                                                                                                       |
| 32 |                                                   |                      |                                                                                                                                                                                                                                                                                                                                                          |                                                                                                                                       |
| 33 |                                                   |                      |                                                                                                                                                                                                                                                                                                                                                          |                                                                                                                                       |
| 34 |                                                   |                      |                                                                                                                                                                                                                                                                                                                                                          |                                                                                                                                       |
| 35 |                                                   |                      |                                                                                                                                                                                                                                                                                                                                                          |                                                                                                                                       |
| 36 |                                                   |                      |                                                                                                                                                                                                                                                                                                                                                          |                                                                                                                                       |
| 37 |                                                   |                      |                                                                                                                                                                                                                                                                                                                                                          |                                                                                                                                       |
| 38 |                                                   |                      |                                                                                                                                                                                                                                                                                                                                                          |                                                                                                                                       |
| 39 | Allocation:<br>implementation                     | <a href="#">#16c</a> | Who will generate the allocation sequence, who will enrol participants, and who will assign participants to interventions                                                                                                                                                                                                                                | <b>9,10</b>                                                                                                                           |
| 40 |                                                   |                      |                                                                                                                                                                                                                                                                                                                                                          |                                                                                                                                       |
| 41 |                                                   |                      |                                                                                                                                                                                                                                                                                                                                                          |                                                                                                                                       |
| 42 |                                                   |                      |                                                                                                                                                                                                                                                                                                                                                          |                                                                                                                                       |
| 43 |                                                   |                      |                                                                                                                                                                                                                                                                                                                                                          |                                                                                                                                       |
| 44 |                                                   |                      |                                                                                                                                                                                                                                                                                                                                                          |                                                                                                                                       |
| 45 | Blinding (masking)                                | <a href="#">#17a</a> | Who will be blinded after assignment to interventions (eg, trial participants, care providers, outcome assessors, data analysts), and how                                                                                                                                                                                                                | <b>15</b>                                                                                                                             |
| 46 |                                                   |                      |                                                                                                                                                                                                                                                                                                                                                          |                                                                                                                                       |
| 47 |                                                   |                      |                                                                                                                                                                                                                                                                                                                                                          |                                                                                                                                       |
| 48 |                                                   |                      |                                                                                                                                                                                                                                                                                                                                                          |                                                                                                                                       |
| 49 |                                                   |                      |                                                                                                                                                                                                                                                                                                                                                          |                                                                                                                                       |
| 50 |                                                   |                      |                                                                                                                                                                                                                                                                                                                                                          |                                                                                                                                       |
| 51 |                                                   |                      |                                                                                                                                                                                                                                                                                                                                                          |                                                                                                                                       |
| 52 | Blinding<br>(masking):<br>emergency<br>unblinding | <a href="#">#17b</a> | If blinded, circumstances under which unblinding is permissible, and procedure for revealing a participant's allocated intervention during the trial                                                                                                                                                                                                     | <b>NA- researcher will be blinded to treatment arm for analysis only, however researchers will not be blinded during intervention</b> |
| 53 |                                                   |                      |                                                                                                                                                                                                                                                                                                                                                          |                                                                                                                                       |
| 54 |                                                   |                      |                                                                                                                                                                                                                                                                                                                                                          |                                                                                                                                       |
| 55 |                                                   |                      |                                                                                                                                                                                                                                                                                                                                                          |                                                                                                                                       |
| 56 |                                                   |                      |                                                                                                                                                                                                                                                                                                                                                          |                                                                                                                                       |
| 57 |                                                   |                      |                                                                                                                                                                                                                                                                                                                                                          |                                                                                                                                       |
| 58 |                                                   |                      |                                                                                                                                                                                                                                                                                                                                                          |                                                                                                                                       |
| 59 |                                                   |                      |                                                                                                                                                                                                                                                                                                                                                          |                                                                                                                                       |
| 60 |                                                   |                      |                                                                                                                                                                                                                                                                                                                                                          |                                                                                                                                       |

**because of nature of intervention.**

|    |                      |                      |                                               |
|----|----------------------|----------------------|-----------------------------------------------|
| 1  |                      |                      |                                               |
| 2  |                      |                      |                                               |
| 3  |                      |                      |                                               |
| 4  | Data collection      | <a href="#">#18a</a> | Plans for assessment and collection of        |
| 5  | plan                 |                      | outcome, baseline, and other trial data,      |
| 6  |                      |                      | including any related processes to            |
| 7  |                      |                      | promote data quality (eg, duplicate           |
| 8  |                      |                      | measurements, training of assessors)          |
| 9  |                      |                      | and a description of study instruments        |
| 10 |                      |                      | (eg, questionnaires, laboratory tests)        |
| 11 |                      |                      | along with their reliability and validity, if |
| 12 |                      |                      | known. Reference to where data                |
| 13 |                      |                      | collection forms can be found, if not in the  |
| 14 |                      |                      | protocol                                      |
| 15 |                      |                      |                                               |
| 16 |                      |                      |                                               |
| 17 |                      |                      |                                               |
| 18 |                      |                      |                                               |
| 19 |                      |                      |                                               |
| 20 |                      |                      |                                               |
| 21 | Data collection      | <a href="#">#18b</a> | Plans to promote participant retention        |
| 22 | plan: retention      |                      | and complete follow-up, including list of     |
| 23 |                      |                      | any outcome data to be collected for          |
| 24 |                      |                      | participants who discontinue or deviate       |
| 25 |                      |                      | from intervention protocols                   |
| 26 |                      |                      |                                               |
| 27 |                      |                      |                                               |
| 28 |                      |                      |                                               |
| 29 | Data management      | <a href="#">#19</a>  | Plans for data entry, coding, security, and   |
| 30 |                      |                      | storage, including any related processes      |
| 31 |                      |                      | to promote data quality (eg, double data      |
| 32 |                      |                      | entry; range checks for data values).         |
| 33 |                      |                      | Reference to where details of data            |
| 34 |                      |                      | management procedures can be found, if        |
| 35 |                      |                      | not in the protocol                           |
| 36 |                      |                      |                                               |
| 37 |                      |                      |                                               |
| 38 |                      |                      |                                               |
| 39 |                      |                      |                                               |
| 40 |                      |                      |                                               |
| 41 | Statistics:          | <a href="#">#20a</a> | Statistical methods for analysing primary     |
| 42 | outcomes             |                      | and secondary outcomes. Reference             |
| 43 |                      |                      | to where other details of the statistical     |
| 44 |                      |                      | analysis plan can be found, if not in the     |
| 45 |                      |                      | protocol                                      |
| 46 |                      |                      |                                               |
| 47 |                      |                      |                                               |
| 48 |                      |                      |                                               |
| 49 | Statistics:          | <a href="#">#20b</a> | Methods for any additional analyses (eg,      |
| 50 | additional           |                      | subgroup and adjusted analyses)               |
| 51 | analyses             |                      |                                               |
| 52 |                      |                      |                                               |
| 53 |                      |                      |                                               |
| 54 | Statistics: analysis | <a href="#">#20c</a> | Definition of analysis population relating    |
| 55 | population and       |                      | to protocol non-adherence (eg, as             |
| 56 | missing data         |                      | randomised analysis), and any statistical     |
| 57 |                      |                      |                                               |
| 58 |                      |                      |                                               |
| 59 |                      |                      |                                               |
| 60 |                      |                      |                                               |

**12,13,14, Table 2, Figure 2, Figure 3, Figure 4**

**15**

**15**

**16**

**16**

**NA- not relevant to study design.**

|    |                   |                                                                 |                                    |
|----|-------------------|-----------------------------------------------------------------|------------------------------------|
| 1  |                   | methods to handle missing data (eg,                             |                                    |
| 2  |                   | multiple imputation)                                            |                                    |
| 3  |                   |                                                                 |                                    |
| 4  | Data monitoring:  | <a href="#">#21a</a> Composition of data monitoring             | <b>NA- not relevant, no data</b>   |
| 5  | formal committee  | committee (DMC); summary of its role                            | <b>monitoring committee.</b>       |
| 6  |                   | and reporting structure; statement of                           |                                    |
| 7  |                   | whether it is independent from the                              |                                    |
| 8  |                   | sponsor and competing interests; and                            |                                    |
| 9  |                   | reference to where further details about                        |                                    |
| 10 |                   | its charter can be found, if not in the                         |                                    |
| 11 |                   | protocol. Alternatively, an explanation of                      |                                    |
| 12 |                   | why a DMC is not needed                                         |                                    |
| 13 |                   |                                                                 |                                    |
| 14 |                   |                                                                 |                                    |
| 15 |                   |                                                                 |                                    |
| 16 |                   |                                                                 |                                    |
| 17 |                   |                                                                 |                                    |
| 18 | Data monitoring:  | <a href="#">#21b</a> Description of any interim analyses and    | <b>NA- no interim analysis.</b>    |
| 19 | interim analysis  | stopping guidelines, including who will                         |                                    |
| 20 |                   | have access to these interim results and                        |                                    |
| 21 |                   | make the final decision to terminate the                        |                                    |
| 22 |                   | trial                                                           |                                    |
| 23 |                   |                                                                 |                                    |
| 24 |                   |                                                                 |                                    |
| 25 |                   |                                                                 |                                    |
| 26 | Harms             | <a href="#">#22</a> Plans for collecting, assessing, reporting, | <b>NA</b>                          |
| 27 |                   | and managing solicited and                                      |                                    |
| 28 |                   | spontaneously reported adverse events                           |                                    |
| 29 |                   | and other unintended effects of trial                           |                                    |
| 30 |                   | interventions or trial conduct                                  |                                    |
| 31 |                   |                                                                 |                                    |
| 32 |                   |                                                                 |                                    |
| 33 |                   |                                                                 |                                    |
| 34 |                   |                                                                 |                                    |
| 35 | Auditing          | <a href="#">#23</a> Frequency and procedures for auditing       | <b>NA</b>                          |
| 36 |                   | trial conduct, if any, and whether the                          |                                    |
| 37 |                   | process will be independent from                                |                                    |
| 38 |                   | investigators and the sponsor                                   |                                    |
| 39 |                   |                                                                 |                                    |
| 40 |                   |                                                                 |                                    |
| 41 |                   |                                                                 |                                    |
| 42 | Research ethics   | <a href="#">#24</a> Plans for seeking research ethics           | <b>15</b>                          |
| 43 | approval          | committee / institutional review board                          |                                    |
| 44 |                   | (REC / IRB) approval                                            |                                    |
| 45 |                   |                                                                 |                                    |
| 46 |                   |                                                                 |                                    |
| 47 | Protocol          | <a href="#">#25</a> Plans for communicating important           | <b>NA- No protocol</b>             |
| 48 | amendments        | protocol modifications (eg, changes to                          | <b>modifications will be made.</b> |
| 49 |                   | eligibility criteria, outcomes, analyses) to                    |                                    |
| 50 |                   | relevant parties (eg, investigators, REC /                      |                                    |
| 51 |                   | IRBs, trial participants, trial registries,                     |                                    |
| 52 |                   | journals, regulators)                                           |                                    |
| 53 |                   |                                                                 |                                    |
| 54 |                   |                                                                 |                                    |
| 55 |                   |                                                                 |                                    |
| 56 |                   |                                                                 |                                    |
| 57 | Consent or assent | <a href="#">#26a</a> Who will obtain informed consent or        | <b>9</b>                           |
| 58 |                   | assent from potential trial participants or                     |                                    |
| 59 |                   |                                                                 |                                    |
| 60 |                   |                                                                 |                                    |

|    |                       |                      |                                                                                                                                            |                               |
|----|-----------------------|----------------------|--------------------------------------------------------------------------------------------------------------------------------------------|-------------------------------|
| 1  |                       |                      | authorised surrogates, and how (see Item                                                                                                   |                               |
| 2  |                       |                      | 32)                                                                                                                                        |                               |
| 3  |                       |                      |                                                                                                                                            |                               |
| 4  | Consent or            | <a href="#">#26b</a> | Additional consent provisions for                                                                                                          | <b>NA</b>                     |
| 5  | assent: ancillary     |                      | collection and use of participant data and                                                                                                 |                               |
| 6  | studies               |                      | biological specimens in ancillary studies,                                                                                                 |                               |
| 7  |                       |                      | if applicable                                                                                                                              |                               |
| 8  |                       |                      |                                                                                                                                            |                               |
| 9  |                       |                      |                                                                                                                                            |                               |
| 10 | Confidentiality       | <a href="#">#27</a>  | How personal information about potential                                                                                                   | <b>16</b>                     |
| 11 |                       |                      | and enrolled participants will be collected,                                                                                               |                               |
| 12 |                       |                      | shared, and maintained in order to                                                                                                         |                               |
| 13 |                       |                      | protect confidentiality before, during, and                                                                                                |                               |
| 14 |                       |                      | after the trial                                                                                                                            |                               |
| 15 |                       |                      |                                                                                                                                            |                               |
| 16 |                       |                      |                                                                                                                                            |                               |
| 17 |                       |                      |                                                                                                                                            |                               |
| 18 |                       |                      |                                                                                                                                            |                               |
| 19 | Declaration of        | <a href="#">#28</a>  | Financial and other competing interests                                                                                                    | <b>1</b>                      |
| 20 | interests             |                      | for principal investigators for the overall                                                                                                |                               |
| 21 |                       |                      | trial and each study site                                                                                                                  |                               |
| 22 |                       |                      |                                                                                                                                            |                               |
| 23 |                       |                      |                                                                                                                                            |                               |
| 24 | Data access           | <a href="#">#29</a>  | Statement of who will have access to the                                                                                                   | <b>16/17</b>                  |
| 25 |                       |                      | final trial dataset, and disclosure of                                                                                                     |                               |
| 26 |                       |                      | contractual agreements that limit such                                                                                                     |                               |
| 27 |                       |                      | access for investigators                                                                                                                   |                               |
| 28 |                       |                      |                                                                                                                                            |                               |
| 29 |                       |                      |                                                                                                                                            |                               |
| 30 |                       |                      |                                                                                                                                            |                               |
| 31 | Ancillary and post    | <a href="#">#30</a>  | Provisions, if any, for ancillary and post-                                                                                                | <b>NA</b>                     |
| 32 | trial care            |                      | trial care, and for compensation to those                                                                                                  |                               |
| 33 |                       |                      | who suffer harm from trial participation                                                                                                   |                               |
| 34 |                       |                      |                                                                                                                                            |                               |
| 35 |                       |                      |                                                                                                                                            |                               |
| 36 | Dissemination         | <a href="#">#31a</a> | Plans for investigators and sponsor to                                                                                                     | <b>16/17</b>                  |
| 37 | policy: trial results |                      | communicate trial results to participants,                                                                                                 |                               |
| 38 |                       |                      | healthcare professionals, the public, and                                                                                                  |                               |
| 39 |                       |                      | other relevant groups (eg, via publication,                                                                                                |                               |
| 40 |                       |                      | reporting in results databases, or other                                                                                                   |                               |
| 41 |                       |                      | data sharing arrangements), including                                                                                                      |                               |
| 42 |                       |                      | any publication restrictions                                                                                                               |                               |
| 43 |                       |                      |                                                                                                                                            |                               |
| 44 |                       |                      |                                                                                                                                            |                               |
| 45 |                       |                      |                                                                                                                                            |                               |
| 46 |                       |                      |                                                                                                                                            |                               |
| 47 | Dissemination         | <a href="#">#31b</a> | Authorship eligibility guidelines and any                                                                                                  | <b>18</b>                     |
| 48 | policy: authorship    |                      | intended use of professional writers                                                                                                       |                               |
| 49 |                       |                      |                                                                                                                                            |                               |
| 50 |                       |                      |                                                                                                                                            |                               |
| 51 | Dissemination         | <a href="#">#31c</a> | Plans, if any, for granting public access to                                                                                               | <b>17</b>                     |
| 52 | policy:               |                      | the full protocol, participant-level dataset,                                                                                              |                               |
| 53 | reproducible          |                      | and statistical code                                                                                                                       |                               |
| 54 | research              |                      |                                                                                                                                            |                               |
| 55 |                       |                      |                                                                                                                                            |                               |
| 56 |                       |                      |                                                                                                                                            |                               |
| 57 |                       |                      |                                                                                                                                            |                               |
| 58 | Informed consent      | <a href="#">#32</a>  | Model consent form and other related                                                                                                       | <b>Supplementary material</b> |
| 59 |                       |                      |                                                                                                                                            |                               |
| 60 |                       |                      | For peer review only - <a href="http://bmjopen.bmj.com/site/about/guidelines.xhtml">http://bmjopen.bmj.com/site/about/guidelines.xhtml</a> |                               |

|    |            |                                                                   |
|----|------------|-------------------------------------------------------------------|
| 1  | materials  | documentation given to participants and                           |
| 2  |            | authorised surrogates                                             |
| 3  |            |                                                                   |
| 4  | Biological | <u>#33</u> Plans for collection, laboratory evaluation, <b>NA</b> |
| 5  | specimens  | and storage of biological specimens for                           |
| 6  |            | genetic or molecular analysis in the                              |
| 7  |            | current trial and for future use in ancillary                     |
| 8  |            | studies, if applicable                                            |
| 9  |            |                                                                   |
| 10 |            |                                                                   |
| 11 |            |                                                                   |

12 The SPIRIT checklist is distributed under the terms of the Creative Commons Attribution License CC-  
13 BY-ND 3.0. This checklist can be completed online using <https://www.goodreports.org/>, a tool made  
14 by the [EQUATOR Network](#) in collaboration with [Penelope.ai](#)  
15  
16  
17  
18  
19  
20  
21  
22  
23  
24  
25  
26  
27  
28  
29  
30  
31  
32  
33  
34  
35  
36  
37  
38  
39  
40  
41  
42  
43  
44  
45  
46  
47  
48  
49  
50  
51  
52  
53  
54  
55  
56  
57  
58  
59  
60



**EVALUATING A CUSTOM DESIGNED AID TO IMPROVE  
COMMUNICATION OF GENETIC RESULTS IN FAMILIES WITH  
HYPERTROPHIC CARDIOMYOPATHY: STUDY PROTOCOL FOR  
A RANDOMISED CONTROLLED TRIAL**

|                                 |                                                                                                                                                                                                                                                             |
|---------------------------------|-------------------------------------------------------------------------------------------------------------------------------------------------------------------------------------------------------------------------------------------------------------|
| Journal:                        | <i>BMJ Open</i>                                                                                                                                                                                                                                             |
| Manuscript ID                   | bmjopen-2018-026627.R2                                                                                                                                                                                                                                      |
| Article Type:                   | Protocol                                                                                                                                                                                                                                                    |
| Date Submitted by the Author:   | 06-Dec-2018                                                                                                                                                                                                                                                 |
| Complete List of Authors:       | Burns, Charlotte; Centenary Institute, Molecular Cardiology Program<br>Yeates, Laura; Centenary Institute, Molecular Cardiology Program<br>Semsarian, Christopher; Centenary Institute,<br>Ingles, Jodie; Centenary Institute, Molecular Cardiology Program |
| <b>Primary Subject Heading</b>: | Genetics and genomics                                                                                                                                                                                                                                       |
| Secondary Subject Heading:      | Cardiovascular medicine, Communication                                                                                                                                                                                                                      |
| Keywords:                       | Protocols & guidelines < HEALTH SERVICES ADMINISTRATION & MANAGEMENT, Cardiomyopathy < CARDIOLOGY, Genetics < TROPICAL MEDICINE                                                                                                                             |
|                                 |                                                                                                                                                                                                                                                             |

SCHOLARONE™  
Manuscripts

1  
2  
3  
4  
5  
6  
7  
8  
9  
10  
11  
12  
13  
14  
15  
16  
17  
18  
19  
20  
21  
22  
23  
24  
25  
26  
27  
28  
29  
30  
31  
32  
33  
34  
35  
36  
37  
38  
39  
40  
41  
42  
43  
44  
45  
46  
47  
48  
49  
50  
51  
52  
53  
54  
55  
56  
57  
58  
59  
60

# EVALUATING A CUSTOM DESIGNED AID TO IMPROVE COMMUNICATION OF GENETIC RESULTS IN FAMILIES WITH HYPERTROPHIC CARDIOMYOPATHY: STUDY PROTOCOL FOR A RANDOMISED CONTROLLED TRIAL

Charlotte Burns, MGC MPH,\*†‡ Laura Yeates, GradDipGenCouns,\*‡ Christopher  
Semsarian, MBBS MPH PhD,\*†‡ Jodie Ingles, GradDipGenCouns MPH PhD\*†‡

\*Agnes Ginges Centre for Molecular Cardiology, Centenary Institute, Sydney, Australia;  
†Sydney Medical School, Faculty of Medicine and Health, University of Sydney;  
‡Department of Cardiology, Royal Prince Alfred Hospital, Sydney, Australia.

*Total word count: 3097 (not including abstract or references)*

*Key words: Protocol, randomised controlled trial, hypertrophic cardiomyopathy, genetic testing.*

## **NO DISCLOSURES**

### **Address for Correspondence:**

Doctor Jodie Ingles

Agnes Ginges Centre for Molecular Cardiology

Centenary Institute

Locked Bag 6

Newtown NSW 2042 Australia

Email: [j.ingles@centenary.org.au](mailto:j.ingles@centenary.org.au)

## ABSTRACT

**Introduction:** Genetic testing for hypertrophic cardiomyopathy (HCM) in the era of genomics brings unique challenges for genetic counselling. The number of genes routinely included in an HCM gene panel has increased markedly, many with minimal if any robust evidence of gene-disease association. Subsequently there is a greater chance of uncertain genetic findings. The responsibility of communicating this information with at-risk relatives lies with the index case (proband). We have developed a communication aid to assist with the delivery of genetic results to the proband. We have previously shown the aid is feasible and acceptable, and have now developed a study protocol for a randomised controlled trial of a genetic counsellor-led intervention incorporating the communication aid.

**Methods and Analysis:** This is a prospective randomised controlled trial. We will investigate the impact of a genetic counsellor-led intervention to return proband genetic results using a custom designed communication aid. We aim to improve knowledge and empowerment. The primary outcome of this trial is the ability and confidence of the proband to communicate genetic results to at-risk relatives. Secondary outcomes will assess genetic knowledge, satisfaction with services, outcomes from genetic counselling and psychological adaptation to genetic information.

**Ethics and Dissemination:** This study has been approved by and is in strict accordance with the Sydney Local Health District Ethics Review Committee (X16-0030; 22/01/2016; version 1). Results from this trial will be prepared as a manuscript and submitted to peer-reviewed journals for publication as well as submission for presentation at national and international meetings.

**Registration Details:** This trial is registered with the Australian New Zealand Clinical Trials Registry: ACTRN12617000706370



## STRENGTHS AND LIMITATIONS

- This study will assess the effectiveness of a communication aid to improve the ability and confidence of patients with hypertrophic cardiomyopathy (HCM) to communicate genetic test results with their at-risk relatives.
- The results of this trial will inform genetic counselling practice for HCM genetic testing, as well as be broadly applicable for other inherited heart diseases.
- Limitations include the generalisability of our findings, which are true for a specialised multidisciplinary clinic where the intervention was performed but may not be representative of the broader HCM population undergoing genetic testing.
- As genomic technologies continue to evolve, uncertainty and complexity of genetic findings will likely increase over time.

## INTRODUCTION

### Background and rationale

Genetic testing in the era of genomics brings unique challenges for the genetic counselling of families. Hypertrophic cardiomyopathy (HCM) is a clinically heterogeneous inherited heart disease characterised by unexplained left ventricular hypertrophy in the absence of a loading condition such as hypertension.<sup>1</sup> With a prevalence of 1 in 200-500, it is one of the most common inherited heart diseases and clinical manifestations can range from asymptomatic through to heart failure or sudden cardiac death.<sup>2</sup> In the setting of HCM, genetic testing of the index case (proband) can provide invaluable information by allowing at-risk relatives the opportunity to undergo cascade genetic testing to look for the presence or absence of the family-specific variants.<sup>3</sup> The first step is often the most challenging, requiring identification of a variant for which there is sufficient evidence of causation.

Genetic counselling is a critical aspect of the process, not just for genetic testing, but also for understanding inheritance risks, characterisation of the family history and information and emotional support.<sup>4</sup> Within a clinical setting, pre- and post-test genetic counselling should include discussion of inheritance risks and clinical screening guidelines for at-risk relatives.<sup>5</sup> This allows asymptomatic at-risk relatives to make proactive, informed decisions regarding their risk, including family planning decisions.

How a patient understands and communicates this genetic information to their at-risk relatives is critical to ensuring patients' get the most value out of genetic testing. This task of communication relies on the proband within the family. Current Australian practice and privacy laws dictate that in most cases the health care provider does not make contact with relatives to disclose risk information. Therefore, it follows that in order to communicate genetic results or risk information the proband must have adequate understanding of the

1  
2 information they have received from their healthcare provider. Several studies indicate this  
3  
4 may be problematic, and some individuals may not retain or understand the information  
5  
6 presented to them.<sup>6</sup>  
7  
8  
9

## 10 11 **Existing knowledge**

12  
13 Currently literature estimates between 20-40% of relatives remain unaware of relevant  
14  
15 genetic information and do not act on information even when they have reportedly been  
16  
17 informed of their risk.<sup>7-9</sup> Many factors have been identified which influence family  
18  
19 communication about genetic risk, including complicated family dynamics, guilt, anxiety  
20  
21 and gender, however these factors are difficult to target as areas for improvement within  
22  
23 the context of one or two genetic counselling sessions.<sup>7 8 10 11</sup> There are stages within the  
24  
25 genetic counselling process, where communication of genetic results and uptake of  
26  
27 appropriate screening may be influenced.  
28  
29  
30  
31  
32  
33

34 Our group and others have shown some of the barriers that can negatively impact on  
35  
36 family communication. In a qualitative study of HCM patients undergoing comprehensive  
37  
38 genetic testing, many patients reported uncertain results to be conveyed less amongst  
39  
40 families.<sup>12</sup> Further, these results are often misunderstood. For example, amongst this  
41  
42 cohort, probands with uncertain results perceived these results as falsely reassuring or  
43  
44 conversely suggests their disease is 'worse' or 'different'. This led to a misunderstanding  
45  
46 that their result was not heritable and therefore communication with relatives did not  
47  
48 occur.<sup>12</sup> Supporting these findings, the general genetics literature highlights that risk  
49  
50 perception and understanding of results though varied, can be poor, inaccurate and  
51  
52 incomplete.<sup>13 14</sup>  
53  
54  
55  
56  
57  
58  
59  
60

1  
2 There is evidence for the effectiveness of a genetic counsellor in addressing some of the  
3 communication and knowledge barriers.<sup>15-17</sup> One key area for intervention is during the  
4 post-test genetic counselling session. Genetic and risk information can be difficult to  
5 understand and explain clearly and as a consequence, the patient may not gain sufficient  
6 knowledge and lack confidence to convey these key messages to at-risk relatives.<sup>12</sup>  
7  
8 Further, it is recognised that patients deliberate on the appropriate time to communicate  
9 genetic information and make decisions regarding which relatives the information is  
10 pertinent to, regardless of the recommendation of professionals.<sup>7 18 19</sup> Few resources exist  
11 which aim to facilitate effective communication to at-risk relatives. We therefore  
12 hypothesise that improving knowledge of an HCM genetic diagnosis will have a positive  
13 impact on communication to at-risk relatives, as well as genetic knowledge, satisfaction  
14 with services, outcomes from genetic counselling and psychological adaptation to genetic  
15 information.

### 34 **Utility of a communication aid**

35  
36 When asked about family communication, most patients report families should  
37 communicate risk amongst themselves with varying levels of support from their healthcare  
38 providers.<sup>14 17 20</sup> In addition, there is evidence for the effectiveness of genetic counselling  
39 to assist with this process.<sup>15 16 20</sup> Hodgson et al. published a randomised controlled trial  
40 assessing the impact of a genetic counselling phone intervention on communication of  
41 genetic information within families.<sup>21</sup> They found no significant difference between the  
42 intervention and control group when measuring contact with genetic services, though in  
43 sub-analyses of the high-risk children group, the primary outcome was significantly  
44 improved. Importantly, the primary outcome measure was contact with a genetic service,  
45 which can be difficult to ascertain and may not be the most accurate measure of  
46 effectiveness or a direct reflection of communication efforts.

1  
2 Resources such as decision and communication aids, or family letters, may provide  
3  
4 additional support to this process, though more data is needed regarding efficacy.<sup>15 19 21 22</sup>  
5  
6 Decision or communication aids are tools specifically designed to support patients with  
7  
8 decision making and unmet information needs. There is evidence for the effectiveness of  
9  
10 an aid with regard to improved knowledge and accuracy of risk perceptions.<sup>23-25</sup> Further,  
11  
12 most health information is provided in a written format, which may not be the most  
13  
14 effective health communication method. Communication and decision aids provide a  
15  
16 format to include visual elements that may improve comprehension, recall and comfort  
17  
18 with the information, particularly when health literacy may be an issue.  
19  
20  
21  
22  
23  
24

### 25 **Need for a trial**

26  
27 Overall, the literature highlights that probands require additional support to understand and  
28  
29 communicate genetic results. The rationale for this study is the critical gap in supporting  
30  
31 patients' comprehension and consequent communication of genetic risk to at-risk relatives.  
32  
33 Though genetic counsellors are specifically trained in delivering genetic information,  
34  
35 information needs of patients are not always met and communication amongst at-risk  
36  
37 relatives can be suboptimal. As genetic test results become increasingly complex, an  
38  
39 evidence-based approach to supporting patients with genetic knowledge and risk  
40  
41 communication should be explored.  
42  
43  
44  
45  
46  
47

### 48 **STUDY AIMS AND OUTCOMES**

49  
50 The aim of this randomised controlled trial is to determine if a genetic counsellor-led  
51  
52 intervention using a communication aid for the delivery of HCM genetic test results  
53  
54 improves the ability and confidence of the proband to communicate genetic results to at-  
55  
56 risk relatives compared with current clinical practice.  
57  
58  
59  
60

- 1  
2  
3  
4  
5  
6  
7  
8  
9  
10  
11  
12  
13  
14  
15  
16  
17  
18  
19  
20  
21  
22  
23  
24  
25  
26  
27  
28  
29  
30  
31  
32  
33  
34  
35  
36  
37  
38  
39  
40  
41  
42  
43  
44  
45  
46  
47  
48  
49  
50  
51  
52  
53  
54  
55  
56  
57  
58  
59  
60  
1. The primary outcome is the ability and confidence of the proband to communicate genetic results to at-risk relatives, measured at 2 weeks post-intervention.
2. Secondary outcomes will assess genetic knowledge, satisfaction with services, patient reported outcome of genetic counselling and psychological adaptation to genetic information, measured at 2 weeks post-intervention.
3. As a longer-term outcome, we will systematically assess and document family communication as reported by the proband measured by phone calls at one, three and six monthly intervals. The researcher conducting these phone calls will not be blinded to the treatment arm of the participant. During these phone calls a series of questions regarding family communication and uptake of family screening will be asked of the proband. These phone calls will be conducted and analysed after collection of the primary and secondary outcomes data. This is to prevent interference with results because the phone calls themselves may serve as a family communication intervention. A phone script to be used as a guide for these phone calls is available in the supplementary material.

## **METHODS AND ANALYSIS**

### **Trial design**

This is a prospective randomised controlled trial. The protocol is reported in accordance with the SPIRIT statement, which provides recommendations for a minimum set of scientific, ethical and administrative elements that should be addressed within a clinical trial protocol.<sup>26</sup> All items from the World Health Organization Trial Registration Data Set are listed in Table 1. Consecutive HCM patients will be invited to participate when they are notified on the phone that their genetic result is ready to be returned. Once written consent is obtained they will be randomised to receive their genetic result via the intervention or control arm of the study (Figure 1).

### **Study setting**

This trial will be carried out within a specialised multidisciplinary HCM clinic. This incorporates the expertise of specialist cardiologists and cardiac genetic counsellors.<sup>27</sup> Patients with HCM attending these clinics at Royal Prince Alfred Hospital will be invited to attend.

### **Eligibility criteria**

HCM probands with a genetic result ready for return are eligible. HCM probands are defined as the first person in the family to undergo genetic testing for HCM. Probands include those with and without a family history of disease provided genetic testing has been ordered. Participants must be aged 16 years or older, with sufficient written English skills as nominated by the participant. Genetic testing is performed as part of a research study, or commercial laboratory as previously published.<sup>28 29</sup> All identified variants are classified in the same manner, as per current clinical standards and guidelines.<sup>30</sup> Recruitment commenced in November 2017 and is expected to end in November 2018.

1  
2 Participants will be invited to participate in the study during their routine pre clinic phone  
3  
4 call conducted as normal clinical process. Informed consent will be obtained by the cardiac  
5  
6 genetic counsellor present at the participants clinic consultation (supplementary material).  
7  
8  
9

## 10 11 **Randomisation**

12  
13 A randomised list was prepared using the Excel (Microsoft Office) "Random" function and  
14  
15 study participants who consent to the study are allocated the next number on the random  
16  
17 list. This number is linked to either control or intervention. A researcher not involved in the  
18  
19 study performs the randomisation.  
20  
21  
22  
23

## 24 25 **Sample size and power calculations**

26  
27 Prior to commencement of the study, power calculations were performed using the results  
28  
29 from our published feasibility study.<sup>31</sup> The primary outcome of this trial is the ability and  
30  
31 confidence of the proband to communicate genetic results to at-risk relatives. Data from  
32  
33 the feasibility study indicated 75% of participants communicated genetic results to at-risk  
34  
35 relatives. Assuming the control group communicates in 50% of cases, at a significance  
36  
37 level of 5% and 80% statistical power, a sample size of n=21 is required per group.  
38  
39  
40  
41  
42

## 43 44 **Development of the custom communication aid**

45  
46 We have developed a communication aid to assist with the delivery of genetic results to  
47  
48 the proband and support family communication. A pilot study demonstrating feasibility and  
49  
50 acceptability of this aid has been previously reported.<sup>31</sup> In brief, development of the aid  
51  
52 involved review of the literature alongside multidisciplinary meetings. Development was a  
53  
54 multistep process and on the basis of meeting outcomes, literature review and empirical  
55  
56 evidence from the multidisciplinary team. The aid addresses:  
57  
58

- 59 1. Genetic test basic background information
- 60



- 1
  - 2
  - 3
  - 4
  - 5
  - 6
  - 7
  - 8
  - 9
  - 10
  - 11
  - 12
  - 13
  - 14
  - 15
  - 16
  - 17
  - 18
  - 19
  - 20
  - 21
  - 22
  - 23
  - 24
  - 25
  - 26
  - 27
  - 28
  - 29
  - 30
  - 31
  - 32
  - 33
  - 34
  - 35
  - 36
  - 37
  - 38
  - 39
  - 40
  - 41
  - 42
  - 43
  - 44
  - 45
  - 46
  - 47
  - 48
  - 49
  - 50
  - 51
  - 52
  - 53
  - 54
  - 55
  - 56
  - 57
  - 58
  - 59
  - 60
2. Possible outcomes of genetic testing
  3. Overview of the process involved in classification of a genetic variant
  4. Implications for at-risk relatives including family screening recommendations

### **Control arm**

Those within the control arm of the study will receive their result via normal clinical practice. There are currently no evidence-based guidelines for return of comprehensive genetic test results within the multidisciplinary clinic setting. Normal clinical practice typically involves return of a genetic result either by the cardiologist or genetic counsellor. Return of the result is usually performed following clinical cardiology review, which is often the primary purpose of the consult. In the majority of cases a genetic counsellor is present.

### **Intervention arm**

Those randomised to the intervention arm will be allocated a separate appointment time after clinical review with their cardiologist, where they will see the cardiac genetic counsellor who will return their genetic result using the communication aid.

The communication aid covers the process of genetic testing and risk from diagnosis of HCM through to the implications of a genetic result for at-risk relatives (Figure 2). There is a section in the aid under 'Results', which goes through the meaning of each category of genetic result. These include an indeterminate result (no variant identified), a variant of uncertain significance and a likely pathogenic/pathogenic result (Figure 3). The genetic counsellor returning the genetic result will mark the appropriate category of result, which applies to the patient in front of them. The genetic counsellor will return the genetic result, and then go through the communication aid, referencing the individual result and specific recommendations for the rest of the family. There will be an opportunity to ask questions,

1  
2 and the genetic counsellor will write the specific recommendations for each family member  
3  
4 in the box provided at the end of the communication aid (Figure 4).  
5  
6  
7

## 8 **Patient and Public Involvement**

9  
10  
11 Development of this research question and outcome measures were informed by clinical  
12  
13 experience of the authors in a specialised clinic setting, as well as published research  
14  
15 identifying gaps in communication with relatives. Specifically, there are known challenges  
16  
17 associated with understanding and subsequent communication of genetic information to  
18  
19 relatives. We have shown poor understanding, recall, and communication of genetic  
20  
21 results amongst HCM probands.<sup>7 12</sup> Prior to implementation and development of this trial, a  
22  
23 pilot study involving patients was conducted, incorporating patient preference and needs  
24  
25 allowing development of both the communication aid and the study protocol.<sup>31</sup> Results will  
26  
27 be disseminated to patients in the form of a research participant newsletter on completion  
28  
29 of the study. In addition, those randomised to the control arm will receive a copy of the  
30  
31 communication aid. Patients provided written consent to participate in the study, with an  
32  
33 understanding of the requirements of the study. These were not considered by the patients  
34  
35 or study team to be burdensome for the patients participating in the study.  
36  
37  
38  
39  
40  
41  
42

## 43 **DATA COLLECTION AND OUTCOMES**

44  
45 Both the primary and secondary outcomes will be measured at a single time point (2-  
46  
47 weeks post intervention) using a survey comprised of a number of previously published  
48  
49 and validated scales. A number of demographic questions will also be asked within the  
50  
51 survey. The survey will be available online via qualtrics (<https://www.qualtrics.com/>) with a  
52  
53 direct link sent to participants. For those who prefer a hard copy it will be posted with a  
54  
55 return envelope. The survey will be sent two weeks after return of genetic results.  
56  
57  
58  
59 Evidence regarding the most appropriate time between genetic result disclosure and family  
60

1  
2 communication is lacking. However, given the risk of arrhythmia and sudden death within  
3  
4 the inherited heart disease context, two weeks post result disclosure was considered by  
5  
6 the study team to be an appropriate time point to send the survey.<sup>25</sup> Return of the survey  
7  
8 is followed up on a fortnightly basis.  
9

### 10 11 12 13 **Primary outcome** 14

15  
16 The primary outcome of this trial is the ability and confidence of the proband to  
17  
18 communicate genetic results to at-risk relatives. This will be measured at a single time  
19  
20 point, administered two weeks after return of genetic results. Ability and confidence will be  
21  
22 assessed by two measures and then combined into a binary outcome. The certainty sub-  
23  
24 scale of the Psychological Adaptation to Genetic Information (PAGIS) scale will measure  
25  
26 confidence with genetic knowledge.<sup>32</sup> This sub-scale measures the patients' perception  
27  
28 and confidence in their genetic knowledge and the items from this sub-scale are listed in  
29  
30 Table 2. Subsequent ability to pass this information on will be measured by the number of  
31  
32 at-risk relatives informed of genetic results by the proband. We will average the scores  
33  
34 from both measures to determine a final score. The calculations used to determine this  
35  
36 cut-off are illustrated in Table 3.  
37  
38  
39  
40  
41  
42

43  
44 In summary, we will calculate the total PAGIS certainty sub-scale score (denominator of  
45  
46 36). This will be added to the total number of relatives informed over the total number of  
47  
48 relatives at risk. This number will then be converted to a percentage. The final score will be  
49  
50 converted to a binary outcome of fair versus poor ability and confidence to communicate  
51  
52 genetic results to at-risk relatives. A cut-off of  $\geq 75\%$  will be used to indicate fair  
53  
54 communication, based on data indicating 20-40% of relatives are not informed of their  
55  
56 genetic risk. This outcome has been specifically designed for this study.  
57  
58  
59  
60

1  
2 Factors that influence communication of genetic results to at-risk relatives are  
3 multidimensional. For this reason, we chose this combination approach to more broadly  
4 reflect the communication process. Many studies rely on single and linear measures of  
5 communication such as contact by relatives with genetics departments or self reported  
6 communication with at-risk relatives only. To overcome this, we aimed to incorporate a  
7 multidimensional approach that included the probands confidence regarding their  
8 knowledge of genetics alongside the action linked to this knowledge, being the  
9 communication to relatives. This will aim to determine consistency between the probands  
10 confidence with genetic information against their self-reported percentage of immediate  
11 family members informed  
12  
13  
14  
15  
16  
17  
18  
19  
20  
21  
22  
23

24  
25  
26  
27 The certainty sub-scale of the Psychological Adaptation to Genetic Information Scale  
28 (PAGIS) will be used to measure confidence with genetic knowledge as described  
29 above.<sup>32</sup> Guided by grounded theory in patient perspectives of genetic counselling and the  
30 Roy Adaptation to Genetic Information Model, the 26-item PAGIS scale allows for  
31 evaluation of the efficacy of genetic counselling.<sup>32 33</sup> The scale aims to incorporate the  
32 multidimensional adaptation to genetic information and comprises of five domains which  
33 include; a) non-intrusiveness, b) support c) self-worth, d) certainty and e) self-efficacy.<sup>32</sup>  
34  
35  
36  
37  
38  
39  
40  
41  
42  
43  
44  
45  
46  
47  
48  
49  
50  
51  
52  
53  
54  
55  
56  
57  
58  
59  
60

### **Secondary outcomes**

The survey comprises three additional scales to assess primary and secondary outcomes, a number of questions regarding communication with relatives, as well as a number of demographic questions.

1  
2 Genetic knowledge will be assessed using an amended version of the Breast Cancer  
3  
4 Genetic Counseling Knowledge Questionnaire (BGKQ).<sup>33 34</sup> This scale was originally  
5  
6 developed to assess knowledge of information typically included in genetic counselling for  
7  
8 breast cancer. The original scale was a 27 item questionnaire including statements  
9  
10 regarding genetics such as '*50% (half) of your genetic information was passed down from*  
11  
12 *your mother*' and participants were asked if the statement was true or false. Items in the  
13  
14 original scale were empirically derived from detailed content analysis of breast cancer  
15  
16 genetic counselling sessions. The original scale demonstrated a high content validity with  
17  
18 cronbachs  $\alpha = 0.92$ , with demonstrated ability to discriminate between patients before and  
19  
20 after genetic counselling sessions.<sup>34</sup> We have amended questions to reflect the HCM  
21  
22 context and 10 items were included.  
23  
24  
25  
26  
27  
28

29 Satisfaction with services received will be assessed using the widely used Satisfaction with  
30  
31 Genetic Counseling Scale (SGCS).<sup>35</sup> The original questionnaire was designed to assess  
32  
33 three dimensions of patient satisfaction: instrumental, affective and procedural.<sup>33 35</sup> This  
34  
35 survey will use an amended version of the 12 item short form of the survey.  
36  
37  
38  
39  
40

41 The genetic counselling outcome scale (GCOS-24) will be used to assess patient reported  
42  
43 outcomes of genetic counselling.<sup>36</sup> The questionnaire was designed to be used pre and  
44  
45 post genetic counselling, though we have used it in the post counselling setting. The  
46  
47 authors of this scale used the construct of empowerment to summarise the patient derived  
48  
49 benefits from genetic counselling.  
50  
51  
52  
53  
54

## 55 **Data management**

56  
57 All data from the survey will be entered into Microsoft Excel. Patient identifiers will be  
58  
59 removed with study codes allocated. The primary researcher will be blinded to treatment  
60

1  
2 arm of the patient for analysis of the primary and secondary outcome data. A second  
3  
4 senior researcher and supervisor will oversee data storage and analysis. Data will be  
5  
6 stored in accordance with the Sydney Local Health District Ethics Review Committee and  
7  
8 Centenary Institute.  
9

### 10 11 12 13 **Data analysis plan** 14

15  
16 Data will be analysed using Prism (version 7.0) and SPSS (Version 23.0). We will compare  
17  
18 the primary outcome as a binary measure between the intervention and control group. We  
19  
20 will use chi-square analyses using  $p < 0.05$  for statistical significance. For assessment of  
21  
22 secondary outcomes we will be guided by published scoring systems for the validated  
23  
24 scales to score genetics knowledge, satisfaction with services and genetic counselling  
25  
26 outcomes. Mean scores for each scale will be compared between the intervention and  
27  
28 control group and comparisons between the control and intervention group will be  
29  
30 analysed using unpaired t-tests for continuous data and chi-square analysis for categorical  
31  
32 data. Sub-group analysis will also be performed; specifically we will compare outcomes in  
33  
34 the study groups stratified by the genetic result (i.e. causative, uncertain or indeterminate  
35  
36 results) and compare familial and non-familial HCM probands, which has been previously  
37  
38 shown to influence family communication practices.<sup>37</sup>  
39  
40  
41  
42  
43  
44

45  
46 As a longer-term outcome, we will systematically assess and document family  
47  
48 communication as reported by the proband measured by phone calls at one, three and six  
49  
50 monthly intervals. These phone calls will also measure uptake of family screening as  
51  
52 reported by the proband. This will be assessed separately to the primary and secondary  
53  
54 outcomes. We will compare outcomes between the study groups stratified by the genetic  
55  
56 result (i.e. causative, uncertain or indeterminate results). In addition, we will compare  
57  
58  
59  
60

1  
2 outcomes between study groups stratified by those with and without a family history of  
3  
4 HCM.  
5  
6  
7

## 8 **ETHICS AND DISSEMINATION**

### 10 **Ethics**

11  
12 All aspects of the study will be performed according to institutional human research ethics  
13  
14 committee approval. This study has been approved by and is in strict accordance with the  
15  
16 Sydney Local Health District Ethics Review Committee (X16-0030).  
17  
18  
19  
20  
21

### 22 **Dissemination**

23  
24 Results from this trial will be prepared as a manuscript and submitted to peer-reviewed  
25  
26 journals for publication. In addition, it will form part of the first authors' PhD thesis. Results  
27  
28 from the study will be submitted to international and national scientific sessions with the  
29  
30 aim of being presented. We will make a copy of the aid available to a wider genetic  
31  
32 audience for use in their clinical practice and study data will be available from the authors.  
33  
34  
35 This will include development of an electronic form of the aid.  
36  
37  
38  
39  
40  
41  
42  
43  
44  
45  
46  
47  
48  
49  
50  
51  
52  
53  
54  
55  
56  
57  
58  
59  
60

## ACKNOWLEDGEMENTS AND FUNDING

CB is the recipient of an Australia Postgraduate Award (APA). CS is the recipient of a National Health and Medical Research Council (NHMRC) Practitioner Fellowship (#1059156). JI is the recipient of a National Heart Foundation of Australia Future Leader Fellowship (#100833).

We thank Yana Smagarinsky for her assistance with developing the communication aid and Katharine Morgan for graphic design of the communication aid.

## AUTHOR STATEMENT

All authors contributed to the manuscript, specifically:

- (1) Substantial contributions to the conception or design of the work; or the acquisition, analysis, or interpretation of data for the work (CB, LY, CS, JI); AND
- (2) Drafting the work or revising it critically for important intellectual content (CB, LY, CS, JI); AND
- (3) Final approval of the version to be published (CB, LY, CS, JI); AND
- (4) Agreement to be accountable for all aspects of the work in ensuring that questions related to the accuracy or integrity of any part of the work are appropriately investigated and resolved (CB, LY, CS, JI).

## COMPETING INTERESTS

**All authors declare they have no disclosures regarding competing interests.**



**REFERENCES**

1. Maron BJ, Maron MS, Semsarian C. Genetics of hypertrophic cardiomyopathy after 20 years: clinical perspectives. *Journal of the American College of Cardiology* 2012;60(8):705-15. doi: 10.1016/j.jacc.2012.02.068
2. Semsarian C, Ingles J, Maron MS, et al. New perspectives on the prevalence of hypertrophic cardiomyopathy. *J Am Coll Cardiol* 2015;65(12):1249-54. doi: 10.1016/j.jacc.2015.01.019
3. Ingles J, Burns C, Barratt A, et al. Application of Genetic Testing in Hypertrophic Cardiomyopathy for Preclinical Disease Detection. *Circ Cardiovasc Genet* 2015;8(6):852-9. doi: 10.1161/CIRCGENETICS.115.001093
4. National Society of Genetic Counselors' Definition Task F, Resta R, Biesecker BB, et al. A new definition of Genetic Counseling: National Society of Genetic Counselors' Task Force report. *Journal of genetic counseling* 2006;15(2):77-83. doi: 10.1007/s10897-005-9014-3
5. Semsarian C, Ingles J. A clinical approach to genetic testing for non-specialists. *Bmj* 2017;358:j4101. doi: 10.1136/bmj.j4101
6. Burns C, James C, Ingles J. Communication of genetic information to families with inherited rhythm disorders. *Heart rhythm* 2018;15(5):780-86. doi: 10.1016/j.hrthm.2017.11.024
7. Burns C, McGaughran J, Davis A, et al. Factors influencing uptake of familial long QT syndrome genetic testing. *Am J Med Genet A* 2016;170A(2):418-25. doi: 10.1002/ajmg.a.37455
8. Christiaans I, Birnie E, Bonsel GJ, et al. Uptake of genetic counselling and predictive DNA testing in hypertrophic cardiomyopathy. *Eur J Hum Genet* 2008;16(10):1201-7. doi: ejhg200892 [pii] 10.1038/ejhg.2008.92 [published Online First: 2008/05/15]
9. Gaff CL, Clarke AJ, Atkinson P, et al. Process and outcome in communication of genetic information within families: a systematic review. *European journal of human genetics : EJHG* 2007;15(10):999-1011. doi: 10.1038/sj.ejhg.5201883
10. Claes E, Evers-Kiebooms G, Boogaerts A, et al. Communication with close and distant relatives in the context of genetic testing for hereditary breast and ovarian cancer in cancer patients. *American journal of medical genetics Part A* 2003;116A(1):11-9. doi: 10.1002/ajmg.a.10868
11. Barsevick AM, Montgomery SV, Ruth K, et al. Intention to communicate BRCA1/BRCA2 genetic test results to the family. *Journal of family psychology : JFP : journal of the Division of Family Psychology of the American Psychological Association* 2008;22(2):303-12. doi: 10.1037/0893-3200.22.2.303
12. Burns C, Yeates L, Spinks C, et al. Attitudes, knowledge and consequences of uncertain genetic findings in hypertrophic cardiomyopathy. *Eur J Hum Genet* 2017;25(7):809-15. doi: 10.1038/ejhg.2017.66

13. Patenaude AF, Tung N, Ryan PD, et al. Young adult daughters of BRCA1/2 positive mothers: what do they know about hereditary cancer and how much do they worry? *Psycho-oncology* 2013;22(9):2024-31. doi: 10.1002/pon.3257
14. Young AL, Butow PN, Vetsch J, et al. Family Communication, Risk Perception and Cancer Knowledge of Young Adults from BRCA1/2 Families: a Systematic Review. *Journal of genetic counseling* 2017;26(6):1179-96. doi: 10.1007/s10897-017-0125-4
15. Forrest LE, Burke J, Bacic S, et al. Increased genetic counseling support improves communication of genetic information in families. *Genetics in medicine : official journal of the American College of Medical Genetics* 2008;10(3):167-72. doi: 10.1097/GIM.0b013e318164540b
16. Fiallos K, Applegate C, Mathews DJ, et al. Choices for return of primary and secondary genomic research results of 790 members of families with Mendelian disease. *European journal of human genetics : EJHG* 2017;25(5):530-37. doi: 10.1038/ejhg.2017.21
17. Forrest K, Simpson SA, Wilson BJ, et al. To tell or not to tell: barriers and facilitators in family communication about genetic risk. *Clinical genetics* 2003;64(4):317-26.
18. Montgomery SV, Barsevick AM, Egleston BL, et al. Preparing individuals to communicate genetic test results to their relatives: report of a randomized control trial. *Fam Cancer* 2013;12(3):537-46. doi: 10.1007/s10689-013-9609-z
19. Seymour KC, Addington-Hall J, Lucassen AM, et al. What Facilitates or Impedes Family Communication Following Genetic Testing for Cancer Risk? A Systematic Review and Meta-Synthesis of Primary Qualitative Research. *Journal of genetic counseling* 2010;19(4):330-42. doi: 10.1007/s10897-010-9296-y
20. Healey E, Taylor N, Greening S, et al. Quantifying family dissemination and identifying barriers to communication of risk information in Australian BRCA families. *Genetics in medicine : official journal of the American College of Medical Genetics* 2017;19(12):1323-31. doi: 10.1038/gim.2017.52
21. Hodgson J, Metcalfe S, Gaff C, et al. Outcomes of a randomised controlled trial of a complex genetic counselling intervention to improve family communication. *European journal of human genetics : EJHG* 2016;24(3):356-60. doi: 10.1038/ejhg.2015.122
22. Suthers GK, Armstrong J, McCormack J, et al. Letting the family know: balancing ethics and effectiveness when notifying relatives about genetic testing for a familial disorder. *Journal of medical genetics* 2006;43(8):665-70. doi: 10.1136/jmg.2005.039172
23. Stacey D, Legare F, Lewis K, et al. Decision aids for people facing health treatment or screening decisions. *Cochrane Db Syst Rev* 2017(4) doi: Artn Cd001431 10.1002/14651858.Cd001431.Pub5
24. Wakefield CE, Meiser B, Homewood J, et al. Development and pilot testing of two decision aids for individuals considering genetic testing for cancer risk. *Journal of genetic counseling* 2007;16(3):325-39. doi: 10.1007/s10897-006-9068-x
25. Vavolizza RD, Kalia I, Aaron KE, et al. Disclosing Genetic Information to Family Members About Inherited Cardiac Arrhythmias: An Obligation or a Choice? *Journal of genetic counseling* 2015;24(4):608-15. doi: 10.1007/s10897-014-9783-7

- 1  
2 26. Chan AW, Tetzlaff JM, Altman DG, et al. SPIRIT 2013 statement: defining standard  
3 protocol items for clinical trials. *Annals of internal medicine* 2013;158(3):200-7. doi:  
4 10.7326/0003-4819-158-3-201302050-00583  
5
- 6 27. Ingles J, Lind JM, Phongsavan P, et al. Psychosocial impact of specialized cardiac  
7 genetic clinics for hypertrophic cardiomyopathy. *Genet Med* 2008;10(2):117-20. doi:  
8 10.1097/GIM.0b013e3181612cc7  
9 00125817-200802000-00007 [pii] [published Online First: 2008/02/19]  
10
- 11 28. Bagnall RD, Weintraub RG, Ingles J, et al. A Prospective Study of Sudden Cardiac  
12 Death among Children and Young Adults. *New Engl J Med* 2016;374(25):2441-52. doi:  
13 10.1056/NEJMoa1510687  
14  
15
- 16 29. Burns C, Bagnall RD, Lam L, et al. Multiple Gene Variants in Hypertrophic  
17 Cardiomyopathy in the Era of Next-Generation Sequencing. *Circ Cardiovasc Genet*  
18 2017;10(4) doi: 10.1161/CIRCGENETICS.116.001666  
19
- 20 30. Richards S, Aziz N, Bale S, et al. Standards and guidelines for the interpretation of  
21 sequence variants: a joint consensus recommendation of the American College of Medical  
22 Genetics and Genomics and the Association for Molecular Pathology. *Genetics in*  
23 *Medicine* 2015;17(5):405-24. doi: 10.1038/gim.2015.30  
24  
25
- 26 31. Smagarinsky Y, Burns C, Spinks C, et al. Development of a communication aid for  
27 explaining hypertrophic cardiomyopathy genetic test results. *Pilot Feasibility Stud*  
28 2017;3:53. doi: 10.1186/s40814-017-0205-0  
29
- 30 32. Read CY, Perry DJ, Duffy ME. Design and psychometric evaluation of the  
31 Psychological Adaptation to Genetic Information Scale. *J Nurs Scholarsh* 2005;37(3):203-  
32 8.  
33  
34
- 35 33. Kasparian NA, Wakefield CE, Meiser B. Assessment of psychosocial outcomes in  
36 genetic counseling research: an overview of available measurement scales. *Journal of*  
37 *genetic counseling* 2007;16(6):693-712. doi: 10.1007/s10897-007-9111-6 [published  
38 Online First: 2007/08/19]  
39
- 40 34. Erlich J, Brown K, Kim YM, et al. Development and validation of a breast cancer  
41 genetic counseling knowledge questionnaire. *Patient Educ Couns* 2005;56(2):182-91. doi:  
42 10.1016/j.pec.2004.02.007  
43  
44
- 45 35. Shiloh S, Avdor O, Goodman RM. Satisfaction with genetic counseling: dimensions  
46 and measurement. *American journal of medical genetics* 1990;37(4):522-9. doi:  
47 10.1002/ajmg.1320370419 [published Online First: 1990/12/01]  
48
- 49 36. McAllister M, Wood AM, Dunn G, et al. The Genetic Counseling Outcome Scale: a new  
50 patient-reported outcome measure for clinical genetics services. *Clinical genetics*  
51 2011;79(5):413-24. doi: 10.1111/j.1399-0004.2011.01636.x [published Online First:  
52 2011/01/25]  
53  
54
- 55 37. Ko C, Arscott P, Concannon M, et al. Genetic testing impacts the utility of prospective  
56 familial screening in hypertrophic cardiomyopathy through identification of a nonfamilial  
57 subgroup. *Genet Med* 2017 doi: 10.1038/gim.2017.79  
58  
59  
60

**Table 1: Trial Registration Data**

|                                               |                                                                                                                                                                         |
|-----------------------------------------------|-------------------------------------------------------------------------------------------------------------------------------------------------------------------------|
| Primary registry and trial identifying number | Australian New Zealand Clinical Trials Registry:<br>ACTRN12617000706370                                                                                                 |
| Date of registration in primary registry      | 17/05/2017                                                                                                                                                              |
| Secondary identifying numbers                 | NA                                                                                                                                                                      |
| Source(s) of monetary or material support     | National Heart Foundation of Australia                                                                                                                                  |
| Primary sponsor                               | The University of Sydney                                                                                                                                                |
| Secondary sponsor                             | NA                                                                                                                                                                      |
| Contact for public queries                    | Dr Jodie Ingles<br><a href="mailto:j.ingles@centenary.org.au">j.ingles@centenary.org.au</a>                                                                             |
| Contact for scientific queries                | Dr Jodie Ingles<br><a href="mailto:j.ingles@centenary.org.au">j.ingles@centenary.org.au</a>                                                                             |
| Public title                                  | Use of an aid to improve communication of genetic risk information to families with hypertrophic cardiomyopathy (HCM)                                                   |
| Scientific title                              | Use of a custom designed aid to improve communication of genetic results in families with HCM                                                                           |
| Countries of recruitment                      | Australia                                                                                                                                                               |
| Health condition (s) or problem (s) studied   | HCM                                                                                                                                                                     |
| Intervention                                  | Use of a custom designed aid to communicate HCM genetic test results                                                                                                    |
| Key inclusion and exclusion criteria          | HCM probands with a genetic result ready for return<br>Participants must be aged 18 years or older<br>Sufficient written English skills as nominated by the participant |
| Study type                                    | Prospective randomised controlled trial                                                                                                                                 |
| Date of first enrolment                       | 25/11/2016                                                                                                                                                              |
| Target sample size                            | 45                                                                                                                                                                      |
| Recruitment status                            | Recruiting                                                                                                                                                              |
| Primary outcome (s)                           | Ability and confidence of the proband to communicate genetic results to at-risk relatives                                                                               |
| Key secondary outcomes                        | Secondary outcomes will assess genetic knowledge, satisfaction with services, outcomes from genetic counselling and psychological adaptation to genetic information     |

1  
2  
3  
4  
5  
6  
7  
8  
9  
10  
11  
12  
13  
14  
15  
16  
17  
18  
19  
20  
21  
22  
23  
24  
25  
26  
27  
28  
29  
30  
31  
32  
33  
34  
35  
36  
37  
38  
39  
40  
41  
42  
43  
44  
45  
46  
47  
48  
49  
50  
51  
52  
53  
54  
55  
56  
57  
58  
59  
60

---

**Table 2: Certainty sub-scale of the PAGIS scale**

---

1. I understand how I came to have hypertrophic cardiomyopathy
  2. I understand the health risks my relatives face because of hypertrophic cardiomyopathy
  3. I feel certain that I understand the meaning of having hypertrophic cardiomyopathy
  4. I understand the chances I have of passing hypertrophic cardiomyopathy along to my children
  5. I feel that I can explain to other people what having hypertrophic cardiomyopathy means
  6. I feel confused because I have been given different explanations of what having hypertrophic cardiomyopathy means
- 

Abbreviations: PAGIS = Psychological Adaptation to Genetic Information Scale.

---

**Table 3: Primary outcome measure converted to a primary outcome**

---

Measures incorporated

1. Certainty sub scale from PAGIS (measuring confidence)
2. Adult first degree relatives informed of genetic risk (measuring ability)

### Calculation examples

#### Example 1:

Certainty score from PAGIS sub scale =  $18/36 = 0.5$

Relatives informed of risk =  $3/6 = 0.5$

=  $(0.5 + 0.5 = 1) / 2 = 0.5$

= 50%

Therefore this participant falls into the 'poor communication' category of the primary outcome

#### Example 2:

Certainty score from PAGIS sub scale =  $30/36 = 0.83$

Relatives informed of risk =  $7/8 = 0.88$

$(0.88 + 0.83) / 2 = 0.86$

= 86%

Therefore this participant falls into the 'fair communication' category of this primary outcome

---

Abbreviations: PAGIS = Psychological Adaptation to Genetic Information Scale.

1  
2  
3  
4  
5  
6  
7  
8  
9  
10  
11  
12  
13  
14  
15  
16  
17  
18  
19  
20  
21  
22  
23  
24  
25  
26  
27  
28  
29  
30  
31  
32  
33  
34  
35  
36  
37  
38  
39  
40  
41  
42  
43  
44  
45  
46  
47  
48  
49  
50  
51  
52  
53  
54  
55  
56  
57  
58  
59  
60

**FIGURE LEGENDS**

**FIGURE 1:** Flow chart of overall study design

**FIGURE 2:** Example page from communication aid: Genetic testing step by step

**FIGURE 3:** Example page from communication aid: What is my genetic result?

**FIGURE 4:** Example page from communication aid: Family-screening guidelines

For peer review only



Figure 1

297x209mm (300 x 300 DPI)





Figure 2

209x296mm (300 x 300 DPI)

# What is my genetic result?

| Test Result                                               | The Impact for You                                                                                           | The Impact for Your Family                                                                                      |
|-----------------------------------------------------------|--------------------------------------------------------------------------------------------------------------|-----------------------------------------------------------------------------------------------------------------|
| <b>Pathogenic</b><br>(page 18)                            | This result is considered to be the definite cause of your disease.                                          | We can look for the same variant in family members (cascade genetic testing).                                   |
| <b>Likely (probably) pathogenic</b><br>(page 18)          | This result is considered to be important and with the available evidence is thought to be the cause of HCM. | We can look for the same variant in family members (cascade genetic testing).                                   |
| <b>Variant of unknown significance (VUS)</b><br>(page 20) | Currently we do not know if this variant is the cause of HCM or not. More evidence is needed.                | Continue with current clinical screening guidelines, no cascade genetic testing options available at this time. |
| <b>Benign or likely benign</b><br>(page 16)               | This variant is not the cause of HCM.                                                                        | Continue with current clinical screening guidelines, no cascade genetic testing options available at this time. |
| <b>No variant identified (indeterminate)</b><br>(page 15) | No HCM variants have been identified.                                                                        | Continue with current clinical screening guidelines, no cascade genetic testing options available at this time. |



How certain are we that a variant is the cause of HCM?



Figure 3

374x197mm (300 x 300 DPI)

1  
2  
3  
4  
5  
6  
7  
8  
9  
10  
11  
12  
13  
14  
15  
16  
17  
18  
19  
20  
21  
22  
23  
24  
25  
26  
27  
28  
29  
30  
31  
32  
33  
34  
35  
36  
37  
38  
39  
40  
41  
42  
43  
44  
45  
46  
47  
48  
49  
50  
51  
52  
53  
54  
55  
56  
57  
58  
59  
60

# My family summary

Sharing this booklet with family members is encouraged.

If you're a family member reading this booklet, hopefully you will find some details below that apply directly to you.

All first-degree relatives of someone with HCM are recommended to have clinical screening to check for signs of HCM. This includes children, brothers/sisters and parents.

Clinical screening involves: echocardiogram (ultrasound of the heart) electrocardiogram (or ECG, an electrical trace of the heart rhythm), and physical examination with a cardiologist.

| First name | Relation | Age | Clinical Screening | Genetic testing possibilities |
|------------|----------|-----|--------------------|-------------------------------|
|            |          |     |                    |                               |
|            |          |     |                    |                               |
|            |          |     |                    |                               |
|            |          |     |                    |                               |
|            |          |     |                    |                               |
|            |          |     |                    |                               |
|            |          |     |                    |                               |
|            |          |     |                    |                               |
|            |          |     |                    |                               |
|            |          |     |                    |                               |

## Clinical screening guidelines for family members

| Family member's age | How often you should see a cardiologist |
|---------------------|-----------------------------------------|
| 0 - 5 years         | Optional                                |
| 6 - 10 years        | Every 3 - 5 years                       |
| 11 - 20 years       | Every 12 - 18 months                    |
| 21 - 30 years       | Every 2 - 3 years                       |
| 31 or more years    | Every 3 - 5 years                       |

This only applies to first-degree relatives (i.e. parents, brother/sister and children) of someone with HCM. If anyone in the family is having any symptoms suggesting a heart problem, they should see a cardiologist.

Figure 4

349x225mm (300 x 300 DPI)

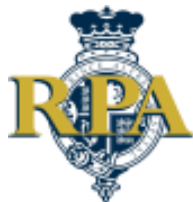

## **Communicating Hypertrophic Cardiomyopathy (HCM) Genetic Test Results**

### **INFORMATION FOR PARTICIPANTS**

#### **Introduction**

You are invited to take part in a research study examining how we can best communicate genetic test results in hypertrophic cardiomyopathy (HCM). Genetic testing for genetic heart diseases like HCM has become increasingly complex and our method of explaining these results needs to evolve to meet these changing needs. Cardiac genetic counsellors coordinate the genetic testing process and they play a key role in ensuring the information you are receiving is clear and meaningful for you and your family. The objective of this study is to compare the effectiveness of an intervention aimed at improving the way we communicate genetic test result information with our current usual care. If you consent to the study, you will be randomly assigned to either the new communication intervention or to usual care.

Individuals with hypertrophic cardiomyopathy are eligible to participate in this study if they are the first in their family to have genetic testing. People aged 16 years or older are eligible to participate; however children younger than this are excluded.

The study is being conducted by Dr Jodie Ingles, Prof Christopher Semsarian, Ms Laura Yeates and Ms Charlotte Burns from the Molecular Cardiology Research Program, Centenary Institute and Royal Prince Alfred Hospital Sydney.

#### **Study Procedures**

If you agree to participate in this study, you will be asked to complete the participant consent form. You will then be randomly allocated to one of two groups, to receive your genetic test result. Two weeks after your genetic test result appointment, you will be asked to complete a survey (*either paper or online*), asking about your understanding of genetic testing for HCM. This survey will take between 10-20 minutes to complete.

**In addition, the researchers would like to phone you at one, three and six month intervals to follow up with you after you receive your genetic result. These phone calls will take approximately 10 minutes and will be conducted at a time that suits you.**

1 Researchers will have access to your medical record to obtain information relevant  
2 to this study. Information about you may also be sought from the *Australian Genetic*  
3 *Heart Disease Registry*, if you have enrolled ([www.heartregistry.org.au](http://www.heartregistry.org.au)).  
4 Confidentiality of the survey responses will be paramount. Your name will be  
5 replaced with a unique code and only Dr Jodie Ingles will have access to the true  
6 identity of respondents.  
7

8  
9 No additional genetic testing will be carried out as part of this study.

10  
11 Information collected about you will be securely stored.  
12

### 13 **Benefits**

14  
15 While we intend that this research study furthers medical knowledge and may  
16 improve management of genetic heart diseases in the future, it may not be of direct  
17 benefit to you.  
18

### 19 **Voluntary Participation**

20  
21 Participation in this study is entirely voluntary. You do not have to take part in it. If  
22 you do take part, you can withdraw at any time without having to give a reason.  
23 Whatever your decision, please be assured that it will not affect your medical  
24 treatment or your relationship with the staff who are caring for you.  
25

### 26 **Confidentiality**

27  
28 All of the information collected from you for the study will be treated confidentially,  
29 and only the researchers named above will have access to it. The study results may  
30 be presented at a conference or in a scientific publication, but individual participants  
31 will not be identifiable in such a presentation.  
32

33  
34 Any forms completed online, including the participant consent form and survey will  
35 be extremely secure to maintain participant privacy.  
36

### 37 **Further Information**

38  
39 When you have read this information, one of the investigators is available to discuss  
40 it with you further and answer any questions you may have. If you would like to  
41 know more at any stage, please feel free to contact:  
42

#### 43 ***Dr Jodie Ingles***

44 Molecular Cardiology Research Program

45 Centenary Institute

46 Locked Bag No 6, Newtown NSW 2042

47 Ph. 02 9565 6293

48 Email. [j.ingles@centenary.org.au](mailto:j.ingles@centenary.org.au) Web. [www.heartregistry.org.au](http://www.heartregistry.org.au)  
49

50  
51 This information sheet is for you to keep.  
52

### 53 **Ethics Approval and Complaints**

1 This study has been approved by the Ethics Review Committee (RPAH Zone) of the  
2 Sydney Local Health District. Any person with concerns or complaints about the  
3 conduct of this study should contact the Executive Officer on 02 9515 6766 and quote  
4 protocol number X16-0030.  
5  
6  
7  
8  
9  
10  
11  
12  
13  
14  
15  
16  
17  
18  
19  
20  
21  
22  
23  
24  
25  
26  
27  
28  
29  
30  
31  
32  
33  
34  
35  
36  
37  
38  
39  
40  
41  
42  
43  
44  
45  
46  
47  
48  
49  
50  
51  
52  
53  
54  
55  
56  
57  
58  
59  
60

For peer review only



# Communicating Hypertrophic Cardiomyopathy (HCM) Genetic Test Results

## PARTICIPANT CONSENT FORM

FOR PEER REVIEW ONLY

I, ..... [name]  
of ..... [address]  
..... [email]

have read and understood the Information for Participants on the abovenamed research study  
and have discussed the study with .....

I have been made aware of the procedures involved in the study.

I understand that my participation in this study will allow the researchers to have access to my  
medical record, including information held by the Australian Genetic Heart Disease Registry (if  
I am enrolled), and I agree to this.

I freely choose to participate in this study and understand that I can withdraw at any time.

I also understand that the research study is strictly confidential.

I hereby agree to participate in this research study.

**NAME:** .....

**SIGNATURE:** .....

**DATE:** .....

**NAME OF WITNESS:** .....

**SIGNATURE OF WITNESS:** .....

Hello, this is (Insert Name) from the Centenary Institute, may I please speak to (Participant name)?

I am phoning (as we discussed back in (insert month of genetic result return) to follow up with you after you received your genetic result as part of our research into communicating genetic results. This is your (one month, three month, six month) follow up phone call. I was hoping to get some additional information from you regarding your gene result. Do you have 10 minutes or so to do this now- or I can arrange a more appropriate time?

---

**SECTION 1: 3-generation pedigree documented – Have this documented prior to phone call. Confirm during phone call.**

---

## **SECTION 2**

**Who in the family have you told about the following: (List names/details):  
Your diagnosis of HCM?**

**About your genetic result?**

**Who in the family has had an echo/ecg/Cardiology review- Outcome?  
(Assess against guidelines)?**

**Who in the family has had genetic testing- Outcome?**

**Who in the family is awaiting an appointment- with whom?**

---

## **SECTION 3:**

Total number of first degree relatives informed of diagnosis =

Total number of first degree relatives informed of genetic test outcome=

Total number of first degree relatives who have had cardiology review=

Total number of first degree relatives who have had genetic review=

Total number of first degree relatives awaiting review=

Total number of first degree relatives with a positive clinical screen=

Total number of relatives with a negative clinical screen =

Total number of first degree relatives with a positive genetic result =

Total number of first degree relatives with a negative genetic result=

Total number of other relatives informed =



# Reporting checklist for protocol of a clinical trial.

Based on the SPIRIT guidelines.

## Instructions to authors

Complete this checklist by entering the page numbers from your manuscript where readers will find each of the items listed below.

Your article may not currently address all the items on the checklist. Please modify your text to include the missing information. If you are certain that an item does not apply, please write "n/a" and provide a short explanation.

Upload your completed checklist as an extra file when you submit to a journal.

In your methods section, say that you used the SPIRIT reporting guidelines, and cite them as:

Chan A-W, Tetzlaff JM, Altman DG, Laupacis A, Gøtzsche PC, Krleža-Jerić K, Hróbjartsson A, Mann H, Dickersin K, Berlin J, Doré C, Parulekar W, Summerskill W, Groves T, Schulz K, Sox H, Rockhold FW, Rennie D, Moher D. SPIRIT 2013 Statement: Defining standard protocol items for clinical trials. *Ann Intern Med.* 2013;158(3):200-207

|                                             |                     | Reporting Item                                                                                               | Page Number                  |
|---------------------------------------------|---------------------|--------------------------------------------------------------------------------------------------------------|------------------------------|
| Title                                       | <a href="#">#1</a>  | Descriptive title identifying the study design, population, interventions, and, if applicable, trial acronym | <b>1</b>                     |
| Trial registration                          | <a href="#">#2a</a> | Trial identifier and registry name. If not yet registered, name of intended registry                         | <b>2, Table 1</b>            |
| Trial registration: data set                | <a href="#">#2b</a> | All items from the World Health Organization Trial Registration Data Set                                     | <b>9, Table 1</b>            |
| Protocol version                            | <a href="#">#3</a>  | Date and version identifier                                                                                  | <b>1</b>                     |
| Funding                                     | <a href="#">#4</a>  | Sources and types of financial, material, and other support                                                  | <b>18</b>                    |
| Roles and responsibilities: contributorship | <a href="#">#5a</a> | Names, affiliations, and roles of protocol contributors                                                      | <b>1, 18</b>                 |
| Roles and                                   | <a href="#">#5b</a> | Name and contact information for the trial                                                                   | <b>NA- No trial sponsor.</b> |

|    |                   |                     |                                              |                               |
|----|-------------------|---------------------|----------------------------------------------|-------------------------------|
| 1  | responsibilities: |                     | sponsor                                      |                               |
| 2  | sponsor contact   |                     |                                              |                               |
| 3  | information       |                     |                                              |                               |
| 4  |                   |                     |                                              |                               |
| 5  | Roles and         | <a href="#">#5c</a> | Role of study sponsor and funders, if any,   | <b>NA- no role other than</b> |
| 6  | responsibilities: |                     | in study design; collection, management,     | <b>funding for key</b>        |
| 7  | sponsor and       |                     | analysis, and interpretation of data;        | <b>researchers.</b>           |
| 8  | funder            |                     | writing of the report; and the decision to   |                               |
| 9  |                   |                     | submit the report for publication, including |                               |
| 10 |                   |                     | whether they will have ultimate authority    |                               |
| 11 |                   |                     | over any of these activities                 |                               |
| 12 |                   |                     |                                              |                               |
| 13 |                   |                     |                                              |                               |
| 14 |                   |                     |                                              |                               |
| 15 |                   |                     |                                              |                               |
| 16 | Roles and         | <a href="#">#5d</a> | Composition, roles, and responsibilities of  | <b>NA</b>                     |
| 17 | responsibilities: |                     | the coordinating centre, steering            |                               |
| 18 | committees        |                     | committee, endpoint adjudication             |                               |
| 19 |                   |                     | committee, data management team, and         |                               |
| 20 |                   |                     | other individuals or groups overseeing       |                               |
| 21 |                   |                     | the trial, if applicable (see Item 21a for   |                               |
| 22 |                   |                     | data monitoring committee)                   |                               |
| 23 |                   |                     |                                              |                               |
| 24 |                   |                     |                                              |                               |
| 25 |                   |                     |                                              |                               |
| 26 |                   |                     |                                              |                               |
| 27 |                   |                     |                                              |                               |
| 28 | Background and    | <a href="#">#6a</a> | Description of research question and         | <b>4</b>                      |
| 29 | rationale         |                     | justification for undertaking the trial,     |                               |
| 30 |                   |                     | including summary of relevant studies        |                               |
| 31 |                   |                     | (published and unpublished) examining        |                               |
| 32 |                   |                     | benefits and harms for each intervention     |                               |
| 33 |                   |                     |                                              |                               |
| 34 |                   |                     |                                              |                               |
| 35 |                   |                     |                                              |                               |
| 36 | Background and    | <a href="#">#6b</a> | Explanation for choice of comparators        | <b>11</b>                     |
| 37 | rationale: choice |                     |                                              |                               |
| 38 | of comparators    |                     |                                              |                               |
| 39 |                   |                     |                                              |                               |
| 40 |                   |                     |                                              |                               |
| 41 | Objectives        | <a href="#">#7</a>  | Specific objectives or hypotheses            | <b>7,8</b>                    |
| 42 |                   |                     |                                              |                               |
| 43 |                   |                     |                                              |                               |
| 44 | Trial design      | <a href="#">#8</a>  | Description of trial design including type   | <b>9</b>                      |
| 45 |                   |                     | of trial (eg, parallel group, crossover,     |                               |
| 46 |                   |                     | factorial, single group), allocation ratio,  |                               |
| 47 |                   |                     | and framework (eg, superiority,              |                               |
| 48 |                   |                     | equivalence, non-inferiority, exploratory)   |                               |
| 49 |                   |                     |                                              |                               |
| 50 |                   |                     |                                              |                               |
| 51 |                   |                     |                                              |                               |
| 52 | Study setting     | <a href="#">#9</a>  | Description of study settings (eg,           | <b>9</b>                      |
| 53 |                   |                     | community clinic, academic hospital) and     |                               |
| 54 |                   |                     | list of countries where data will be         |                               |
| 55 |                   |                     | collected. Reference to where list of study  |                               |
| 56 |                   |                     | sites can be obtained                        |                               |
| 57 |                   |                     |                                              |                               |
| 58 |                   |                     |                                              |                               |
| 59 |                   |                     |                                              |                               |
| 60 |                   |                     |                                              |                               |

|    |                      |                      |                                                                                                                                                                                                                                                                                                                                                                                |                                                    |
|----|----------------------|----------------------|--------------------------------------------------------------------------------------------------------------------------------------------------------------------------------------------------------------------------------------------------------------------------------------------------------------------------------------------------------------------------------|----------------------------------------------------|
| 1  | Eligibility criteria | <a href="#">#10</a>  | Inclusion and exclusion criteria for participants. If applicable, eligibility criteria for study centres and individuals who will perform the interventions (eg, surgeons, psychotherapists)                                                                                                                                                                                   | <b>9</b>                                           |
| 2  |                      |                      |                                                                                                                                                                                                                                                                                                                                                                                |                                                    |
| 3  |                      |                      |                                                                                                                                                                                                                                                                                                                                                                                |                                                    |
| 4  |                      |                      |                                                                                                                                                                                                                                                                                                                                                                                |                                                    |
| 5  |                      |                      |                                                                                                                                                                                                                                                                                                                                                                                |                                                    |
| 6  |                      |                      |                                                                                                                                                                                                                                                                                                                                                                                |                                                    |
| 7  |                      |                      |                                                                                                                                                                                                                                                                                                                                                                                |                                                    |
| 8  |                      |                      |                                                                                                                                                                                                                                                                                                                                                                                |                                                    |
| 9  | Interventions:       | <a href="#">#11a</a> | Interventions for each group with sufficient detail to allow replication, including how and when they will be administered                                                                                                                                                                                                                                                     | <b>11</b>                                          |
| 10 | description          |                      |                                                                                                                                                                                                                                                                                                                                                                                |                                                    |
| 11 |                      |                      |                                                                                                                                                                                                                                                                                                                                                                                |                                                    |
| 12 |                      |                      |                                                                                                                                                                                                                                                                                                                                                                                |                                                    |
| 13 |                      |                      |                                                                                                                                                                                                                                                                                                                                                                                |                                                    |
| 14 |                      |                      |                                                                                                                                                                                                                                                                                                                                                                                |                                                    |
| 15 |                      |                      |                                                                                                                                                                                                                                                                                                                                                                                |                                                    |
| 16 | Interventions:       | <a href="#">#11b</a> | Criteria for discontinuing or modifying allocated interventions for a given trial participant (eg, drug dose change in response to harms, participant request, or improving / worsening disease)                                                                                                                                                                               | <b>NA</b>                                          |
| 17 | modifications        |                      |                                                                                                                                                                                                                                                                                                                                                                                |                                                    |
| 18 |                      |                      |                                                                                                                                                                                                                                                                                                                                                                                |                                                    |
| 19 |                      |                      |                                                                                                                                                                                                                                                                                                                                                                                |                                                    |
| 20 |                      |                      |                                                                                                                                                                                                                                                                                                                                                                                |                                                    |
| 21 |                      |                      |                                                                                                                                                                                                                                                                                                                                                                                |                                                    |
| 22 |                      |                      |                                                                                                                                                                                                                                                                                                                                                                                |                                                    |
| 23 |                      |                      |                                                                                                                                                                                                                                                                                                                                                                                |                                                    |
| 24 | Interventions:       | <a href="#">#11c</a> | Strategies to improve adherence to intervention protocols, and any procedures for monitoring adherence (eg, drug tablet return; laboratory tests)                                                                                                                                                                                                                              | <b>NA- intervention was one clinic appointment</b> |
| 25 | adherence            |                      |                                                                                                                                                                                                                                                                                                                                                                                |                                                    |
| 26 |                      |                      |                                                                                                                                                                                                                                                                                                                                                                                |                                                    |
| 27 |                      |                      |                                                                                                                                                                                                                                                                                                                                                                                |                                                    |
| 28 |                      |                      |                                                                                                                                                                                                                                                                                                                                                                                |                                                    |
| 29 |                      |                      |                                                                                                                                                                                                                                                                                                                                                                                |                                                    |
| 30 |                      |                      |                                                                                                                                                                                                                                                                                                                                                                                |                                                    |
| 31 | Interventions:       | <a href="#">#11d</a> | Relevant concomitant care and interventions that are permitted or prohibited during the trial                                                                                                                                                                                                                                                                                  | <b>NA</b>                                          |
| 32 | concomitant care     |                      |                                                                                                                                                                                                                                                                                                                                                                                |                                                    |
| 33 |                      |                      |                                                                                                                                                                                                                                                                                                                                                                                |                                                    |
| 34 |                      |                      |                                                                                                                                                                                                                                                                                                                                                                                |                                                    |
| 35 |                      |                      |                                                                                                                                                                                                                                                                                                                                                                                |                                                    |
| 36 | Outcomes             | <a href="#">#12</a>  | Primary, secondary, and other outcomes, including the specific measurement variable (eg, systolic blood pressure), analysis metric (eg, change from baseline, final value, time to event), method of aggregation (eg, median, proportion), and time point for each outcome. Explanation of the clinical relevance of chosen efficacy and harm outcomes is strongly recommended | <b>12,13,14</b>                                    |
| 37 |                      |                      |                                                                                                                                                                                                                                                                                                                                                                                |                                                    |
| 38 |                      |                      |                                                                                                                                                                                                                                                                                                                                                                                |                                                    |
| 39 |                      |                      |                                                                                                                                                                                                                                                                                                                                                                                |                                                    |
| 40 |                      |                      |                                                                                                                                                                                                                                                                                                                                                                                |                                                    |
| 41 |                      |                      |                                                                                                                                                                                                                                                                                                                                                                                |                                                    |
| 42 |                      |                      |                                                                                                                                                                                                                                                                                                                                                                                |                                                    |
| 43 |                      |                      |                                                                                                                                                                                                                                                                                                                                                                                |                                                    |
| 44 |                      |                      |                                                                                                                                                                                                                                                                                                                                                                                |                                                    |
| 45 |                      |                      |                                                                                                                                                                                                                                                                                                                                                                                |                                                    |
| 46 |                      |                      |                                                                                                                                                                                                                                                                                                                                                                                |                                                    |
| 47 |                      |                      |                                                                                                                                                                                                                                                                                                                                                                                |                                                    |
| 48 |                      |                      |                                                                                                                                                                                                                                                                                                                                                                                |                                                    |
| 49 |                      |                      |                                                                                                                                                                                                                                                                                                                                                                                |                                                    |
| 50 |                      |                      |                                                                                                                                                                                                                                                                                                                                                                                |                                                    |
| 51 |                      |                      |                                                                                                                                                                                                                                                                                                                                                                                |                                                    |
| 52 | Participant          | <a href="#">#13</a>  | Time schedule of enrolment, interventions (including any run-ins and washouts), assessments, and visits for participants. A schematic diagram is highly recommended (see Figure)                                                                                                                                                                                               | <b>8, Figure 1</b>                                 |
| 53 | timeline             |                      |                                                                                                                                                                                                                                                                                                                                                                                |                                                    |
| 54 |                      |                      |                                                                                                                                                                                                                                                                                                                                                                                |                                                    |
| 55 |                      |                      |                                                                                                                                                                                                                                                                                                                                                                                |                                                    |
| 56 |                      |                      |                                                                                                                                                                                                                                                                                                                                                                                |                                                    |
| 57 |                      |                      |                                                                                                                                                                                                                                                                                                                                                                                |                                                    |
| 58 |                      |                      |                                                                                                                                                                                                                                                                                                                                                                                |                                                    |
| 59 |                      |                      |                                                                                                                                                                                                                                                                                                                                                                                |                                                    |

|    |                                                   |                      |                                                                                                                                                                                                                                                                                                                                                          |                                                                                                                                       |
|----|---------------------------------------------------|----------------------|----------------------------------------------------------------------------------------------------------------------------------------------------------------------------------------------------------------------------------------------------------------------------------------------------------------------------------------------------------|---------------------------------------------------------------------------------------------------------------------------------------|
| 1  | Sample size                                       | <a href="#">#14</a>  | Estimated number of participants needed to achieve study objectives and how it was determined, including clinical and statistical assumptions supporting any sample size calculations                                                                                                                                                                    | <b>10</b>                                                                                                                             |
| 2  |                                                   |                      |                                                                                                                                                                                                                                                                                                                                                          |                                                                                                                                       |
| 3  |                                                   |                      |                                                                                                                                                                                                                                                                                                                                                          |                                                                                                                                       |
| 4  |                                                   |                      |                                                                                                                                                                                                                                                                                                                                                          |                                                                                                                                       |
| 5  |                                                   |                      |                                                                                                                                                                                                                                                                                                                                                          |                                                                                                                                       |
| 6  |                                                   |                      |                                                                                                                                                                                                                                                                                                                                                          |                                                                                                                                       |
| 7  |                                                   |                      |                                                                                                                                                                                                                                                                                                                                                          |                                                                                                                                       |
| 8  |                                                   |                      |                                                                                                                                                                                                                                                                                                                                                          |                                                                                                                                       |
| 9  | Recruitment                                       | <a href="#">#15</a>  | Strategies for achieving adequate participant enrolment to reach target sample size                                                                                                                                                                                                                                                                      | <b>9</b>                                                                                                                              |
| 10 |                                                   |                      |                                                                                                                                                                                                                                                                                                                                                          |                                                                                                                                       |
| 11 |                                                   |                      |                                                                                                                                                                                                                                                                                                                                                          |                                                                                                                                       |
| 12 |                                                   |                      |                                                                                                                                                                                                                                                                                                                                                          |                                                                                                                                       |
| 13 |                                                   |                      |                                                                                                                                                                                                                                                                                                                                                          |                                                                                                                                       |
| 14 | Allocation:<br>sequence<br>generation             | <a href="#">#16a</a> | Method of generating the allocation sequence (eg, computer-generated random numbers), and list of any factors for stratification. To reduce predictability of a random sequence, details of any planned restriction (eg, blocking) should be provided in a separate document that is unavailable to those who enrol participants or assign interventions | <b>9,10</b>                                                                                                                           |
| 15 |                                                   |                      |                                                                                                                                                                                                                                                                                                                                                          |                                                                                                                                       |
| 16 |                                                   |                      |                                                                                                                                                                                                                                                                                                                                                          |                                                                                                                                       |
| 17 |                                                   |                      |                                                                                                                                                                                                                                                                                                                                                          |                                                                                                                                       |
| 18 |                                                   |                      |                                                                                                                                                                                                                                                                                                                                                          |                                                                                                                                       |
| 19 |                                                   |                      |                                                                                                                                                                                                                                                                                                                                                          |                                                                                                                                       |
| 20 |                                                   |                      |                                                                                                                                                                                                                                                                                                                                                          |                                                                                                                                       |
| 21 |                                                   |                      |                                                                                                                                                                                                                                                                                                                                                          |                                                                                                                                       |
| 22 |                                                   |                      |                                                                                                                                                                                                                                                                                                                                                          |                                                                                                                                       |
| 23 |                                                   |                      |                                                                                                                                                                                                                                                                                                                                                          |                                                                                                                                       |
| 24 |                                                   |                      |                                                                                                                                                                                                                                                                                                                                                          |                                                                                                                                       |
| 25 |                                                   |                      |                                                                                                                                                                                                                                                                                                                                                          |                                                                                                                                       |
| 26 |                                                   |                      |                                                                                                                                                                                                                                                                                                                                                          |                                                                                                                                       |
| 27 |                                                   |                      |                                                                                                                                                                                                                                                                                                                                                          |                                                                                                                                       |
| 28 |                                                   |                      |                                                                                                                                                                                                                                                                                                                                                          |                                                                                                                                       |
| 29 | Allocation<br>concealment<br>mechanism            | <a href="#">#16b</a> | Mechanism of implementing the allocation sequence (eg, central telephone; sequentially numbered, opaque, sealed envelopes), describing any steps to conceal the sequence until interventions are assigned                                                                                                                                                | <b>9,10</b>                                                                                                                           |
| 30 |                                                   |                      |                                                                                                                                                                                                                                                                                                                                                          |                                                                                                                                       |
| 31 |                                                   |                      |                                                                                                                                                                                                                                                                                                                                                          |                                                                                                                                       |
| 32 |                                                   |                      |                                                                                                                                                                                                                                                                                                                                                          |                                                                                                                                       |
| 33 |                                                   |                      |                                                                                                                                                                                                                                                                                                                                                          |                                                                                                                                       |
| 34 |                                                   |                      |                                                                                                                                                                                                                                                                                                                                                          |                                                                                                                                       |
| 35 |                                                   |                      |                                                                                                                                                                                                                                                                                                                                                          |                                                                                                                                       |
| 36 |                                                   |                      |                                                                                                                                                                                                                                                                                                                                                          |                                                                                                                                       |
| 37 |                                                   |                      |                                                                                                                                                                                                                                                                                                                                                          |                                                                                                                                       |
| 38 |                                                   |                      |                                                                                                                                                                                                                                                                                                                                                          |                                                                                                                                       |
| 39 | Allocation:<br>implementation                     | <a href="#">#16c</a> | Who will generate the allocation sequence, who will enrol participants, and who will assign participants to interventions                                                                                                                                                                                                                                | <b>9,10</b>                                                                                                                           |
| 40 |                                                   |                      |                                                                                                                                                                                                                                                                                                                                                          |                                                                                                                                       |
| 41 |                                                   |                      |                                                                                                                                                                                                                                                                                                                                                          |                                                                                                                                       |
| 42 |                                                   |                      |                                                                                                                                                                                                                                                                                                                                                          |                                                                                                                                       |
| 43 |                                                   |                      |                                                                                                                                                                                                                                                                                                                                                          |                                                                                                                                       |
| 44 |                                                   |                      |                                                                                                                                                                                                                                                                                                                                                          |                                                                                                                                       |
| 45 | Blinding (masking)                                | <a href="#">#17a</a> | Who will be blinded after assignment to interventions (eg, trial participants, care providers, outcome assessors, data analysts), and how                                                                                                                                                                                                                | <b>15</b>                                                                                                                             |
| 46 |                                                   |                      |                                                                                                                                                                                                                                                                                                                                                          |                                                                                                                                       |
| 47 |                                                   |                      |                                                                                                                                                                                                                                                                                                                                                          |                                                                                                                                       |
| 48 |                                                   |                      |                                                                                                                                                                                                                                                                                                                                                          |                                                                                                                                       |
| 49 |                                                   |                      |                                                                                                                                                                                                                                                                                                                                                          |                                                                                                                                       |
| 50 |                                                   |                      |                                                                                                                                                                                                                                                                                                                                                          |                                                                                                                                       |
| 51 |                                                   |                      |                                                                                                                                                                                                                                                                                                                                                          |                                                                                                                                       |
| 52 | Blinding<br>(masking):<br>emergency<br>unblinding | <a href="#">#17b</a> | If blinded, circumstances under which unblinding is permissible, and procedure for revealing a participant's allocated intervention during the trial                                                                                                                                                                                                     | <b>NA- researcher will be blinded to treatment arm for analysis only, however researchers will not be blinded during intervention</b> |
| 53 |                                                   |                      |                                                                                                                                                                                                                                                                                                                                                          |                                                                                                                                       |
| 54 |                                                   |                      |                                                                                                                                                                                                                                                                                                                                                          |                                                                                                                                       |
| 55 |                                                   |                      |                                                                                                                                                                                                                                                                                                                                                          |                                                                                                                                       |
| 56 |                                                   |                      |                                                                                                                                                                                                                                                                                                                                                          |                                                                                                                                       |
| 57 |                                                   |                      |                                                                                                                                                                                                                                                                                                                                                          |                                                                                                                                       |
| 58 |                                                   |                      |                                                                                                                                                                                                                                                                                                                                                          |                                                                                                                                       |
| 59 |                                                   |                      |                                                                                                                                                                                                                                                                                                                                                          |                                                                                                                                       |
| 60 |                                                   |                      |                                                                                                                                                                                                                                                                                                                                                          |                                                                                                                                       |

**because of nature of intervention.**

|    |                      |                      |                                               |
|----|----------------------|----------------------|-----------------------------------------------|
| 1  |                      |                      |                                               |
| 2  |                      |                      |                                               |
| 3  |                      |                      |                                               |
| 4  | Data collection      | <a href="#">#18a</a> | Plans for assessment and collection of        |
| 5  | plan                 |                      | outcome, baseline, and other trial data,      |
| 6  |                      |                      | including any related processes to            |
| 7  |                      |                      | promote data quality (eg, duplicate           |
| 8  |                      |                      | measurements, training of assessors)          |
| 9  |                      |                      | and a description of study instruments        |
| 10 |                      |                      | (eg, questionnaires, laboratory tests)        |
| 11 |                      |                      | along with their reliability and validity, if |
| 12 |                      |                      | known. Reference to where data                |
| 13 |                      |                      | collection forms can be found, if not in the  |
| 14 |                      |                      | protocol                                      |
| 15 |                      |                      |                                               |
| 16 |                      |                      |                                               |
| 17 |                      |                      |                                               |
| 18 |                      |                      |                                               |
| 19 |                      |                      |                                               |
| 20 |                      |                      |                                               |
| 21 | Data collection      | <a href="#">#18b</a> | Plans to promote participant retention        |
| 22 | plan: retention      |                      | and complete follow-up, including list of     |
| 23 |                      |                      | any outcome data to be collected for          |
| 24 |                      |                      | participants who discontinue or deviate       |
| 25 |                      |                      | from intervention protocols                   |
| 26 |                      |                      |                                               |
| 27 |                      |                      |                                               |
| 28 |                      |                      |                                               |
| 29 | Data management      | <a href="#">#19</a>  | Plans for data entry, coding, security, and   |
| 30 |                      |                      | storage, including any related processes      |
| 31 |                      |                      | to promote data quality (eg, double data      |
| 32 |                      |                      | entry; range checks for data values).         |
| 33 |                      |                      | Reference to where details of data            |
| 34 |                      |                      | management procedures can be found, if        |
| 35 |                      |                      | not in the protocol                           |
| 36 |                      |                      |                                               |
| 37 |                      |                      |                                               |
| 38 |                      |                      |                                               |
| 39 |                      |                      |                                               |
| 40 |                      |                      |                                               |
| 41 | Statistics:          | <a href="#">#20a</a> | Statistical methods for analysing primary     |
| 42 | outcomes             |                      | and secondary outcomes. Reference             |
| 43 |                      |                      | to where other details of the statistical     |
| 44 |                      |                      | analysis plan can be found, if not in the     |
| 45 |                      |                      | protocol                                      |
| 46 |                      |                      |                                               |
| 47 |                      |                      |                                               |
| 48 |                      |                      |                                               |
| 49 | Statistics:          | <a href="#">#20b</a> | Methods for any additional analyses (eg,      |
| 50 | additional           |                      | subgroup and adjusted analyses)               |
| 51 | analyses             |                      |                                               |
| 52 |                      |                      |                                               |
| 53 |                      |                      |                                               |
| 54 | Statistics: analysis | <a href="#">#20c</a> | Definition of analysis population relating    |
| 55 | population and       |                      | to protocol non-adherence (eg, as             |
| 56 | missing data         |                      | randomised analysis), and any statistical     |
| 57 |                      |                      |                                               |
| 58 |                      |                      |                                               |
| 59 |                      |                      |                                               |
| 60 |                      |                      |                                               |

**12,13,14, Table 2, Figure 2, Figure 3, Figure 4**

**15**

**15**

**16**

**16**

**NA- not relevant to study design.**

methods to handle missing data (eg, multiple imputation)

|    |                   |                      |                                              |
|----|-------------------|----------------------|----------------------------------------------|
| 1  |                   |                      |                                              |
| 2  |                   |                      |                                              |
| 3  |                   |                      |                                              |
| 4  | Data monitoring:  | <a href="#">#21a</a> | Composition of data monitoring               |
| 5  | formal committee  |                      | committee (DMC); summary of its role         |
| 6  |                   |                      | and reporting structure; statement of        |
| 7  |                   |                      | whether it is independent from the           |
| 8  |                   |                      | sponsor and competing interests; and         |
| 9  |                   |                      | reference to where further details about     |
| 10 |                   |                      | its charter can be found, if not in the      |
| 11 |                   |                      | protocol. Alternatively, an explanation of   |
| 12 |                   |                      | why a DMC is not needed                      |
| 13 |                   |                      |                                              |
| 14 |                   |                      |                                              |
| 15 |                   |                      |                                              |
| 16 |                   |                      |                                              |
| 17 |                   |                      |                                              |
| 18 | Data monitoring:  | <a href="#">#21b</a> | Description of any interim analyses and      |
| 19 | interim analysis  |                      | stopping guidelines, including who will      |
| 20 |                   |                      | have access to these interim results and     |
| 21 |                   |                      | make the final decision to terminate the     |
| 22 |                   |                      | trial                                        |
| 23 |                   |                      |                                              |
| 24 |                   |                      |                                              |
| 25 |                   |                      |                                              |
| 26 | Harms             | <a href="#">#22</a>  | Plans for collecting, assessing, reporting,  |
| 27 |                   |                      | and managing solicited and                   |
| 28 |                   |                      | spontaneously reported adverse events        |
| 29 |                   |                      | and other unintended effects of trial        |
| 30 |                   |                      | interventions or trial conduct               |
| 31 |                   |                      |                                              |
| 32 |                   |                      |                                              |
| 33 |                   |                      |                                              |
| 34 |                   |                      |                                              |
| 35 | Auditing          | <a href="#">#23</a>  | Frequency and procedures for auditing        |
| 36 |                   |                      | trial conduct, if any, and whether the       |
| 37 |                   |                      | process will be independent from             |
| 38 |                   |                      | investigators and the sponsor                |
| 39 |                   |                      |                                              |
| 40 |                   |                      |                                              |
| 41 |                   |                      |                                              |
| 42 | Research ethics   | <a href="#">#24</a>  | Plans for seeking research ethics            |
| 43 | approval          |                      | committee / institutional review board       |
| 44 |                   |                      | (REC / IRB) approval                         |
| 45 |                   |                      |                                              |
| 46 |                   |                      |                                              |
| 47 | Protocol          | <a href="#">#25</a>  | Plans for communicating important            |
| 48 | amendments        |                      | protocol modifications (eg, changes to       |
| 49 |                   |                      | eligibility criteria, outcomes, analyses) to |
| 50 |                   |                      | relevant parties (eg, investigators, REC /   |
| 51 |                   |                      | IRBs, trial participants, trial registries,  |
| 52 |                   |                      | journals, regulators)                        |
| 53 |                   |                      |                                              |
| 54 |                   |                      |                                              |
| 55 |                   |                      |                                              |
| 56 |                   |                      |                                              |
| 57 | Consent or assent | <a href="#">#26a</a> | Who will obtain informed consent or          |
| 58 |                   |                      | assent from potential trial participants or  |
| 59 |                   |                      |                                              |
| 60 |                   |                      |                                              |

|    |                       |                      |                                                                                                                                            |                               |
|----|-----------------------|----------------------|--------------------------------------------------------------------------------------------------------------------------------------------|-------------------------------|
| 1  |                       |                      | authorised surrogates, and how (see Item                                                                                                   |                               |
| 2  |                       |                      | 32)                                                                                                                                        |                               |
| 3  |                       |                      |                                                                                                                                            |                               |
| 4  | Consent or            | <a href="#">#26b</a> | Additional consent provisions for                                                                                                          | <b>NA</b>                     |
| 5  | assent: ancillary     |                      | collection and use of participant data and                                                                                                 |                               |
| 6  | studies               |                      | biological specimens in ancillary studies,                                                                                                 |                               |
| 7  |                       |                      | if applicable                                                                                                                              |                               |
| 8  |                       |                      |                                                                                                                                            |                               |
| 9  |                       |                      |                                                                                                                                            |                               |
| 10 | Confidentiality       | <a href="#">#27</a>  | How personal information about potential                                                                                                   | <b>16</b>                     |
| 11 |                       |                      | and enrolled participants will be collected,                                                                                               |                               |
| 12 |                       |                      | shared, and maintained in order to                                                                                                         |                               |
| 13 |                       |                      | protect confidentiality before, during, and                                                                                                |                               |
| 14 |                       |                      | after the trial                                                                                                                            |                               |
| 15 |                       |                      |                                                                                                                                            |                               |
| 16 |                       |                      |                                                                                                                                            |                               |
| 17 |                       |                      |                                                                                                                                            |                               |
| 18 |                       |                      |                                                                                                                                            |                               |
| 19 | Declaration of        | <a href="#">#28</a>  | Financial and other competing interests                                                                                                    | <b>1</b>                      |
| 20 | interests             |                      | for principal investigators for the overall                                                                                                |                               |
| 21 |                       |                      | trial and each study site                                                                                                                  |                               |
| 22 |                       |                      |                                                                                                                                            |                               |
| 23 |                       |                      |                                                                                                                                            |                               |
| 24 | Data access           | <a href="#">#29</a>  | Statement of who will have access to the                                                                                                   | <b>16/17</b>                  |
| 25 |                       |                      | final trial dataset, and disclosure of                                                                                                     |                               |
| 26 |                       |                      | contractual agreements that limit such                                                                                                     |                               |
| 27 |                       |                      | access for investigators                                                                                                                   |                               |
| 28 |                       |                      |                                                                                                                                            |                               |
| 29 |                       |                      |                                                                                                                                            |                               |
| 30 |                       |                      |                                                                                                                                            |                               |
| 31 | Ancillary and post    | <a href="#">#30</a>  | Provisions, if any, for ancillary and post-                                                                                                | <b>NA</b>                     |
| 32 | trial care            |                      | trial care, and for compensation to those                                                                                                  |                               |
| 33 |                       |                      | who suffer harm from trial participation                                                                                                   |                               |
| 34 |                       |                      |                                                                                                                                            |                               |
| 35 |                       |                      |                                                                                                                                            |                               |
| 36 | Dissemination         | <a href="#">#31a</a> | Plans for investigators and sponsor to                                                                                                     | <b>16/17</b>                  |
| 37 | policy: trial results |                      | communicate trial results to participants,                                                                                                 |                               |
| 38 |                       |                      | healthcare professionals, the public, and                                                                                                  |                               |
| 39 |                       |                      | other relevant groups (eg, via publication,                                                                                                |                               |
| 40 |                       |                      | reporting in results databases, or other                                                                                                   |                               |
| 41 |                       |                      | data sharing arrangements), including                                                                                                      |                               |
| 42 |                       |                      | any publication restrictions                                                                                                               |                               |
| 43 |                       |                      |                                                                                                                                            |                               |
| 44 |                       |                      |                                                                                                                                            |                               |
| 45 |                       |                      |                                                                                                                                            |                               |
| 46 |                       |                      |                                                                                                                                            |                               |
| 47 | Dissemination         | <a href="#">#31b</a> | Authorship eligibility guidelines and any                                                                                                  | <b>18</b>                     |
| 48 | policy: authorship    |                      | intended use of professional writers                                                                                                       |                               |
| 49 |                       |                      |                                                                                                                                            |                               |
| 50 |                       |                      |                                                                                                                                            |                               |
| 51 | Dissemination         | <a href="#">#31c</a> | Plans, if any, for granting public access to                                                                                               | <b>17</b>                     |
| 52 | policy:               |                      | the full protocol, participant-level dataset,                                                                                              |                               |
| 53 | reproducible          |                      | and statistical code                                                                                                                       |                               |
| 54 | research              |                      |                                                                                                                                            |                               |
| 55 |                       |                      |                                                                                                                                            |                               |
| 56 |                       |                      |                                                                                                                                            |                               |
| 57 |                       |                      |                                                                                                                                            |                               |
| 58 | Informed consent      | <a href="#">#32</a>  | Model consent form and other related                                                                                                       | <b>Supplementary material</b> |
| 59 |                       |                      |                                                                                                                                            |                               |
| 60 |                       |                      | For peer review only - <a href="http://bmjopen.bmj.com/site/about/guidelines.xhtml">http://bmjopen.bmj.com/site/about/guidelines.xhtml</a> |                               |

|              |                     |                                               |           |
|--------------|---------------------|-----------------------------------------------|-----------|
| 1 materials  |                     | documentation given to participants and       |           |
| 2            |                     | authorised surrogates                         |           |
| 3            |                     |                                               |           |
| 4 Biological | <a href="#">#33</a> | Plans for collection, laboratory evaluation,  | <b>NA</b> |
| 5 specimens  |                     | and storage of biological specimens for       |           |
| 6            |                     | genetic or molecular analysis in the          |           |
| 7            |                     | current trial and for future use in ancillary |           |
| 8            |                     | studies, if applicable                        |           |
| 9            |                     |                                               |           |
| 10           |                     |                                               |           |
| 11           |                     |                                               |           |

12 The SPIRIT checklist is distributed under the terms of the Creative Commons Attribution License CC-  
13 BY-ND 3.0. This checklist can be completed online using <https://www.goodreports.org/>, a tool made  
14 by the [EQUATOR Network](#) in collaboration with [Penelope.ai](#)  
15  
16  
17  
18  
19  
20  
21  
22  
23  
24  
25  
26  
27  
28  
29  
30  
31  
32  
33  
34  
35  
36  
37  
38  
39  
40  
41  
42  
43  
44  
45  
46  
47  
48  
49  
50  
51  
52  
53  
54  
55  
56  
57  
58  
59  
60
